# Supplementary material for: Detecting Depression Through Gait Data: Examining the Contribution of Gait Features in Recognizing Depression
Source: Front Psychiatry. 2021 May 7;12:661213. doi: 10.3389/fpsyt.2021.661213 (PMC8138135; doi:10.3389/fpsyt.2021.661213)
Supplement: Supplementary file 2 [file Table_2.XLSX]

## Sheet: feaPCC
Joints	Name	X/Y/Z-axis	Features	PC2		PC4		PC5		PC6		PC7		PC10		PC11		PC12		PC22		PC24		PC27		PC30		PC40		PC50		PC60		PC70		PC87
				r	P-Value	r	P-Value	r	P-Value	r	P-Value	r	P-Value	r	P-Value	r	P-Value	r	P-Value	r	P-Value	r	P-Value	r	P-Value	r	P-Value	r	P-Value	r	P-Value	r	P-Value	r	P-Value	r	P-Value
joint9	SpineBase	X	Direct current component	0.042759	0.503555	0.125963	0.0479844	0.209889	0.000903453	0.0187014	0.769942	-0.0259816	0.6845	0.158091	0.0128587	0.140241	0.0275397	-0.0310384	0.627357	-0.145108	0.0225448	0.17003	0.00740166	-0.00372994	0.953491	0.0856288	0.179791	-0.0758287	0.235067	0.0266979	0.676287	-0.0576407	0.36703	-0.0258659	0.68583	-0.00442925	0.944784
joint9	SpineBase	X	The mean of phases	0.0223331	0.726897	-0.155985	0.0141237	0.156755	0.0136491	-0.041456	0.516658	0.171749	0.00681614	0.122693	0.0541332	0.0627688	0.325876	0.0727022	0.254988	-0.0338805	0.596163	0.0582275	0.362164	-0.0241396	0.705792	0.00884795	0.889961	-0.175231	0.00575556	0.02098	0.742843	0.113075	0.0760978	-0.104648	0.100831	-0.0318762	0.61809
joint9	SpineBase	X	The variance of phases	-0.0979701	0.124635	-0.0670728	0.293733	0.150859	0.0176682	-0.0686684	0.282373	0.102249	0.108932	0.0691918	0.278712	0.0623287	0.329286	0.0519796	0.416029	-0.0346308	0.588048	0.0584428	0.360389	-0.00248805	0.968967	0.0104153	0.870625	-0.142332	0.0252874	-0.0194482	0.761028	0.0881137	0.167439	-0.119137	0.0615466	-0.035522	0.578473
joint9	SpineBase	X	The standard deviation of phases	-0.0929868	0.145075	-0.0859363	0.178227	0.135095	0.033825	-0.0624961	0.327987	0.118252	0.0635151	0.0861566	0.177112	0.0537465	0.400339	0.0714888	0.263026	-0.0345442	0.588982	0.0545618	0.39322	-0.0152733	0.811234	-0.00156682	0.980454	-0.148251	0.0197521	-0.0303087	0.635477	0.0966896	0.129661	-0.131829	0.0384163	-0.0332675	0.602832
joint9	SpineBase	X	The skewness of phases	-0.172971	0.00642552	0.0862103	0.176842	0.0967812	0.129296	-0.0614295	0.336325	0.0371894	0.560759	-0.0227925	0.72151	0.0749061	0.240829	0.0298108	0.641043	-0.0227305	0.722236	0.0486808	0.446269	0.00511179	0.936292	0.011328	0.859401	-0.0779217	0.222359	-0.0445876	0.485464	0.0396237	0.535376	-0.0858999	0.178411	-0.0272254	0.670262
joint9	SpineBase	X	The kurtosis of phases	-0.136679	0.0317714	0.113812	0.0741917	0.106948	0.0935208	-0.0425329	0.505815	0.0493356	0.44017	-0.0418375	0.512803	0.0956378	0.133905	0.0208634	0.744223	-0.0217386	0.733889	0.0447816	0.483566	0.0125767	0.84409	0.0287116	0.653401	-0.0791501	0.215132	-0.026045	0.683772	0.0281632	0.659603	-0.0665624	0.29743	-0.0295912	0.643504
joint9	SpineBase	X	The mean of amplitudes	0.464902	1.19687e-14	-0.122566	0.0543851	-0.00679231	0.915416	-0.126253	0.047469	0.0381218	0.550969	0.170861	0.00711348	0.119805	0.0600942	-0.0648555	0.310019	-0.227547	0.000311615	0.221746	0.000446167	0.0280073	0.66137	0.0144566	0.821153	-0.0234387	0.713955	-0.0447828	0.483554	-0.0482849	0.44998	-0.0456613	0.475007	-0.0299747	0.639209
joint9	SpineBase	X	The variance of amplitudes	0.284247	5.66278e-06	-0.00945516	0.882462	0.0299436	0.639557	-0.121864	0.0557917	-0.103444	0.104836	0.176557	0.0053921	0.0808287	0.205531	-0.0641977	0.314962	-0.161642	0.0109508	0.179434	0.00467362	-0.0184701	0.77271	-0.0162754	0.799104	0.0280854	0.660484	-0.0699516	0.273455	-0.017615	0.782963	-0.067476	0.290834	-0.0617784	0.333583
joint9	SpineBase	X	The standard deviation of amplitudes	0.420267	5.44905e-12	-0.0844998	0.185619	-0.0219135	0.73183	-0.127053	0.0460701	-0.0293082	0.646682	0.15785	0.0129981	0.108469	0.0889238	-0.0673749	0.291559	-0.217226	0.000586473	0.212664	0.000768551	0.0290644	0.649425	-0.0098808	0.877212	0.00359906	0.955121	-0.0690639	0.279604	-0.0518876	0.416855	-0.0524079	0.412193	-0.0361487	0.571786
joint9	SpineBase	X	The skewness of amplitudes	-0.267246	2.07684e-05	0.0396901	0.534693	-0.0247214	0.699041	0.0260458	0.683762	-0.35064	1.48206e-08	-0.0654381	0.305683	-0.089084	0.162793	-0.0103556	0.871361	0.0287912	0.652503	-0.102447	0.108244	-0.035025	0.583804	-0.16208	0.0107337	0.11253	0.0775322	-0.104939	0.0998811	-0.0897923	0.159462	-0.0332662	0.602847	-0.053553	0.40204
joint9	SpineBase	X	The kurtosis of amplitudes	-0.233139	0.000218544	0.0107769	0.866175	-0.0224314	0.725743	0.0441987	0.489282	-0.354906	9.61735e-09	-0.0649986	0.30895	-0.0932912	0.143758	-0.00397247	0.950471	0.0361399	0.571879	-0.0894996	0.160832	-0.0415871	0.515332	-0.167431	0.00837223	0.100214	0.116193	-0.0959995	0.132434	-0.0969341	0.128689	-0.03033	0.63524	-0.0533102	0.40418
joint9	SpineBase	Y	Direct current component	0.0942656	0.139601	0.0467733	0.464308	0.719451	1.1604e-40	0.015504	0.808436	-0.113402	0.0752463	-0.435148	7.81405e-13	-0.12753	0.0452518	0.0985333	0.122473	-0.0929221	0.145357	-0.0391697	0.540067	0.0216385	0.735069	0.016945	0.791026	-0.0393824	0.537866	-0.0552491	0.387278	0.0100378	0.875276	0.0333346	0.602101	0.0213217	0.738806
joint9	SpineBase	Y	The mean of phases	-0.236723	0.00017332	-0.106876	0.0937431	0.280404	7.65424e-06	0.0908445	0.15461	-0.0184063	0.773473	-0.152905	0.0161695	0.0128407	0.840861	0.00553118	0.931078	0.0131243	0.837394	-0.186658	0.00323368	0.135812	0.0328814	-0.000559621	0.993018	-0.0439984	0.491254	-0.0774596	0.225122	-0.000317949	0.996033	-0.0139859	0.826883	-0.0382115	0.550032
joint9	SpineBase	Y	The variance of phases	-0.280416	7.64725e-06	-0.112737	0.0769848	0.244229	0.000105418	0.0524874	0.411484	-0.0614094	0.336484	-0.132906	0.0368474	-0.00588761	0.926648	-0.0249195	0.696747	0.0207686	0.745345	-0.154942	0.0147894	0.161813	0.0108655	0.00875031	0.891168	-0.0657131	0.303651	-0.0452892	0.478617	0.00558983	0.930349	-0.0147626	0.817432	-0.0117321	0.854441
joint9	SpineBase	Y	The standard deviation of phases	-0.283866	5.83597e-06	-0.125672	0.0485064	0.211974	0.000800208	0.0835974	0.190377	-0.0449727	0.481699	-0.119427	0.0609128	-0.0237069	0.710828	-0.0265264	0.678249	0.0257945	0.686652	-0.157679	0.013098	0.170823	0.00712644	-0.0120793	0.850183	-0.0839018	0.188762	-0.0613022	0.337329	0.0172888	0.786886	-0.0118488	0.853009	-0.00551116	0.931327
joint9	SpineBase	Y	The skewness of phases	-0.316085	3.91341e-07	-0.0740947	0.245977	0.135176	0.0337174	-0.0526806	0.409762	-0.0802252	0.208946	-0.0715075	0.262901	0.0104607	0.870068	-0.0682444	0.285362	0.0653662	0.306216	-0.0962654	0.13136	0.176772	0.00533523	0.0124011	0.846241	-0.061768	0.333664	0.0119448	0.851831	0.0131563	0.837004	-0.0246404	0.699979	0.00234239	0.970783
joint9	SpineBase	Y	The kurtosis of phases	-0.276723	1.01729e-05	-0.0552553	0.387225	0.178968	0.00478381	-0.0604863	0.343811	-0.0874217	0.170814	-0.0938592	0.141324	0.0412592	0.518652	-0.0708392	0.267399	0.0602217	0.34593	-0.0926426	0.146576	0.169401	0.00762695	0.0347458	0.586808	-0.0500187	0.433857	0.018904	0.767521	-0.00259493	0.967634	-0.0265997	0.67741	-0.0113566	0.85905
joint9	SpineBase	Y	The mean of amplitudes	0.251938	6.22267e-05	-0.135861	0.0328179	0.660966	2.15519e-32	-0.027946	0.662065	-0.164053	0.00980211	-0.343835	2.91591e-08	-0.111742	0.0796454	0.134396	0.0347664	-0.100617	0.114724	-0.0479033	0.453574	0.0489346	0.443899	0.0368688	0.564146	-0.0145571	0.819931	-0.0993793	0.119279	-0.0729339	0.253474	0.0477855	0.454686	-0.000345165	0.995694
joint9	SpineBase	Y	The variance of amplitudes	0.270528	1.62684e-05	-0.154194	0.0152839	0.631395	7.01818e-29	-0.0726827	0.255116	-0.154538	0.0150548	-0.334803	6.9853e-08	-0.0852715	0.18162	0.115627	0.0696628	-0.0705967	0.269044	-0.00190147	0.97628	0.0554177	0.385829	0.0448289	0.483103	-0.0320669	0.615988	-0.0905398	0.156003	-0.0679448	0.287488	0.0323543	0.612827	0.0164941	0.796462
joint9	SpineBase	Y	The standard deviation of amplitudes	0.256763	4.43545e-05	-0.141101	0.0265935	0.665644	5.5071e-33	-0.0332443	0.603085	-0.181666	0.00417672	-0.341378	3.70835e-08	-0.113024	0.076231	0.133086	0.0365899	-0.0922309	0.148387	-0.0392325	0.539416	0.0389065	0.542795	0.030823	0.62975	-0.0263062	0.680774	-0.100726	0.11433	-0.0646794	0.311337	0.042629	0.504854	0.000925828	0.98845
joint9	SpineBase	Y	The skewness of amplitudes	-0.175511	0.00567678	0.109337	0.086383	0.394837	1.21606e-10	-0.0763791	0.231677	-0.198701	0.00169905	-0.0696367	0.275625	-0.10487	0.100108	-0.0150148	0.81437	0.196587	0.00190736	-0.0754397	0.237484	-0.143226	0.0243744	-0.160929	0.0113125	-0.0572956	0.369911	-0.0822834	0.197464	0.0271541	0.671075	-0.00117144	0.985386	-0.0110419	0.862917
joint9	SpineBase	Y	The kurtosis of amplitudes	-0.142938	0.0246654	0.117259	0.0657872	0.43663	6.40601e-13	-0.0737027	0.24849	-0.205523	0.00116052	-0.0890277	0.16306	-0.0852321	0.181823	-0.00424023	0.947137	0.190445	0.00265188	-0.07828	0.220233	-0.122875	0.0537733	-0.153371	0.0158445	-0.0535481	0.402083	-0.0975388	0.126311	0.0158954	0.803698	0.0142628	0.82351	-0.0174402	0.785065
joint9	SpineBase	Z	Direct current component	-0.267499	2.03829e-05	0.191264	0.00253931	0.0641258	0.315505	-0.12076	0.0580642	0.135291	0.0335654	0.130332	0.0406895	0.0640952	0.315737	-0.0508053	0.426653	-0.0426893	0.504251	-0.0930714	0.144708	0.0374829	0.557668	0.0362263	0.57096	-0.0693026	0.277941	0.0138229	0.828869	0.0200815	0.753493	-0.0543526	0.395039	-0.0235761	0.712352
joint9	SpineBase	Z	The mean of phases	-0.375212	1.12212e-09	0.0478438	0.454135	0.0878653	0.168645	-0.00997418	0.87606	0.022257	0.727791	0.0366133	0.56685	-0.0170603	0.789636	0.00474294	0.94088	0.0281694	0.659532	-0.0340414	0.594419	0.035398	0.579802	0.0223368	0.726855	-0.0413644	0.517586	-0.00446247	0.944371	0.0200481	0.75389	0.0136182	0.831365	0.0276933	0.664935
joint9	SpineBase	Z	The variance of phases	-0.266514	2.19213e-05	0.084244	0.186959	0.0863207	0.176286	-0.040429	0.527108	0.00718342	0.910566	0.00059105	0.992626	0.0447855	0.483527	-0.014428	0.821501	0.024472	0.701931	-0.0279147	0.66242	0.0473701	0.458621	0.0210987	0.74144	-0.0260283	0.683963	-0.0136812	0.830597	0.0127381	0.842116	0.000256754	0.996797	0.0127314	0.842198
joint9	SpineBase	Z	The standard deviation of phases	-0.299112	1.69197e-06	0.0545427	0.393386	0.079665	0.212153	-0.0425446	0.505698	-0.00302604	0.962261	0.0292205	0.647667	0.0283914	0.65702	-0.00760905	0.905291	0.0377743	0.554608	-0.0357782	0.575735	0.0483828	0.449061	0.0019918	0.975154	-0.0236287	0.711739	-0.0281154	0.660144	0.0249175	0.696771	0.00667515	0.91687	0.0158289	0.804503
joint9	SpineBase	Z	The skewness of phases	-0.182037	0.00409886	0.1152	0.0707078	0.0835578	0.190588	-0.0449656	0.481768	0.00629965	0.921531	-0.0337358	0.597735	0.0938224	0.14148	-0.0220936	0.729712	0.0173661	0.785956	-0.0264113	0.679568	0.0504276	0.430104	0.0281284	0.659997	-0.0223371	0.72685	-0.011794	0.853681	0.00576625	0.928156	-0.00873124	0.891403	-0.000967894	0.987925
joint9	SpineBase	Z	The kurtosis of phases	-0.157467	0.0132225	0.143094	0.024508	0.0872548	0.171635	-0.0284331	0.656547	0.0241548	0.705615	-0.0569963	0.37242	0.1098	0.0850507	-0.0201454	0.752734	0.00715379	0.910933	-0.0208903	0.743905	0.0439004	0.492222	0.0449079	0.482331	-0.0288018	0.652383	0.000926042	0.988447	-0.00381446	0.952438	-0.011336	0.859304	-0.00639605	0.920334
joint9	SpineBase	Z	The mean of amplitudes	-0.147515	0.0203772	-0.413721	1.2428e-11	-0.0226758	0.722878	-0.0908825	0.154437	-0.0697453	0.274875	0.0237524	0.710297	0.062913	0.324764	0.126638	0.0467911	0.149638	0.0186186	0.00497664	0.937973	-0.114666	0.0720315	-0.0277276	0.664545	-0.0120794	0.850181	0.00413851	0.948403	0.0341316	0.593442	0.047275	0.459524	0.0128045	0.841304
joint9	SpineBase	Z	The variance of amplitudes	-0.0516964	0.418577	-0.353979	1.05704e-08	0.00232135	0.971045	-0.165874	0.00900658	-0.116793	0.0668748	-0.00432033	0.94614	0.0971846	0.1277	0.0692076	0.278602	0.147139	0.0207034	0.022621	0.723519	-0.089867	0.159114	-0.0572329	0.370435	0.033186	0.603722	-0.0373301	0.559277	0.0237932	0.709822	0.0253762	0.691471	0.000948147	0.988171
joint9	SpineBase	Z	The standard deviation of amplitudes	-0.0976117	0.126026	-0.355629	8.93121e-09	-0.0101138	0.87434	-0.147784	0.0201467	-0.0982866	0.123416	0.0219244	0.731702	0.103554	0.104464	0.0858594	0.178617	0.157121	0.0134284	0.0150642	0.81377	-0.0802216	0.208967	-0.0552781	0.387029	0.0204438	0.749194	-0.0378078	0.554257	0.0332695	0.602811	0.0348237	0.585969	0.00310302	0.961301
joint9	SpineBase	Z	The skewness of amplitudes	-0.08341	0.191376	0.0550535	0.388964	0.0554398	0.38564	-0.0874858	0.170499	-0.0446184	0.485163	0.0700954	0.272467	0.103812	0.103596	-0.0303948	0.634518	0.0265296	0.678212	-0.020539	0.748064	0.0466672	0.465323	-0.0404177	0.527223	-0.0029093	0.963716	-0.0884313	0.165908	0.0494869	0.438767	-0.0277692	0.664072	-0.026411	0.679571
joint9	SpineBase	Z	The kurtosis of amplitudes	-0.0889216	0.163564	0.0687975	0.281467	0.0612324	0.337881	-0.0830793	0.193148	-0.0392739	0.538988	0.0551692	0.387966	0.110939	0.0818458	-0.0309459	0.628385	0.0202151	0.751907	-0.0244604	0.702066	0.0491948	0.441477	-0.0282414	0.658717	-0.00866467	0.892226	-0.0787638	0.217386	0.0482051	0.45073	-0.0290704	0.649357	-0.0255449	0.689527
joint23	AnkleRight	X	Direct current component	-0.0272978	0.669436	0.173156	0.00636827	0.157307	0.0133177	0.101976	0.109881	-0.250552	6.84974e-05	0.0681998	0.285678	-0.287907	4.23252e-06	-0.0330913	0.604755	-0.133523	0.0359728	-0.0959828	0.132501	-0.0132543	0.835807	-0.0607643	0.341594	-0.0454208	0.477338	-0.116499	0.0675699	-0.00799991	0.90045	-0.0308026	0.629977	-0.0338243	0.596773
joint23	AnkleRight	X	The mean of phases	0.312941	5.16811e-07	-0.40219	5.08924e-11	-0.196029	0.00196614	0.149909	0.018404	-0.197669	0.00179799	-0.107743	0.0910961	-0.0339158	0.595781	-0.147188	0.0206609	0.0434356	0.49682	-0.0138495	0.828545	-0.00353259	0.955949	-0.00888324	0.889525	0.123166	0.0532055	0.0252913	0.692451	-0.0150245	0.814252	-0.0456562	0.475057	-0.0300705	0.638138
joint23	AnkleRight	X	The variance of phases	0.146992	0.0208319	-0.372479	1.51161e-09	-0.267241	2.0776e-05	0.120245	0.059152	-0.156908	0.0135562	-0.131065	0.039563	-0.0442982	0.488303	-0.13677	0.0316569	0.0519666	0.416146	-0.00228457	0.971503	-0.0321159	0.615449	0.0275243	0.666857	0.103873	0.103392	0.0410388	0.52089	-0.0357867	0.575645	-0.0456587	0.475032	0.0112411	0.86047
joint23	AnkleRight	X	The standard deviation of phases	0.141179	0.0265087	-0.364454	3.56816e-09	-0.261199	3.22981e-05	0.122623	0.054272	-0.154991	0.0147576	-0.125008	0.0497166	-0.0310769	0.62693	-0.138459	0.0295919	0.0379778	0.552476	0.00206098	0.974291	-0.0278577	0.663067	0.029009	0.650049	0.0887427	0.164416	0.0500127	0.433913	-0.045842	0.47326	-0.0426937	0.504207	0.0042257	0.947318
joint23	AnkleRight	X	The skewness of phases	-0.0707965	0.267688	-0.163862	0.00988889	-0.209212	0.000939553	0.080186	0.209169	-0.0395541	0.536094	-0.110776	0.0822989	-0.0265518	0.677959	-0.0862952	0.176414	0.0256979	0.687764	0.00599015	0.925375	-0.0538635	0.399312	0.0610999	0.338929	0.0440004	0.491234	0.0437758	0.493452	-0.0387681	0.544232	-0.0377008	0.555379	0.0503702	0.43063
joint23	AnkleRight	X	The kurtosis of phases	-0.0467118	0.464896	-0.116976	0.0664464	-0.182133	0.00407895	0.0789684	0.21619	-0.0316898	0.620147	-0.113883	0.0740099	-0.0111223	0.861929	-0.0775269	0.224718	0.0257781	0.686841	-0.00343751	0.957134	-0.0515406	0.419983	0.0632293	0.322332	0.0530769	0.406243	0.0372852	0.55975	-0.0263634	0.680117	-0.0307634	0.630412	0.0526207	0.410295
joint23	AnkleRight	X	The mean of amplitudes	0.588714	1.97013e-24	-0.469964	5.64104e-15	-0.0843297	0.186509	-0.027127	0.671384	0.0768918	0.22855	-0.0868745	0.173517	0.131607	0.038746	-0.112706	0.0770675	-0.0568725	0.373461	0.00850245	0.894232	0.0747688	0.241694	-0.0231321	0.717536	0.0688622	0.281013	0.0892883	0.161827	0.029557	0.643888	0.00185179	0.9769	-0.0270276	0.672518
joint23	AnkleRight	X	The variance of amplitudes	0.39182	1.72775e-10	-0.350538	1.49741e-08	0.0453696	0.477836	-0.207575	0.00103234	0.320628	2.60318e-07	0.0332642	0.602868	0.11934	0.0611024	-0.0788723	0.216752	-0.121233	0.057081	-0.0257351	0.687335	0.121079	0.0574007	-0.0373293	0.559285	-0.0229323	0.719873	0.0962332	0.13149	-0.00976649	0.878621	0.0587336	0.358	0.010159	0.873783
joint23	AnkleRight	X	The standard deviation of amplitudes	0.401336	5.63705e-11	-0.374387	1.22811e-09	-0.0195405	0.759929	-0.224837	0.000368913	0.298512	1.77887e-06	4.72602e-06	0.999941	0.165056	0.0093565	-0.0486425	0.446627	-0.142195	0.0254304	0.0277098	0.664748	0.106772	0.0940649	-0.00850044	0.894257	-0.034776	0.586483	0.0971161	0.12797	-0.000876553	0.989064	0.0378608	0.553701	0.0183362	0.774312
joint23	AnkleRight	X	The skewness of amplitudes	-0.509947	9.37708e-18	0.365598	3.16154e-09	-0.0121191	0.849695	-0.334457	7.21897e-08	0.126729	0.0466322	0.200372	0.00154936	0.0227349	0.722184	0.118992	0.061866	-0.116762	0.0669477	0.0531835	0.4053	-0.0397131	0.534455	0.00708782	0.911751	-0.0793204	0.214143	0.0312078	0.625479	0.0307573	0.63048	-0.0216447	0.734996	0.0627154	0.326288
joint23	AnkleRight	X	The kurtosis of amplitudes	-0.482925	7.75914e-16	0.363553	3.92346e-09	0.00780642	0.902846	-0.339624	4.39714e-08	0.123573	0.0524172	0.205859	0.0011386	0.0194851	0.760588	0.116718	0.0670522	-0.122237	0.0550397	0.0561635	0.379458	-0.0354634	0.579101	0.0042578	0.946918	-0.0682205	0.285531	0.0310387	0.627355	0.0486928	0.446157	-0.0281093	0.660213	0.0548988	0.390299
joint23	AnkleRight	Y	Direct current component	-0.300318	1.52933e-06	-0.0622331	0.33003	-0.0374332	0.558191	-0.161473	0.0110353	0.00127336	0.984114	-0.0412346	0.518901	0.134139	0.0351172	0.00107941	0.986534	0.0526823	0.409746	0.0364634	0.568441	0.0227041	0.722546	0.0696518	0.275521	-0.00358711	0.95527	-0.0275467	0.666602	-0.00938463	0.883332	-0.0650108	0.308859	-0.0624503	0.328341
joint23	AnkleRight	Y	The mean of phases	-0.0479347	0.453277	-0.00123547	0.984587	-0.222727	0.000420159	-0.0152716	0.811255	0.132891	0.0368679	0.250974	6.65254e-05	0.121788	0.0559447	-0.111372	0.0806527	-0.0155274	0.808154	-0.244994	0.000100118	0.166612	0.00870094	0.16901	0.00777	0.196238	0.00194401	-0.0359853	0.573526	-0.055181	0.387865	-0.0702606	0.271336	-0.101149	0.11281
joint23	AnkleRight	Y	The variance of phases	0.00931473	0.884195	0.0950189	0.136452	-0.108536	0.0887247	-0.0265571	0.677898	0.140125	0.0276696	0.261893	3.07179e-05	0.0965097	0.130379	-0.118122	0.0638096	-0.0211012	0.741411	-0.289327	3.77635e-06	0.094323	0.139359	0.165721	0.00907119	0.196831	0.00188223	-0.0279709	0.661782	-0.039829	0.533262	-0.0622907	0.329582	-0.0653643	0.306231
joint23	AnkleRight	Y	The standard deviation of phases	-0.0163632	0.798043	0.0588196	0.357296	-0.104018	0.10291	-0.0217861	0.73333	0.131188	0.0393754	0.26798	1.96701e-05	0.0885323	0.165423	-0.128051	0.044373	-0.00695398	0.913411	-0.289586	3.69836e-06	0.112767	0.0769053	0.152534	0.0164327	0.198938	0.00167705	-0.0453151	0.478365	-0.0412489	0.518757	-0.0710859	0.265733	-0.075264	0.238582
joint23	AnkleRight	Y	The skewness of phases	-0.00240447	0.970009	0.14142	0.0262502	-0.073261	0.251345	-0.0144404	0.82135	0.102582	0.107775	0.164782	0.00947636	0.0577926	0.365767	-0.094235	0.13973	-0.00736314	0.908338	-0.234837	0.000195902	0.0293732	0.645951	0.12262	0.0542779	0.132169	0.0379148	-0.0059245	0.92619	-0.0204471	0.749154	-0.0334635	0.600697	-0.013535	0.83238
joint23	AnkleRight	Y	The kurtosis of phases	0.0102673	0.872449	0.187238	0.00313768	-0.0803244	0.208382	-0.0038882	0.95152	0.113423	0.0751927	0.141241	0.026442	0.0748409	0.241239	-0.0744406	0.243773	-0.0256958	0.687788	-0.206368	0.00110606	0.015045	0.814003	0.129735	0.0416274	0.111079	0.0814583	0.0131269	0.837363	-0.0126082	0.843705	-0.0267116	0.676129	-0.0135164	0.832608
joint23	AnkleRight	Y	The mean of amplitudes	0.466134	9.97772e-15	-0.056273	0.378528	0.464558	1.25906e-14	-0.159973	0.0118138	0.123139	0.0532579	0.311575	5.8265e-07	-0.0721095	0.258893	-0.0438421	0.492797	0.0231112	0.71778	-0.255189	4.95697e-05	0.0980873	0.124182	-0.0114985	0.857308	0.0825761	0.195869	0.0534143	0.403262	-0.0371996	0.560652	0.0153481	0.810326	-0.0336632	0.598524
joint23	AnkleRight	Y	The variance of amplitudes	0.353934	1.06186e-08	-0.0588281	0.357226	0.430629	1.42359e-12	-0.148347	0.019672	0.213864	0.000716145	0.318121	3.26272e-07	-0.144113	0.0234964	-0.074507	0.243351	0.024461	0.702059	-0.194653	0.00211816	0.0822444	0.197677	-0.0892873	0.161832	0.0439645	0.491589	0.0307066	0.631044	-0.046248	0.469345	-0.0124365	0.845807	-0.00632528	0.921213
joint23	AnkleRight	Y	The standard deviation of amplitudes	0.440292	3.90477e-13	-0.0283854	0.657087	0.562433	5.26957e-22	-0.143499	0.0241018	0.113828	0.0741522	0.22879	0.000288198	-0.119841	0.0600158	0.00167881	0.979057	0.0165623	0.79564	-0.172985	0.00642133	0.0359354	0.574058	-0.0421474	0.509683	0.0405442	0.52593	0.0731274	0.252213	-0.0324222	0.612082	0.03426	0.592053	-0.0119926	0.851246
joint23	AnkleRight	Y	The skewness of amplitudes	-0.0918483	0.150085	0.167659	0.00828287	0.193232	0.00228634	0.115197	0.0707156	0.0738762	0.247375	-0.0693094	0.277894	-0.186497	0.00326077	0.0642942	0.314234	-0.0895352	0.160665	0.164392	0.00964915	-0.0868593	0.173593	0.0436172	0.495021	0.0685604	0.283132	0.0981767	0.123838	-0.0165004	0.796387	-0.0789952	0.216034	-0.0897729	0.159553
joint23	AnkleRight	Y	The kurtosis of amplitudes	-0.080318	0.208418	0.187186	0.00314616	0.14378	0.0238234	0.122988	0.0535534	0.0951831	0.135773	-0.059006	0.355771	-0.170977	0.00707387	0.0596392	0.350624	-0.100777	0.114147	0.177547	0.00513444	-0.0796201	0.212412	0.0649766	0.309114	0.0656856	0.303854	0.111152	0.0812577	-0.0127019	0.842559	-0.0796469	0.212257	-0.0911777	0.153097
joint23	AnkleRight	Z	Direct current component	0.17652	0.00540202	-0.082404	0.196805	0.601297	1.12755e-25	0.0925878	0.146816	-0.104496	0.101329	-0.269719	1.72833e-05	-0.146001	0.0217184	0.0158093	0.80474	-0.0702994	0.271071	-0.0848663	0.183712	-0.00744947	0.907268	-0.0379825	0.552427	0.00739752	0.907912	-0.0782564	0.220373	-0.0334135	0.601242	-0.059957	0.348058	-0.0520032	0.415817
joint23	AnkleRight	Z	The mean of phases	0.314384	4.55057e-07	-0.136847	0.0315599	0.268625	1.87498e-05	0.0142198	0.824035	0.0960072	0.132402	0.0690571	0.279651	0.174184	0.0060576	-0.296301	2.13738e-06	-0.0382724	0.549395	-0.0724268	0.256798	-0.00259471	0.967637	-0.0377112	0.55527	-0.0562567	0.378666	-0.0108651	0.865091	0.0584145	0.360622	-0.0186214	0.770899	0.00604738	0.924664
joint23	AnkleRight	Z	The variance of phases	0.258613	3.88845e-05	-0.117082	0.0661986	0.256357	4.56479e-05	0.000591168	0.992625	0.0906252	0.155612	0.0332768	0.602732	0.199253	0.00164816	-0.30071	1.47987e-06	-0.0412507	0.518738	-0.0656166	0.304363	-0.00193103	0.975912	-0.031764	0.619327	-0.0612353	0.337858	-0.00517803	0.935468	0.0653686	0.306199	0.0097298	0.879074	-0.00729004	0.909244
joint23	AnkleRight	Z	The standard deviation of phases	0.271446	1.51862e-05	-0.106835	0.0938713	0.242442	0.000118837	0.000218568	0.997273	0.0946839	0.137846	0.0452081	0.479406	0.193822	0.00221506	-0.294132	2.55548e-06	-0.0373922	0.558623	-0.0783858	0.219609	-0.0163891	0.79773	-0.0487869	0.445277	-0.0650841	0.308312	-0.00164036	0.979537	0.0707476	0.26802	0.0176808	0.782173	0.0141763	0.824564
joint23	AnkleRight	Z	The skewness of phases	0.153756	0.01558	-0.045504	0.476531	0.236676	0.000173845	-0.0151544	0.812676	0.0870976	0.172411	-0.0205948	0.747403	0.205481	0.0011633	-0.260652	3.35972e-05	-0.0234203	0.71417	-0.0639386	0.316923	0.0178886	0.779679	-0.0204761	0.74881	-0.0516881	0.418651	0.011047	0.862854	0.0708533	0.267304	0.0415457	0.51575	-0.00905229	0.887436
joint23	AnkleRight	Z	The kurtosis of phases	0.11462	0.0721478	-0.0017605	0.978039	0.232385	0.000229379	-0.0176029	0.78311	0.0839675	0.188415	-0.0462888	0.468953	0.213389	0.000736481	-0.23129	0.000245979	-0.0177208	0.781693	-0.0569748	0.372601	0.0300679	0.638167	0.00355894	0.955621	-0.0450425	0.481018	0.0148539	0.816324	0.0579795	0.364216	0.0317114	0.619908	-0.0185726	0.771483
joint23	AnkleRight	Z	The mean of amplitudes	0.313663	4.84999e-07	-0.237755	0.000162013	0.145164	0.0224917	-0.0516004	0.419442	0.00862516	0.892715	0.0139681	0.827099	0.256438	4.53856e-05	-0.220527	0.000480579	-0.00407903	0.949144	-0.031757	0.619404	-0.100158	0.1164	0.0267433	0.675767	-0.0666075	0.297103	0.0176188	0.782919	0.0336958	0.59817	-0.0122917	0.84758	-0.020337	0.75046
joint23	AnkleRight	Z	The variance of amplitudes	-0.326985	1.45502e-07	-0.206405	0.00110374	-0.343018	3.15947e-08	-0.264514	2.53876e-05	-0.14519	0.0224678	-0.0654873	0.305319	0.129967	0.0412608	0.206535	0.00109557	0.10052	0.115076	0.0581181	0.363069	-0.134032	0.0352652	0.0354435	0.579314	-0.0194451	0.761065	0.000337977	0.995783	0.0181471	0.776579	-0.0116676	0.855232	-0.0320954	0.615675
joint23	AnkleRight	Z	The standard deviation of amplitudes	-0.340923	3.87651e-08	-0.202267	0.00139417	-0.346436	2.25576e-08	-0.244296	0.000104945	-0.15661	0.0137374	-0.0623784	0.3289	0.13674	0.0316946	0.211531	0.000821199	0.108003	0.0903124	0.0625377	0.327664	-0.126565	0.0469181	0.0369372	0.563422	-0.0288933	0.651352	-0.00627225	0.921871	0.0260197	0.684062	0.00281335	0.964912	-0.0307614	0.630435
joint23	AnkleRight	Z	The skewness of amplitudes	-0.461039	2.10749e-14	0.150217	0.0181627	-0.239169	0.000147645	-0.0607074	0.342047	-0.0806657	0.206449	-0.0259528	0.684831	-0.121193	0.057165	0.239989	0.000139869	0.0419554	0.511615	0.0483567	0.449306	0.0505246	0.429216	-0.00893118	0.888932	-0.0443295	0.487996	-0.0766955	0.229744	0.0197101	0.757909	-0.0347598	0.586657	0.0217526	0.733724
joint23	AnkleRight	Z	The kurtosis of amplitudes	-0.483287	7.33276e-16	0.167764	0.0082419	-0.230145	0.000264538	-0.0697196	0.275053	-0.0743349	0.244444	-0.0267591	0.675586	-0.121583	0.056363	0.234515	0.000200012	0.0379986	0.552258	0.042422	0.506927	0.0522133	0.413934	-0.00296267	0.96305	-0.0554932	0.385181	-0.0746128	0.242681	0.0139657	0.827129	-0.0382053	0.550096	0.0258198	0.686361
joint22	AnkleLeft	X	Direct current component	0.104579	0.101056	-0.303808	1.13875e-06	-0.0773409	0.225835	-0.412803	1.39324e-11	0.339329	4.52473e-08	0.0304229	0.634204	0.112777	0.0768787	0.00755123	0.906007	-0.127892	0.0446387	0.0386387	0.545577	0.101769	0.110611	-0.081985	0.199099	0.0427736	0.503408	-0.00230899	0.971199	0.112327	0.0780717	-0.0375469	0.556996	0.0332888	0.6026
joint22	AnkleLeft	X	The mean of phases	0.11115	0.0812642	-0.163386	0.0101085	0.0933467	0.143519	0.138221	0.0298766	-0.0184336	0.773147	-0.226065	0.000341837	0.155428	0.0144761	-0.060459	0.344029	0.290962	3.30895e-06	-0.318952	3.02795e-07	-0.292295	2.96932e-06	-0.0771564	0.226948	0.0482455	0.45035	0.0566955	0.374953	0.0979233	0.124816	-0.0627495	0.326025	-0.00887868	0.889581
joint22	AnkleLeft	X	The variance of phases	-0.0114143	0.858341	-0.11651	0.0675443	-0.013613	0.831429	0.061161	0.338446	0.0273718	0.668593	-0.18425	0.00366134	0.174808	0.00587589	-0.0845591	0.185309	0.259835	3.5629e-05	-0.319695	2.83207e-07	-0.28711	4.51118e-06	-0.0684652	0.283803	0.0356409	0.577201	0.0439525	0.491707	0.0793692	0.213861	-0.00199466	0.975118	0.00842091	0.895241
joint22	AnkleLeft	X	The standard deviation of phases	-0.00961882	0.880442	-0.130655	0.0401903	-0.0135929	0.831674	0.0604049	0.344462	0.0329555	0.606239	-0.174903	0.00584849	0.181897	0.00412817	-0.0536123	0.401518	0.254572	5.17661e-05	-0.33198	9.12627e-08	-0.299785	1.59926e-06	-0.087861	0.168666	0.0280029	0.66142	0.0291784	0.648142	0.101673	0.11095	-0.00811127	0.899072	0.0220676	0.730017
joint22	AnkleLeft	X	The skewness of phases	-0.132961	0.0367688	-0.0104504	0.870194	-0.0364738	0.56833	-0.0226152	0.723588	0.0609065	0.340463	-0.128565	0.0435183	0.179875	0.00457132	-0.0689315	0.280529	0.157857	0.0129945	-0.276802	1.01114e-05	-0.189904	0.00272866	-0.0338956	0.596	-0.00428297	0.946605	0.00884353	0.890015	0.0419416	0.511754	0.0238019	0.70972	0.0227665	0.721815
joint22	AnkleLeft	X	The kurtosis of phases	-0.113731	0.0744005	0.0358933	0.574506	-0.0154969	0.808523	-0.00681587	0.915124	0.0610605	0.339242	-0.139347	0.0285535	0.179836	0.0045802	-0.0739351	0.246998	0.141684	0.0259677	-0.235637	0.000186001	-0.154317	0.0152015	-0.0088112	0.890415	-0.0108984	0.864682	0.0194248	0.761307	0.0208038	0.744928	0.0157768	0.805132	0.006377	0.920571
joint22	AnkleLeft	X	The mean of amplitudes	0.610392	1.31644e-26	-0.367457	2.59436e-09	0.191358	0.00252659	-0.124619	0.0504374	0.187264	0.00313344	-0.150058	0.0182869	0.129557	0.0419109	-0.114714	0.0719114	0.117361	0.0655496	0.0843509	0.186398	-0.086174	0.177025	-0.0727281	0.254819	-0.0584978	0.359936	-0.00977998	0.878455	0.0437683	0.493526	-0.0792375	0.214624	-0.000154825	0.998068
joint22	AnkleLeft	X	The variance of amplitudes	0.49544	1.05368e-16	-0.230092	0.000265435	0.183602	0.00378497	-0.269177	1.79955e-05	0.25435	5.25808e-05	0.0367897	0.564982	0.0823609	0.19704	-0.165966	0.00896804	0.00541607	0.932509	0.208606	0.000972975	0.0600357	0.347425	-0.0961261	0.131921	-0.0691037	0.279326	-0.0756997	0.235867	0.0276889	0.664985	-0.00531575	0.933756	0.000772881	0.990358
joint22	AnkleLeft	X	The standard deviation of amplitudes	0.486355	4.52591e-16	-0.270634	1.61401e-05	0.113764	0.0743135	-0.299996	1.57125e-06	0.22254	0.000425002	0.0072271	0.910024	0.137453	0.0308076	-0.13269	0.0371571	0.0142883	0.823201	0.219931	0.000498284	0.0435991	0.495199	-0.0647914	0.310498	-0.065536	0.304959	-0.0596672	0.350397	0.0218584	0.732479	0.00872591	0.891469	0.00448763	0.944057
joint22	AnkleLeft	X	The skewness of amplitudes	-0.439746	4.20556e-13	0.294072	2.56808e-06	-0.0841792	0.187299	-0.264995	2.45096e-05	-0.0326232	0.609877	0.271569	1.50461e-05	0.0841627	0.187386	-0.0697301	0.27498	-0.0192304	0.763625	0.077786	0.223168	0.0951023	0.136106	0.0788384	0.216949	0.0932921	0.143754	-0.0842981	0.186675	0.067527	0.290469	0.0566229	0.375566	0.0111882	0.861119
joint22	AnkleLeft	X	The kurtosis of amplitudes	-0.433983	9.12941e-13	0.294218	2.53749e-06	-0.0424061	0.507086	-0.28129	7.14313e-06	-0.0485371	0.447614	0.253965	5.40177e-05	0.0882317	0.166869	-0.0733428	0.250815	-0.00748689	0.906804	0.0695338	0.276337	0.108268	0.0895219	0.0778993	0.222492	0.0858464	0.178683	-0.0844076	0.186101	0.0893852	0.16137	0.0303862	0.634613	0.0123711	0.846608
joint22	AnkleLeft	Y	Direct current component	-0.293001	2.8032e-06	-0.0559812	0.38101	-0.0585454	0.359545	-0.165354	0.0092274	7.65912e-05	0.999044	-0.0119647	0.851588	0.135361	0.0334725	0.00502699	0.937347	0.0636086	0.319432	0.0124383	0.845784	0.0315307	0.621904	0.0717774	0.261099	0.0165297	0.796033	-0.0236572	0.711406	-0.0291282	0.648706	-0.0441038	0.490215	-0.0693938	0.277308
joint22	AnkleLeft	Y	The mean of phases	-0.0148719	0.816105	-0.0236878	0.711049	-0.0521238	0.414735	-0.0177313	0.781567	-0.10089	0.113738	0.188537	0.00293195	-0.0358853	0.574592	-0.00240992	0.969941	0.196975	0.00186754	0.0603511	0.344892	-0.0651844	0.307566	-0.070788	0.267746	-0.102007	0.109774	-0.0685864	0.28295	0.00638604	0.920458	0.096762	0.129373	-0.0199403	0.755171
joint22	AnkleLeft	Y	The variance of phases	0.0330027	0.605723	0.0526377	0.410143	0.0785123	0.218863	-0.0579165	0.364739	-0.0306376	0.631812	0.112615	0.0773076	-0.0495539	0.438147	0.00313563	0.960895	0.111974	0.0790174	0.0457236	0.474404	-0.0997032	0.118075	-0.0466571	0.465419	-0.0905519	0.155948	-0.0959705	0.132551	-0.0086351	0.892592	0.0637746	0.318169	-0.00199061	0.975169
joint22	AnkleLeft	Y	The standard deviation of phases	0.00941412	0.882968	0.0227768	0.721694	0.0767662	0.229313	-0.0683507	0.284611	-0.0541195	0.397072	0.111669	0.0798427	-0.0544693	0.394024	0.00507189	0.936788	0.13022	0.0408646	0.0335027	0.60027	-0.0937821	0.141652	-0.0588262	0.357241	-0.0732863	0.251181	-0.0875609	0.170131	-0.00762222	0.905127	0.0670341	0.294012	-0.0158568	0.804165
joint22	AnkleLeft	Y	The skewness of phases	-0.0417655	0.51353	0.116878	0.0666755	0.0814009	0.202329	-0.0673825	0.291504	0.0303129	0.63543	0.00564609	0.929649	-0.00141925	0.982295	-0.00989818	0.876997	0.0209904	0.74272	0.0204482	0.749142	-0.0921948	0.148547	0.00467371	0.941742	-0.0458378	0.4733	-0.102834	0.106908	-0.0274942	0.6672	0.0474204	0.458143	0.00412562	0.948564
joint22	AnkleLeft	Y	The kurtosis of phases	-0.0292362	0.647492	0.162553	0.0105032	0.0789909	0.216059	-0.0426818	0.504325	0.0644598	0.312986	-0.00779359	0.903005	0.030662	0.631541	-0.00550074	0.931456	0.0036036	0.955065	0.0265158	0.67837	-0.0986115	0.122175	0.0341887	0.592823	-0.0598671	0.348783	-0.0964356	0.130676	-0.0332042	0.603523	0.0427859	0.503285	0.0130864	0.837858
joint22	AnkleLeft	Y	The mean of amplitudes	0.432171	1.16124e-12	-0.0713594	0.263893	0.554215	2.73736e-21	-0.160006	0.0117964	0.128299	0.0439594	0.0903187	0.157021	-0.0969611	0.128582	-0.0356952	0.576621	0.060904	0.340483	0.061586	0.335093	-0.101458	0.111709	0.00239262	0.970156	-0.052696	0.409624	-0.0106888	0.86726	0.0118917	0.852483	-0.0239854	0.707585	0.0397952	0.53361
joint22	AnkleLeft	Y	The variance of amplitudes	0.329331	1.17003e-07	-0.0918113	0.15025	0.50946	1.01909e-17	-0.167636	0.0082917	0.257071	4.33938e-05	0.188267	0.00297368	-0.146077	0.0216494	-0.0859043	0.178389	0.0191875	0.764136	-0.0681439	0.286074	0.0126137	0.843638	-0.078971	0.216175	-0.00319342	0.960175	-0.0227184	0.722378	0.0141812	0.824504	-0.0550917	0.388634	0.0236103	0.711953
joint22	AnkleLeft	Y	The standard deviation of amplitudes	0.388276	2.59835e-10	-0.079642	0.212285	0.640779	5.93124e-30	-0.172854	0.00646212	0.223788	0.000393619	0.0468351	0.463718	-0.122251	0.0550123	-0.00375784	0.953144	-0.00177652	0.977839	-0.0106286	0.868	-0.0396817	0.534779	-0.0199645	0.754884	-0.00104152	0.987006	-0.00027282	0.996596	0.008817	0.890343	-0.0302055	0.63663	0.0397493	0.534083
joint22	AnkleLeft	Y	The skewness of amplitudes	-0.0457369	0.474276	-0.00744511	0.907322	0.288119	4.16126e-06	-0.0427537	0.503607	0.149785	0.0185015	-0.0816312	0.201051	-0.197013	0.00186368	0.183343	0.00383543	-0.137412	0.0308588	0.034369	0.590874	-0.0488611	0.444585	0.000145127	0.998189	-0.00114335	0.985736	0.051139	0.423618	-0.0116155	0.855872	0.0501176	0.432948	0.11221	0.0783849
joint22	AnkleLeft	Y	The kurtosis of amplitudes	-0.0272036	0.67051	0.0127708	0.841717	0.290036	3.56656e-06	-0.0223859	0.726278	0.153488	0.0157635	-0.0700484	0.27279	-0.195891	0.00198099	0.165001	0.00938023	-0.13616	0.0324323	0.050665	0.427934	-0.0459559	0.47216	0.0142522	0.82364	-0.00428108	0.946628	0.0503781	0.430557	-0.020241	0.7516	0.0515112	0.420248	0.125665	0.0485192
joint22	AnkleLeft	Z	Direct current component	0.168017	0.00814429	-0.0306886	0.631245	0.696903	3.08042e-37	-0.000319751	0.996011	-0.0452438	0.479058	-0.33896	4.68886e-08	-0.172562	0.00655418	0.0770246	0.227744	-0.119926	0.0598329	0.0040906	0.949	0.0283628	0.657343	-0.00479544	0.940227	0.00834503	0.896179	-0.0426235	0.504909	-0.0185498	0.771756	-0.135108	0.0338081	0.00906309	0.887303
joint22	AnkleLeft	Z	The mean of phases	0.226904	0.000324401	-0.0992076	0.119922	0.524959	6.77543e-19	0.0153231	0.81063	-0.187855	0.00303833	-0.163312	0.010143	-0.177867	0.00505345	-0.0534973	0.402531	0.186742	0.00321959	0.10568	0.0974972	-0.0447085	0.48428	0.112019	0.0788959	0.053983	0.398266	-0.00592603	0.926171	0.0245022	0.701581	-0.00870215	0.891763	-0.0369489	0.563298
joint22	AnkleLeft	Z	The variance of phases	0.117625	0.0649414	-0.0863457	0.17616	0.431922	1.20024e-12	0.0245481	0.701049	-0.23045	0.00025948	-0.206568	0.00109351	-0.145004	0.0226419	-0.0945492	0.138409	0.202988	0.00133904	0.0963796	0.130901	-0.0499702	0.434304	0.112084	0.0787218	0.058961	0.356139	0.0321846	0.614694	0.0186882	0.7701	-0.0150572	0.813856	-0.0259755	0.68457
joint22	AnkleLeft	Z	The standard deviation of phases	0.102589	0.107751	-0.0689494	0.280403	0.425531	2.77117e-12	0.041452	0.516698	-0.235853	0.000183418	-0.185018	0.00351972	-0.174693	0.00590888	-0.107036	0.0932518	0.215728	0.000641305	0.108501	0.0888291	-0.0706205	0.268883	0.0925286	0.147076	0.0747572	0.241767	0.0573271	0.369647	0.013726	0.83005	-0.0282929	0.658134	-0.0174453	0.785004
joint22	AnkleLeft	Z	The skewness of phases	0.0190982	0.765202	-0.0637217	0.318571	0.349661	1.63521e-08	0.0271618	0.670987	-0.224921	0.000367001	-0.207249	0.00105179	-0.0969344	0.128688	-0.1203	0.0590351	0.205052	0.00119196	0.0790568	0.215675	-0.0254412	0.690722	0.1119	0.0792184	0.0666781	0.296589	0.0598058	0.349277	0.0176949	0.782005	-0.0246983	0.699309	-0.0272045	0.6705
joint22	AnkleLeft	Z	The kurtosis of phases	-0.00702379	0.912545	-0.0550295	0.389171	0.326692	1.49507e-07	0.020024	0.754176	-0.199808	0.00159849	-0.209634	0.000916918	-0.0456964	0.474668	-0.121436	0.0566632	0.197038	0.00186105	0.0626593	0.326723	0.00239476	0.97013	0.120932	0.0577063	0.0587275	0.358051	0.062529	0.327732	0.0148853	0.815943	-0.0314941	0.622309	-0.0355089	0.578613
joint22	AnkleLeft	Z	The mean of amplitudes	0.540954	3.55796e-20	-0.303948	1.12535e-06	0.364466	3.56367e-09	-0.243203	0.000112937	-0.124661	0.0503595	-0.16003	0.0117833	0.0879635	0.168168	-0.00886818	0.889711	0.092903	0.14544	0.0822897	0.197429	-0.123534	0.0524925	0.144951	0.0226921	-0.0149359	0.815328	0.0184368	0.773108	0.00513339	0.936023	-0.0600592	0.347236	0.0134084	0.833925
joint22	AnkleLeft	Z	The variance of amplitudes	-0.11272	0.0770287	-0.306575	8.98893e-07	-0.275781	1.09333e-05	-0.266609	2.17686e-05	-0.111766	0.0795803	-0.0531586	0.40552	0.196703	0.00189537	0.0537711	0.400123	0.0638442	0.31764	-0.0155068	0.808403	-0.156702	0.0136813	0.0562515	0.37871	-0.0308601	0.629338	0.0708156	0.267559	-0.00330749	0.958754	0.0227027	0.722562	0.00797938	0.900704
joint22	AnkleLeft	Z	The standard deviation of amplitudes	-0.132222	0.0378363	-0.30746	8.33002e-07	-0.291865	3.07506e-06	-0.26303	2.82882e-05	-0.111076	0.0814658	-0.0505355	0.429116	0.208098	0.00100181	0.0672182	0.292686	0.0676684	0.289458	-0.0241901	0.705205	-0.149362	0.0188393	0.0600366	0.347418	-0.026617	0.677212	0.0774671	0.225077	-0.00709904	0.911612	0.0341987	0.592716	0.0135961	0.831635
joint22	AnkleLeft	Z	The skewness of amplitudes	-0.652258	2.56281e-31	0.0869343	0.17322	-0.35301	1.16651e-08	0.0993645	0.119335	0.00150105	0.981274	0.00791697	0.901477	-0.0366489	0.566473	0.0761381	0.233157	0.0299171	0.639853	-0.0115133	0.857126	0.0210019	0.742585	-0.0472311	0.459942	-0.00137412	0.982858	-0.000516785	0.993553	0.010943	0.864134	0.126083	0.0477697	-0.0195369	0.759971
joint22	AnkleLeft	Z	The kurtosis of amplitudes	-0.643459	2.88259e-30	0.0961674	0.131755	-0.31487	4.3592e-07	0.0721768	0.258448	0.00275972	0.96558	-0.00245255	0.969409	-0.0406986	0.524354	0.0603582	0.344836	0.0249555	0.696331	-0.0117794	0.85386	0.0252155	0.693326	-0.039576	0.535868	-0.00593582	0.926049	-0.00233743	0.970844	0.00310479	0.961279	0.109581	0.0856805	-0.0179009	0.779531
joint7	ElbowLeft	X	Direct current component	-0.270865	1.58637e-05	-0.315215	4.22755e-07	0.0288358	0.652	-0.301191	1.42117e-06	-0.15103	0.0175387	0.0375446	0.55702	-0.0231395	0.71745	-0.160157	0.0117157	0.0407675	0.523652	0.0336018	0.599192	0.0710844	0.265743	0.0778176	0.222979	0.0490834	0.442513	-0.0145125	0.820473	0.0378645	0.553663	0.0553867	0.386095	-0.00923368	0.885196
joint7	ElbowLeft	X	The mean of phases	0.248092	8.11138e-05	-0.0309445	0.6284	0.0209438	0.743272	0.274107	1.24206e-05	-0.193274	0.00228118	0.163541	0.0100364	-0.159022	0.0123323	-0.0955214	0.134381	0.118568	0.0628068	0.164208	0.00973211	-0.0869369	0.173207	-0.0130255	0.838602	-0.00106143	0.986758	-0.102093	0.109475	0.010939	0.864182	-0.0249885	0.695949	-0.0231996	0.716748
joint7	ElbowLeft	X	The variance of phases	0.143379	0.0242207	-0.0130295	0.838553	-0.0229255	0.719952	0.26831	1.91939e-05	-0.131105	0.0395025	0.139475	0.0284063	-0.144878	0.0227613	-0.0564923	0.37667	0.0755666	0.236694	0.155378	0.014508	-0.108217	0.089672	0.00482032	0.939918	-0.0390671	0.541129	-0.0699779	0.273274	-0.00437825	0.945419	-0.0268483	0.674566	-0.00921287	0.885453
joint7	ElbowLeft	X	The standard deviation of phases	0.115739	0.0693919	-0.0305189	0.633134	-0.0104428	0.870288	0.280492	7.60219e-06	-0.13586	0.03282	0.139938	0.0278798	-0.161263	0.0111414	-0.0521072	0.414884	0.0705601	0.269294	0.152864	0.0161986	-0.0966808	0.129696	-0.017541	0.783854	-0.0443242	0.488048	-0.0774261	0.225323	-0.0161388	0.800754	-0.0359352	0.57406	-0.0159833	0.802634
joint7	ElbowLeft	X	The skewness of phases	-0.0197358	0.757603	0.0301492	0.637259	0.00652608	0.91872	0.186791	0.00321152	-0.0611709	0.338367	0.045112	0.480342	-0.0339137	0.595803	0.00225814	0.971833	0.015186	0.812292	0.0901338	0.157875	-0.0533317	0.403991	0.0275584	0.666469	-0.0802267	0.208938	-0.0467089	0.464924	-0.0350413	0.583629	-0.0227845	0.721603	0.00567305	0.929314
joint7	ElbowLeft	X	The kurtosis of phases	0.00268178	0.966552	0.0831826	0.192594	0.0180408	0.777853	0.166044	0.00893503	-0.0359827	0.573553	0.0170344	0.789949	0.0111514	0.861571	-0.00336394	0.95805	0.00817082	0.898335	0.0801825	0.209189	-0.0532703	0.404533	0.0502047	0.432147	-0.0640428	0.316133	-0.0322401	0.614083	-0.0259027	0.685407	-0.0135755	0.831886	0.00496387	0.938132
joint7	ElbowLeft	X	The mean of amplitudes	0.632431	5.36472e-29	0.0783982	0.219535	-0.264606	2.52178e-05	0.150928	0.017616	-0.136887	0.0315097	-0.0053587	0.933222	-0.0315185	0.62204	0.121068	0.0574226	-0.00519088	0.935308	-0.0584569	0.360274	-0.0220121	0.73067	0.0172145	0.78778	-0.0219137	0.731828	0.0533364	0.403948	0.0124821	0.845249	-0.0214889	0.736833	-0.0349543	0.584564
joint7	ElbowLeft	X	The variance of amplitudes	0.376214	1.00526e-09	0.280012	7.89123e-06	-0.288568	4.01395e-06	0.0903115	0.157054	0.159039	0.0123225	-0.0648026	0.310414	0.0320702	0.615952	0.254407	5.23709e-05	-0.11658	0.0673771	-0.15459	0.0150208	0.063418	0.320888	-0.00177322	0.97788	-0.0982952	0.123383	0.0325851	0.610295	0.053705	0.400704	-0.0217813	0.733387	0.00417034	0.948007
joint7	ElbowLeft	X	The standard deviation of amplitudes	0.381334	5.69886e-10	0.152071	0.0167665	-0.291558	3.15295e-06	0.0808089	0.205642	0.0881027	0.167493	-0.0700547	0.272747	0.0499394	0.434587	0.170919	0.0070935	-0.0954501	0.134673	-0.132256	0.0377878	0.00677153	0.915674	-0.00261141	0.967429	-0.111377	0.0806407	0.0794722	0.213265	0.0179779	0.778607	-0.00993248	0.876574	-0.00749183	0.906743
joint7	ElbowLeft	X	The skewness of amplitudes	-0.337344	5.47829e-08	0.142784	0.0248227	-0.00636	0.920782	-0.0254562	0.690548	0.300624	1.49056e-06	-0.120542	0.0585233	0.0232902	0.715689	0.0325893	0.610249	-0.157104	0.0134389	-0.0724975	0.256332	-0.0621871	0.330388	-0.0224756	0.725225	-0.0313113	0.624332	0.138285	0.0298	-0.0393268	0.538441	-0.0105887	0.868492	0.0193041	0.762746
joint7	ElbowLeft	X	The kurtosis of amplitudes	-0.316674	3.71313e-07	0.156274	0.0139442	-0.00318998	0.960218	-0.0257931	0.686668	0.294914	2.39634e-06	-0.117666	0.0648472	0.0290662	0.649404	0.0402043	0.529409	-0.167436	0.0083705	-0.0747906	0.241557	-0.0596677	0.350393	-0.0226156	0.723583	-0.0395405	0.536234	0.136447	0.0320653	-0.0461839	0.469962	-0.0128059	0.841287	0.0159231	0.803363
joint7	ElbowLeft	Y	Direct current component	-0.138247	0.0298455	0.0693707	0.277468	-0.0872056	0.171878	-0.142586	0.0250253	-0.186633	0.00323796	-0.123544	0.0524727	0.0392489	0.539247	-0.080677	0.206385	0.0114598	0.857783	0.0892556	0.161981	0.030709	0.631017	0.117925	0.0642573	0.0406625	0.524723	-0.00636969	0.920661	0.0456743	0.474881	0.0523607	0.412614	0.0833183	0.191867
joint7	ElbowLeft	Y	The mean of phases	0.277194	9.81138e-06	0.293995	2.58426e-06	0.00517829	0.935465	0.0299439	0.639554	-0.342362	3.36879e-08	0.127574	0.0451764	0.154627	0.0149958	-0.0657126	0.303654	-0.00362911	0.954747	0.0808369	0.205484	0.00256638	0.96799	-0.101697	0.110865	-0.0161095	0.801109	-0.118148	0.0637508	0.0400672	0.530814	-0.0636811	0.31888	0.0407947	0.523374
joint7	ElbowLeft	Y	The variance of phases	0.218319	0.000549222	0.245876	9.43242e-05	0.0301752	0.636967	0.0165989	0.795198	-0.228595	0.000291765	0.129777	0.0415612	0.109571	0.0857073	-0.0624175	0.328596	0.00293007	0.963457	0.0981819	0.123818	0.0159287	0.803295	-0.141538	0.0261236	-0.0467727	0.464313	-0.122919	0.0536885	0.0546592	0.392375	0.00794082	0.901182	0.0595363	0.351457
joint7	ElbowLeft	Y	The standard deviation of phases	0.184679	0.00358166	0.246624	8.96513e-05	0.0335187	0.600095	0.00993291	0.876569	-0.223602	0.000398154	0.124037	0.0515303	0.112606	0.0773313	-0.0818575	0.199801	0.0204176	0.749504	0.0953943	0.134903	0.024103	0.706217	-0.14463	0.0229978	-0.0580319	0.363782	-0.135033	0.0339072	0.056342	0.377943	0.0153431	0.810387	0.0683421	0.284672
joint7	ElbowLeft	Y	The skewness of phases	0.050697	0.427641	0.180771	0.00436986	0.059857	0.348864	0.00300666	0.962502	-0.0759657	0.23422	0.0876209	0.169837	0.120981	0.0576038	-0.0412831	0.518409	0.0192952	0.762852	0.0943977	0.139045	0.0326465	0.609622	-0.119314	0.0611592	-0.0936171	0.142357	-0.108862	0.0877662	0.0443384	0.487908	0.0602506	0.345698	0.0666929	0.296482
joint7	ElbowLeft	Y	The kurtosis of phases	0.0679243	0.287634	0.202688	0.00136174	0.0621849	0.330406	0.0143435	0.822528	-0.0621716	0.330509	0.0651391	0.307903	0.136281	0.0322772	-0.0272128	0.670406	0.000677233	0.991551	0.0831347	0.192851	0.0166511	0.794569	-0.0889286	0.163531	-0.088478	0.165684	-0.0915622	0.151364	0.0347279	0.587001	0.0487644	0.445487	0.0480007	0.452655
joint7	ElbowLeft	Y	The mean of amplitudes	0.51088	7.99513e-18	0.169084	0.0077429	-0.0785218	0.218807	-0.0211777	0.740506	-0.235195	0.000191412	0.0490853	0.442495	-0.161491	0.0110265	0.112806	0.0768036	-0.0556843	0.383544	-0.121307	0.0569299	0.178197	0.00497107	-0.0220975	0.729666	0.0628778	0.325035	-0.0469577	0.462547	0.0366961	0.565973	0.0391042	0.540745	0.0271222	0.671438
joint7	ElbowLeft	Y	The variance of amplitudes	0.331292	9.73624e-08	0.159353	0.0121493	-0.115749	0.0693683	-0.0799683	0.210412	-0.018735	0.76954	0.00201696	0.97484	-0.236456	0.00017636	0.270735	1.6019e-05	-0.039915	0.532378	-0.229915	0.000268425	0.280413	7.64916e-06	-0.00986743	0.877376	0.0161955	0.800069	-0.0294207	0.645418	0.0371388	0.561293	0.0295137	0.644374	0.0105696	0.868726
joint7	ElbowLeft	Y	The standard deviation of amplitudes	0.374421	1.22344e-09	-0.00864833	0.892428	-0.0410413	0.520864	-0.0447002	0.484361	-0.0570945	0.371596	0.0178311	0.780368	-0.256285	4.5879e-05	0.16393	0.00985794	-0.0683244	0.284797	-0.142898	0.0247063	0.205683	0.00115003	-0.0312242	0.625297	0.0174863	0.78451	-0.0364216	0.568884	0.0255489	0.689479	0.0375089	0.557396	0.0272861	0.669569
joint7	ElbowLeft	Y	The skewness of amplitudes	-0.213382	0.000736776	-0.397652	8.73353e-11	0.0804136	0.207875	0.0226495	0.723185	0.218748	0.000535228	-0.0314139	0.623196	-0.306679	8.90911e-07	-0.00148875	0.981428	-0.143675	0.0239268	0.0772681	0.226274	0.0537978	0.399889	0.0118324	0.85321	-0.0604092	0.344428	-0.0060229	0.924968	0.0962111	0.131578	-0.0790713	0.21559	0.0255904	0.689002
joint7	ElbowLeft	Y	The kurtosis of amplitudes	-0.180496	0.00443089	-0.382353	5.08441e-10	0.0933333	0.143576	0.0262924	0.680931	0.194411	0.00214598	-0.0481006	0.451714	-0.305103	1.01976e-06	0.00358047	0.955353	-0.152929	0.016153	0.0700142	0.273025	0.050469	0.429725	0.035678	0.576805	-0.0614541	0.336131	-0.010362	0.871282	0.0964212	0.130734	-0.0879891	0.168043	0.023423	0.714138
joint7	ElbowLeft	Z	Direct current component	0.341445	3.68448e-08	0.133972	0.035348	-0.317922	3.32148e-07	-0.0114611	0.857767	0.173494	0.00626465	-0.0752592	0.238612	0.170179	0.00734947	-0.059274	0.353587	-0.0683221	0.284813	-0.0571031	0.371524	0.0228158	0.721237	0.00955334	0.88125	-0.052008	0.415774	-0.0659671	0.301782	0.0115576	0.856582	0.106046	0.0963353	0.0119685	0.851542
joint7	ElbowLeft	Z	The mean of phases	0.2666	2.17827e-05	-0.154903	0.0148152	-0.103882	0.103363	0.117136	0.0660737	0.239984	0.000139921	0.0119327	0.851981	-0.208813	0.000961449	0.020216	0.751897	-0.0510816	0.42414	0.050814	0.426574	-0.0669931	0.294309	0.0100519	0.875103	0.0169323	0.791179	-0.00492274	0.938643	-0.0228196	0.721192	0.0227175	0.722389	-0.0198685	0.756025
joint7	ElbowLeft	Z	The variance of phases	0.111406	0.0805604	-0.159551	0.0120413	-0.109753	0.0851848	0.138201	0.0299001	0.230719	0.000255083	0.0286266	0.654361	-0.204634	0.00122046	-0.000550759	0.993129	-0.0579045	0.364838	0.0674175	0.291254	-0.0346981	0.587323	-0.00298912	0.962721	0.0177335	0.781541	-0.000121524	0.998484	-0.035473	0.578999	0.0204664	0.748925	0.00846537	0.894691
joint7	ElbowLeft	Z	The standard deviation of phases	0.110063	0.0843029	-0.17677	0.00533552	-0.108702	0.0882373	0.154115	0.0153372	0.24861	7.82874e-05	0.0157395	0.805585	-0.212622	0.000770432	0.00687043	0.914447	-0.0557261	0.383187	0.0663951	0.298649	-0.0424186	0.50696	-0.0121126	0.849775	-0.00893179	0.888925	-0.009729	0.879083	-0.0599777	0.347891	0.0217251	0.734049	0.0123072	0.84739
joint7	ElbowLeft	Z	The skewness of phases	-0.0859693	0.178059	-0.0882436	0.166812	-0.075815	0.235152	0.106851	0.093821	0.191752	0.00247427	0.0160181	0.802213	-0.135682	0.033051	0.00827952	0.89699	-0.0433635	0.497536	0.0499325	0.434651	0.0102785	0.87231	-0.0113324	0.859348	-0.0165965	0.795227	0.0160257	0.802122	-0.053528	0.40226	0.00466825	0.94181	0.0526199	0.410302
joint7	ElbowLeft	Z	The kurtosis of phases	-0.0779407	0.222246	-0.033569	0.599549	-0.0588777	0.35682	0.0822848	0.197456	0.165296	0.00925268	0.00527722	0.934235	-0.101734	0.110734	0.00191374	0.976127	-0.0386984	0.544957	0.0347639	0.586613	0.0140755	0.825791	0.000813314	0.989853	-0.0037253	0.953549	0.0299426	0.639568	-0.0309682	0.628137	-0.00510333	0.936397	0.0452126	0.479362
joint7	ElbowLeft	Z	The mean of amplitudes	0.581537	9.53164e-24	-0.465999	1.01783e-14	-0.18277	0.00394898	0.126294	0.0473955	0.011342	0.85923	-0.00789936	0.901695	-0.0477484	0.455037	-0.050366	0.430668	0.00489795	0.938952	0.0276177	0.665794	-0.0513639	0.42158	-0.00166443	0.979237	0.0682271	0.285485	0.00751813	0.906417	0.0212567	0.739574	0.0208155	0.744789	-0.0108121	0.865742
joint7	ElbowLeft	Z	The variance of amplitudes	0.0952016	0.135696	-0.32135	2.43851e-07	-0.127461	0.0453691	0.112947	0.0764336	-0.0849496	0.183281	0.105055	0.0995067	0.0926572	0.146512	-0.0900612	0.158212	0.0565106	0.376515	-0.0180598	0.777625	0.0837695	0.189463	-0.122569	0.0543781	0.0580496	0.363635	0.0274415	0.667799	0.0337687	0.597378	0.00887231	0.88966	0.030072	0.638121
joint7	ElbowLeft	Z	The standard deviation of amplitudes	0.0909644	0.154064	-0.405778	3.30086e-11	-0.114918	0.0714041	0.118424	0.0631299	-0.0826113	0.195678	0.126507	0.0470202	0.0502459	0.431769	-0.0756847	0.23596	0.0416649	0.514545	-0.011172	0.861318	0.0619119	0.332537	-0.116866	0.0667039	0.0547425	0.391652	0.0123051	0.847417	0.00517285	0.935533	0.013156	0.837008	0.0334931	0.600374
joint7	ElbowLeft	Z	The skewness of amplitudes	-0.56217	5.55888e-22	-0.0151263	0.813017	0.227225	0.000317958	0.0896947	0.159918	-0.000149392	0.998136	0.260406	3.41963e-05	-0.0117891	0.853741	0.0420266	0.510898	-0.0134058	0.833957	-0.0253413	0.691875	0.0227929	0.721505	-0.0983515	0.123167	-0.0428683	0.502463	0.0105421	0.869064	-0.0385735	0.546257	-0.0199587	0.754952	0.0672296	0.292603
joint7	ElbowLeft	Z	The kurtosis of amplitudes	-0.547161	1.08636e-20	-0.00915014	0.886228	0.246944	8.7723e-05	0.0696592	0.27547	-0.00411356	0.948714	0.25436	5.25417e-05	-0.00601155	0.925109	0.0566888	0.375009	-0.0166042	0.795134	-0.0289623	0.650575	0.0306879	0.631252	-0.0838179	0.189206	-0.0444415	0.486896	0.0189565	0.766894	-0.0452726	0.478779	-0.0262417	0.681513	0.069243	0.278356
joint8	ElbowRight	X	Direct current component	-0.396858	9.59193e-11	-0.35133	1.38258e-08	0.0782486	0.220419	-0.365244	3.28204e-09	-0.216188	0.000623983	0.0167765	0.793056	0.0505797	0.428713	-0.20371	0.00128579	0.0928198	0.145802	0.0697485	0.274853	0.0339363	0.595559	0.00477263	0.940511	-0.0133006	0.835242	-0.0242543	0.704459	0.0333352	0.602094	-0.00474001	0.940917	0.00726844	0.909512
joint8	ElbowRight	X	The mean of phases	0.196961	0.00186896	-0.0509434	0.425396	-0.0609594	0.340043	0.168991	0.0077772	-0.0942125	0.139826	-0.084673	0.184716	0.056018	0.380696	0.0221011	0.729624	0.0851374	0.18231	0.0827601	0.194871	0.0607011	0.342097	-0.0337425	0.597662	0.029782	0.641366	0.0064057	0.920214	-0.0943625	0.139193	-0.131504	0.0389006	-0.0171156	0.78897
joint8	ElbowRight	X	The variance of phases	0.103893	0.103327	-0.0263393	0.680393	-0.108684	0.0882896	0.175023	0.00581434	-0.0113975	0.858548	-0.0646161	0.311812	0.0281234	0.660054	-0.0340846	0.593951	0.0115392	0.856809	0.110189	0.0839458	0.0453194	0.478323	-0.0273544	0.668791	-0.00726458	0.90956	0.0508959	0.425828	-0.126669	0.0467361	-0.142152	0.0254752	-0.0373735	0.55882
joint8	ElbowRight	X	The standard deviation of phases	0.0909322	0.154211	-0.0552598	0.387186	-0.0980778	0.124219	0.181112	0.00429529	-0.00492611	0.938601	-0.0644406	0.313131	0.0339433	0.595483	-0.0245723	0.700768	0.0178526	0.78011	0.0996303	0.118345	0.0638458	0.317627	-0.0396643	0.534958	-0.0182086	0.775842	0.0366254	0.566722	-0.109279	0.0865523	-0.149099	0.0190524	-0.0462002	0.469805
joint8	ElbowRight	X	The skewness of phases	-0.041927	0.511901	0.0480074	0.452591	-0.0809421	0.204893	0.130744	0.0400524	0.0701213	0.27229	-0.0354603	0.579134	0.0382635	0.549488	-0.0564087	0.377377	-0.0355905	0.57774	0.0650312	0.308707	0.0507372	0.427274	0.0134669	0.833211	-0.0726533	0.255309	0.0641323	0.315456	-0.128329	0.0439098	-0.0855988	0.179943	-0.0183148	0.774569
joint8	ElbowRight	X	The kurtosis of phases	-0.0275362	0.666722	0.100781	0.114132	-0.0720005	0.259616	0.124872	0.0499676	0.0749244	0.240713	-0.049281	0.440676	0.0572777	0.370061	-0.0554652	0.385421	-0.0435868	0.495322	0.0675264	0.290473	0.031052	0.627207	0.0303399	0.63513	-0.0650056	0.308898	0.0648206	0.310279	-0.127817	0.0447661	-0.0658271	0.302811	-0.0122572	0.848003
joint8	ElbowRight	X	The mean of amplitudes	0.701685	6.15609e-38	0.204703	0.00121573	-0.090979	0.153998	-0.015757	0.805372	0.0559777	0.381039	-0.0322661	0.613797	0.0402482	0.528959	-0.0149212	0.815506	-0.103351	0.105147	0.0765054	0.230904	-0.124904	0.0499084	-0.0310173	0.627592	0.0611727	0.338353	-0.0467005	0.465004	-0.00931103	0.884241	0.0131275	0.837355	-0.0278754	0.662866
joint8	ElbowRight	X	The variance of amplitudes	0.370026	1.9703e-09	0.39603	1.05725e-10	-0.106856	0.0938041	0.130501	0.040427	0.253123	5.72971e-05	-0.0374051	0.558487	0.0705859	0.269118	0.0948924	0.136977	-0.143848	0.0237561	0.0816408	0.200998	-0.220503	0.000481268	0.00802174	0.90018	-0.0152081	0.812025	-0.061402	0.336542	-0.000117851	0.99853	0.0310888	0.626798	-0.02446	0.702071
joint8	ElbowRight	X	The standard deviation of amplitudes	0.561856	5.92405e-22	0.292734	2.8651e-06	-0.110969	0.0817639	-0.0246795	0.699527	0.183814	0.00374408	-0.00333245	0.958443	0.0429701	0.501448	0.0160527	0.801795	-0.161054	0.0112482	0.0664227	0.298448	-0.175851	0.00558286	-0.0311565	0.626047	-0.0127242	0.842286	-0.0224014	0.726096	0.00544124	0.932196	0.0261936	0.682065	-0.0494981	0.438663
joint8	ElbowRight	X	The skewness of amplitudes	-0.374546	1.20691e-09	0.0739067	0.24718	-0.00346507	0.95679	-0.148179	0.0198124	0.104486	0.101364	-0.000831396	0.989628	-0.0245252	0.701315	-0.00896211	0.88855	-0.238294	0.000156396	-0.0183151	0.774566	-0.130408	0.0405723	-0.0880112	0.167936	-0.0170118	0.79022	0.213352	0.000738112	0.088027	0.16786	-0.0375706	0.556747	-0.113242	0.0756611
joint8	ElbowRight	X	The kurtosis of amplitudes	-0.360389	5.464e-09	0.0868452	0.173663	0.0153289	0.810559	-0.173905	0.00614052	0.0869428	0.173178	-0.00694245	0.913554	-0.0112997	0.859749	0.00913137	0.886459	-0.238805	0.000151229	-0.038934	0.542509	-0.129805	0.0415171	-0.080347	0.208254	-0.0263779	0.679951	0.21275	0.000764684	0.0907994	0.154816	-0.0364719	0.56835	-0.114103	0.0734496
joint8	ElbowRight	Y	Direct current component	-0.114484	0.0724888	0.22504	0.000364316	-0.167609	0.00830256	-0.101803	0.110491	-0.0309613	0.628214	-0.0948092	0.137323	-0.0344341	0.59017	0.122077	0.0553611	-0.0437004	0.494197	0.0258719	0.685761	0.0172102	0.787831	0.103273	0.105414	-0.054105	0.397199	-0.0387195	0.544737	0.000497859	0.993789	0.0168219	0.792508	0.0464147	0.467743
joint8	ElbowRight	Y	The mean of phases	0.237369	0.000166166	-0.0961005	0.132025	-0.112863	0.0766523	0.100671	0.11453	-0.0155345	0.808067	-0.0818899	0.199623	-0.0865754	0.175008	0.112307	0.0781249	-0.0767435	0.229451	-0.0298224	0.640913	-0.0394479	0.53719	0.0492716	0.440764	0.134821	0.0341909	-0.0512086	0.422987	0.0470962	0.461226	-0.0433772	0.497399	-0.0256624	0.688173
joint8	ElbowRight	Y	The variance of phases	0.140712	0.0270182	-0.0875987	0.169946	-0.0456766	0.474859	0.114251	0.0730741	0.0335187	0.600096	-0.0876446	0.169721	-0.159982	0.0118091	0.140675	0.0270585	-0.111184	0.0811699	-0.0450273	0.481167	-0.0403934	0.527472	0.0627056	0.326365	0.113661	0.0745801	-0.0469121	0.462982	0.071337	0.264044	-0.0762836	0.232263	0.00139292	0.982623
joint8	ElbowRight	Y	The standard deviation of phases	0.139517	0.0283579	-0.103419	0.104918	-0.0399835	0.531674	0.125778	0.0483156	0.0237162	0.710719	-0.0905274	0.15606	-0.169699	0.00751945	0.144891	0.0227496	-0.104505	0.101301	-0.0579974	0.364068	-0.037624	0.556185	0.0699878	0.273206	0.0994477	0.119024	-0.0367088	0.565838	0.0702859	0.271163	-0.0724508	0.256639	0.00227296	0.971648
joint8	ElbowRight	Y	The skewness of phases	-0.0131264	0.837369	-0.0205731	0.747661	0.0524752	0.411592	0.103526	0.104556	0.0760271	0.233841	-0.0853313	0.181313	-0.111919	0.079167	0.13163	0.0387123	-0.125817	0.0482456	-0.0458699	0.47299	-0.0242991	0.703939	0.0767142	0.229629	0.0648313	0.3102	-0.0305425	0.632871	0.0713144	0.264195	-0.0800578	0.209901	0.0342812	0.591823
joint8	ElbowRight	Y	The kurtosis of phases	-0.00668263	0.916777	0.0336102	0.5991	0.0579887	0.36414	0.0899847	0.158567	0.0916081	0.151158	-0.0913587	0.152279	-0.0586987	0.358287	0.116216	0.0682427	-0.119104	0.0616194	-0.0359503	0.573899	-0.0297269	0.641983	0.079411	0.213619	0.0705243	0.269537	-0.0269447	0.673464	0.0648719	0.309896	-0.072673	0.25518	0.021889	0.732119
joint8	ElbowRight	Y	The mean of amplitudes	0.584954	4.52177e-24	0.22112	0.000463539	-0.145039	0.0226091	0.0820392	0.198802	0.0863912	0.175931	-0.00800037	0.900445	-0.146774	0.0210248	0.239102	0.000148305	-0.103316	0.105267	-0.087839	0.168773	-0.0400276	0.531221	-0.0199975	0.754492	0.0547519	0.391571	-0.112876	0.0766193	-0.011144	0.861662	0.0427838	0.503307	-0.014791	0.817087
joint8	ElbowRight	Y	The variance of amplitudes	0.307165	8.54428e-07	0.421187	4.84549e-12	-0.139099	0.0288401	0.161041	0.011255	0.255307	4.91575e-05	-0.0314837	0.622424	-0.0151129	0.813179	0.223963	0.000389408	-0.150513	0.0179334	-0.032706	0.60897	-0.129044	0.0427357	0.00374484	0.953305	-0.0376915	0.555477	-0.0809383	0.204915	0.000579038	0.992776	0.0253446	0.691836	0.000715394	0.991075
joint8	ElbowRight	Y	The standard deviation of amplitudes	0.402681	4.79753e-11	0.269326	1.77978e-05	-0.0810142	0.204489	0.115319	0.0704165	0.144912	0.0227292	-0.000739077	0.990779	-0.117857	0.064411	0.213174	0.000745853	-0.126208	0.0475489	-0.0721692	0.258498	-0.0719452	0.259983	-0.016921	0.791314	-0.0246268	0.700137	-0.111607	0.0800109	-0.00713915	0.911115	0.0329425	0.606382	-0.00730437	0.909066
joint8	ElbowRight	Y	The skewness of amplitudes	-0.399501	7.01586e-11	-0.0777661	0.223287	0.187863	0.00303715	0.0475366	0.457042	0.0411675	0.519582	0.0134363	0.833585	-0.255461	4.86268e-05	-0.0320709	0.615944	0.030146	0.637294	-0.000450128	0.994384	-0.00294009	0.963332	-0.0247894	0.698254	-0.052115	0.414814	-0.0296409	0.642947	0.0775541	0.224555	-0.0160202	0.802188	-0.0496724	0.437051
joint8	ElbowRight	Y	The kurtosis of amplitudes	-0.357066	7.70699e-09	-0.0780185	0.221783	0.19731	0.00183364	0.0473986	0.458351	0.0523081	0.413085	-0.00280953	0.964959	-0.249849	7.19016e-05	-0.0369742	0.563031	0.020155	0.75262	-0.00602443	0.924949	0.00865316	0.892369	-0.0431942	0.499217	-0.0177705	0.781097	-0.0199678	0.754844	0.0692581	0.278251	-0.0193581	0.762102	-0.0433575	0.497595
joint8	ElbowRight	Z	Direct current component	0.231467	0.000243216	0.159508	0.0120647	0.114408	0.072679	-0.0481409	0.451334	0.148798	0.0192985	-0.223404	0.000403039	0.0394429	0.537241	0.018323	0.774471	-0.0820894	0.198526	0.0274061	0.668202	0.0320872	0.615765	0.14394	0.0236653	-0.143389	0.0242111	0.0289295	0.650944	-0.0367234	0.565684	0.0657791	0.303164	0.0299941	0.638992
joint8	ElbowRight	Z	The mean of phases	0.162197	0.0106761	-0.298598	1.76613e-06	-0.243857	0.000108087	0.0205894	0.747467	0.0695311	0.276356	0.0147179	0.817975	-0.0245492	0.701037	0.109676	0.085406	0.145255	0.0224063	0.106381	0.0952822	-0.00855493	0.893583	-0.0874013	0.170914	0.0288573	0.651758	-0.0227148	0.72242	-0.0407281	0.524054	0.0282163	0.659001	-0.019598	0.759244
joint8	ElbowRight	Z	The variance of phases	0.0043825	0.945366	-0.301263	1.41252e-06	-0.271251	1.54103e-05	0.086654	0.174616	0.0492919	0.440575	-0.00571817	0.928754	-0.0170374	0.789912	0.0805792	0.206938	0.116707	0.0670784	0.0790567	0.215675	0.000836973	0.989558	-0.110791	0.0822576	0.0441822	0.489444	-0.00365513	0.954423	-0.0140133	0.826548	0.0119461	0.851815	-0.0183139	0.774579
joint8	ElbowRight	Z	The standard deviation of phases	0.0127034	0.84254	-0.323156	2.06891e-07	-0.279675	8.10067e-06	0.113306	0.0754961	0.0403815	0.527593	0.0142146	0.824098	-0.0117879	0.853756	0.0805793	0.206937	0.121784	0.0559544	0.0832231	0.192377	-0.00464922	0.942046	-0.1029	0.106682	0.0424693	0.506453	-0.00233635	0.970858	-0.0245287	0.701275	0.0167115	0.793839	-0.0280369	0.661034
joint8	ElbowRight	Z	The skewness of phases	-0.145748	0.0219493	-0.170523	0.00722935	-0.180089	0.00452251	0.145893	0.0218164	0.0133856	0.834203	-0.0176668	0.782342	0.0238432	0.709239	0.0110048	0.863373	0.0466497	0.465491	0.00176815	0.977943	0.0137848	0.829334	-0.0662422	0.299766	0.0333246	0.602209	0.0388451	0.543432	-0.0164099	0.797479	0.00582323	0.927448	-0.0308524	0.629423
joint8	ElbowRight	Z	The kurtosis of phases	-0.127262	0.0457088	-0.0927171	0.14625	-0.137399	0.0308744	0.113274	0.0755789	0.0301392	0.63737	-0.0483237	0.449616	0.0527352	0.409275	0.010515	0.869398	0.0364431	0.568656	0.000685518	0.991448	0.0195307	0.760045	-0.0472352	0.459903	0.0158222	0.804584	0.0326953	0.609087	-0.0190998	0.765184	-0.00158872	0.980181	-0.0319182	0.617627
joint8	ElbowRight	Z	The mean of amplitudes	0.41852	6.80172e-12	-0.455797	4.48986e-14	-0.413679	1.2493e-11	0.0865939	0.174916	-0.0791514	0.215124	0.0287714	0.652726	-0.0426142	0.505002	0.0564284	0.377211	-0.078681	0.217872	0.0168983	0.791587	-0.049212	0.441318	0.00759675	0.905443	0.0199297	0.755297	-0.0796533	0.21222	-0.0396458	0.535148	0.0401647	0.529814	0.0250623	0.695097
joint8	ElbowRight	Z	The variance of amplitudes	0.0518568	0.417133	-0.236159	0.000179804	-0.27921	8.39804e-06	0.166257	0.00884675	-0.11604	0.0686651	0.0269982	0.672854	0.014999	0.814561	-0.0887245	0.164503	-0.189214	0.00282966	-0.0950353	0.136384	0.0411378	0.519884	-0.00808005	0.899458	0.00709162	0.911704	-0.0291466	0.6485	-0.010764	0.866335	-0.0378928	0.553366	0.0748982	0.240878
joint8	ElbowRight	Z	The standard deviation of amplitudes	0.0521776	0.414253	-0.312929	5.17346e-07	-0.283807	5.86288e-06	0.171471	0.00690818	-0.130305	0.0407319	0.0640413	0.316145	-0.00633284	0.921119	-0.051903	0.416718	-0.180346	0.00446439	-0.0831412	0.192816	-0.00617637	0.923062	0.00605684	0.924546	0.0216199	0.735288	-0.0462067	0.469742	-0.0089596	0.888581	0.0130366	0.838466	0.0656883	0.303834
joint8	ElbowRight	Z	The skewness of amplitudes	-0.535112	1.06297e-19	-0.00465483	0.941977	0.0807658	0.205885	0.207532	0.00103488	-0.0634883	0.32035	0.0453525	0.478002	0.0391616	0.54015	-0.0158256	0.804543	-0.107544	0.0916986	-0.092846	0.145688	-0.0151228	0.813059	0.00194861	0.975693	-0.0201507	0.752671	0.0631845	0.322676	0.0980974	0.124144	0.0290593	0.649482	0.0352864	0.580998
joint8	ElbowRight	Z	The kurtosis of amplitudes	-0.527064	4.63906e-19	5.21238e-05	0.99935	0.0974462	0.126673	0.191018	0.00257271	-0.0629888	0.32418	0.0493132	0.440378	0.0412561	0.518683	-0.0158391	0.804379	-0.120379	0.058868	-0.0876624	0.169634	-0.013539	0.832331	0.0151673	0.812519	-0.0295923	0.643492	0.0594869	0.351857	0.0757842	0.235343	0.0287133	0.653382	0.0291644	0.648299
joint24	FootLeft	X	Direct current component	0.0245528	0.700994	-0.294843	2.41047e-06	-0.080511	0.207324	-0.462078	1.81108e-14	0.228241	0.000298324	0.0107738	0.866214	0.0536945	0.400796	0.0165494	0.795796	-0.119694	0.0603322	0.0359765	0.57362	0.0925958	0.146781	-0.103149	0.105834	0.052057	0.415334	-0.00102752	0.987181	0.118203	0.0636263	-0.0233024	0.715547	0.0219929	0.730896
joint24	FootLeft	X	The mean of phases	0.125085	0.0495755	-0.283547	5.98455e-06	-0.110431	0.0832646	0.273055	1.34519e-05	0.0515335	0.420046	-0.1679	0.00818935	0.00922708	0.885277	-0.0380283	0.551947	0.229967	0.000267547	-0.31808	3.27463e-07	-0.251586	6.3765e-05	0.0349251	0.584878	0.051355	0.421661	0.0669156	0.294868	0.0523073	0.413092	-0.150662	0.0178185	0.039859	0.532954
joint24	FootLeft	X	The variance of phases	0.0054324	0.932306	-0.165301	0.00925046	-0.186559	0.0032503	0.200809	0.00151218	0.10778	0.0909843	-0.117202	0.0659201	0.0445554	0.48578	-0.0700717	0.27263	0.200431	0.0015443	-0.297134	1.99486e-06	-0.256058	4.66221e-05	0.0433809	0.497363	0.0553264	0.386613	0.056284	0.378435	0.0473741	0.458583	-0.0713321	0.264076	0.0432807	0.498358
joint24	FootLeft	X	The standard deviation of phases	0.00794225	0.901164	-0.174886	0.00585363	-0.177393	0.00517372	0.222483	0.00042649	0.111544	0.0801843	-0.104269	0.102079	0.0458798	0.472894	-0.0564188	0.377292	0.203179	0.00132473	-0.306085	9.37544e-07	-0.272466	1.40633e-05	0.0353256	0.580577	0.0551338	0.388271	0.0501706	0.432461	0.0531721	0.4054	-0.0672813	0.292232	0.0467422	0.464605
joint24	FootLeft	X	The skewness of phases	-0.11271	0.0770562	0.0243621	0.703207	-0.135752	0.0329594	0.0988184	0.121389	0.131358	0.0391201	-0.0741158	0.245841	0.0834111	0.19137	-0.0832268	0.192356	0.119882	0.0599285	-0.226484	0.000333027	-0.190601	0.0026301	0.0518079	0.417573	0.0291402	0.648571	0.0229786	0.719331	0.0301687	0.63704	-0.0051754	0.935501	0.0254353	0.69079
joint24	FootLeft	X	The kurtosis of phases	-0.0926216	0.146668	0.0658659	0.302525	-0.108528	0.0887489	0.0905768	0.155834	0.131167	0.0394076	-0.0972289	0.127525	0.0943165	0.139387	-0.0782861	0.220197	0.103779	0.103709	-0.197007	0.00186425	-0.161572	0.0109855	0.0650021	0.308924	0.0194958	0.760461	0.0302693	0.635917	0.0176507	0.782535	-0.00930507	0.884314	0.015038	0.814088
joint24	FootLeft	X	The mean of amplitudes	0.586739	3.05178e-24	-0.396441	1.00743e-10	0.191913	0.00245317	-0.0559505	0.381271	0.197843	0.00178098	-0.181537	0.00420399	0.093215	0.144087	-0.133653	0.0357912	0.082669	0.195364	0.0763935	0.231588	-0.0918321	0.150157	-0.0277273	0.664549	-0.0620359	0.331568	-0.00355156	0.955713	0.0163798	0.797843	-0.0866294	0.174738	-0.0075621	0.905872
joint24	FootLeft	X	The variance of amplitudes	0.415979	9.3707e-12	-0.176931	0.00529345	0.321809	2.33905e-07	-0.218828	0.000532653	0.206724	0.0010838	-0.0565757	0.375965	0.0970844	0.128095	-0.193802	0.00221743	-0.0128789	0.840394	0.252064	6.16836e-05	0.0652788	0.306865	-0.022916	0.720064	-0.094823	0.137265	-0.0745702	0.24295	0.0213072	0.738977	0.00899308	0.888168	-0.0335227	0.600053
joint24	FootLeft	X	The standard deviation of amplitudes	0.418088	7.18382e-12	-0.202321	0.00139003	0.262079	3.03084e-05	-0.262827	2.87086e-05	0.196319	0.00193547	-0.0263478	0.680296	0.130577	0.0403108	-0.171826	0.006791	-0.0188248	0.768467	0.2387	0.000152272	0.0520751	0.415172	-0.0351148	0.582839	-0.0745277	0.24322	-0.0554046	0.385941	0.0144173	0.821631	0.025505	0.689986	-0.0134893	0.832938
joint24	FootLeft	X	The skewness of amplitudes	-0.499586	5.33964e-17	0.310239	6.54739e-07	-0.0423867	0.50728	-0.166751	0.00864403	-0.0411394	0.519868	0.278698	8.73738e-06	0.0453561	0.477967	-0.0618744	0.33283	0.0156014	0.807256	0.120129	0.0593977	0.0956361	0.133912	0.0891786	0.162345	0.0816264	0.201078	-0.0864476	0.175649	0.0442196	0.489076	0.0793408	0.214025	0.0220733	0.729951
joint24	FootLeft	X	The kurtosis of amplitudes	-0.509775	9.65768e-18	0.295974	2.19588e-06	-0.0238304	0.709389	-0.172735	0.00649957	-0.0589554	0.356184	0.275385	1.12693e-05	0.0421508	0.509648	-0.0693084	0.277901	0.0280098	0.661341	0.106271	0.0956292	0.104977	0.0997583	0.0940008	0.140722	0.0730902	0.252455	-0.0864593	0.17559	0.0535031	0.402479	0.0470998	0.461192	0.0261995	0.681998
joint24	FootLeft	Y	Direct current component	-0.331295	9.73386e-08	-0.058517	0.359779	-0.113701	0.074476	-0.17288	0.00645402	0.00182597	0.977222	0.00958658	0.88084	0.151143	0.0174528	0.00128989	0.983908	0.0641805	0.315092	0.0152069	0.812038	0.0337032	0.598089	0.062876	0.325049	0.0100292	0.875382	-0.0122133	0.848541	-0.0230376	0.718641	-0.0320552	0.616117	-0.0598815	0.348666
joint24	FootLeft	Y	The mean of phases	-0.0608824	0.340655	0.159811	0.0119011	0.0497083	0.43672	0.0248029	0.698098	-0.0320476	0.616201	0.272763	1.37515e-05	0.0486644	0.446423	0.00964454	0.880125	0.219874	0.000499999	-0.0115708	0.85642	-0.0155738	0.807591	0.00235879	0.970578	-0.115213	0.070676	0.0462756	0.46908	0.0387276	0.544653	0.0309578	0.628252	-0.0200609	0.753738
joint24	FootLeft	Y	The variance of phases	0.0855043	0.180426	0.228679	0.000290223	0.252736	5.88618e-05	0.0164806	0.796626	0.0158031	0.804814	0.198935	0.00167732	0.00258294	0.967784	0.00582794	0.92739	0.117928	0.0642487	-0.00526893	0.934338	-0.0157635	0.805294	0.0128481	0.840771	-0.100755	0.114227	0.0240361	0.706994	0.0452041	0.479445	0.0161969	0.800052	0.0338299	0.596713
joint24	FootLeft	Y	The standard deviation of phases	0.0418529	0.512648	0.202107	0.0014067	0.261362	3.19205e-05	0.0126762	0.842873	-0.00995431	0.876305	0.205981	0.00113071	-0.0157489	0.805471	0.00802566	0.900131	0.135221	0.0336581	-0.0071064	0.911521	0.000275942	0.996557	-0.00691572	0.913885	-0.0995804	0.11853	0.0294662	0.644907	0.0573039	0.369842	0.0226192	0.723541	0.0353524	0.58029
joint24	FootLeft	Y	The skewness of phases	0.045952	0.472197	0.246482	9.05221e-05	0.251961	6.21237e-05	0.0267236	0.675992	0.0644738	0.312881	0.0983853	0.123038	0.0458503	0.473179	0.0162996	0.798812	0.0261827	0.68219	0.00474039	0.940912	0.00785591	0.902233	0.0252257	0.693209	-0.0676054	0.289908	0.0159622	0.80289	0.0429714	0.501435	0.0247777	0.698389	0.0487561	0.445565
joint24	FootLeft	Y	The kurtosis of phases	0.0544317	0.394351	0.271636	1.49715e-05	0.218232	0.000552108	0.0436803	0.494396	0.0874586	0.170633	0.076944	0.228233	0.0873672	0.171081	0.0315736	0.621431	0.014825	0.816674	0.00410995	0.948759	-0.0127007	0.842573	0.0493579	0.439963	-0.0660944	0.300847	0.0181292	0.776793	0.030766	0.630384	0.0251672	0.693884	0.0350557	0.583474
joint24	FootLeft	Y	The mean of amplitudes	0.429931	1.56052e-12	-0.0978524	0.12509	0.571911	7.43627e-23	-0.127938	0.0445619	0.0760146	0.233918	0.0663635	0.298879	-0.122202	0.0551098	-0.017057	0.789676	0.0269046	0.673923	0.0835135	0.190824	-0.0825958	0.195762	-0.00424927	0.947024	-0.0405215	0.526162	-0.0195732	0.759539	0.00099542	0.987582	-0.0412555	0.51869	0.046433	0.467568
joint24	FootLeft	Y	The variance of amplitudes	0.356417	8.23873e-09	-0.133644	0.0358038	0.552977	3.4947e-21	-0.164319	0.00968208	0.21156	0.000819845	0.161765	0.0108892	-0.169847	0.00746652	-0.0665325	0.297648	0.00540036	0.932704	-0.0463266	0.468589	0.0314989	0.622256	-0.0885515	0.165331	0.0136752	0.83067	-0.0364258	0.568839	0.0198092	0.75673	-0.0615692	0.335226	0.0285026	0.655762
joint24	FootLeft	Y	The standard deviation of amplitudes	0.402931	4.65602e-11	-0.152304	0.0165982	0.658604	4.2532e-32	-0.155634	0.014345	0.134105	0.035165	0.010991	0.863543	-0.165512	0.00915979	0.0157472	0.805491	-0.0384556	0.547485	0.0237627	0.710177	-0.000490242	0.993884	-0.0485445	0.447545	0.0255592	0.689361	-0.0234622	0.71368	0.0017348	0.978359	-0.0401118	0.530357	0.0447039	0.484326
joint24	FootLeft	Y	The skewness of amplitudes	0.0693603	0.27754	-0.0350028	0.584042	0.403421	4.38943e-11	-0.132051	0.0380876	0.021914	0.731824	-0.11303	0.0762153	-0.215192	0.000662057	0.166322	0.00881986	-0.187	0.00317678	0.0188965	0.767611	0.0330924	0.604744	-0.0950031	0.136517	0.0553962	0.386013	0.0877964	0.168981	0.0350683	0.583339	0.0252325	0.693129	0.0502614	0.431627
joint24	FootLeft	Y	The kurtosis of amplitudes	0.0706652	0.268579	-0.00948847	0.882051	0.406273	3.10839e-11	-0.107235	0.0926389	-0.00787105	0.902046	-0.0831733	0.192644	-0.223846	0.000392217	0.16746	0.00836071	-0.178507	0.00489505	0.0203129	0.750746	0.0416513	0.514682	-0.0870582	0.172606	0.04096	0.521691	0.0939097	0.141109	0.0238802	0.708809	0.0207803	0.745206	0.0450441	0.481003
joint24	FootLeft	Z	Direct current component	0.108023	0.0902528	-0.020346	0.750354	0.618507	1.82584e-27	0.00695213	0.913434	-0.062393	0.328787	-0.335833	6.33197e-08	-0.207608	0.00103035	0.0982713	0.123475	-0.117756	0.0646421	0.0110919	0.862302	0.0300649	0.638201	0.0317389	0.619605	0.00204736	0.974461	-0.017816	0.78055	-0.0327659	0.608314	-0.139916	0.0279047	-0.00111326	0.986111
joint24	FootLeft	Z	The mean of phases	0.169736	0.00750617	-0.0728621	0.253942	0.458048	3.24991e-14	0.0221085	0.729537	-0.174939	0.00583823	-0.103397	0.104992	-0.14711	0.0207287	-0.0285944	0.654725	0.218903	0.000530246	0.0611312	0.338681	-0.0666567	0.296745	0.0914772	0.151746	0.00917183	0.88596	-0.0133272	0.834917	0.0126039	0.843759	0.0227441	0.722077	-0.0113473	0.859165
joint24	FootLeft	Z	The variance of phases	0.104763	0.100454	-0.0530701	0.406303	0.395775	1.08945e-10	0.00966555	0.879866	-0.219639	0.00050718	-0.201351	0.00146735	-0.124112	0.0513882	-0.0706463	0.268707	0.225202	0.000360673	0.0530788	0.406226	-0.07978	0.211492	0.092998	0.145027	0.0170478	0.789786	0.0224944	0.725004	0.0252416	0.693025	0.0333246	0.60221	-0.00795328	0.901027
joint24	FootLeft	Z	The standard deviation of phases	0.0880957	0.167527	-0.0408406	0.522906	0.384828	3.84684e-10	0.0246321	0.700076	-0.223872	0.000391596	-0.185584	0.00341853	-0.148638	0.0194296	-0.0625189	0.32781	0.240848	0.000132137	0.0544944	0.393805	-0.0920463	0.149204	0.077225	0.226534	0.0162376	0.79956	0.034177	0.592951	0.0331001	0.604659	0.0431629	0.499529	0.000471785	0.994114
joint24	FootLeft	Z	The skewness of phases	0.0349078	0.585064	-0.0420078	0.511088	0.338871	4.72939e-08	-0.00139984	0.982537	-0.213886	0.000715231	-0.219184	0.000521305	-0.0908452	0.154607	-0.101964	0.109923	0.22156	0.000451288	0.035996	0.573412	-0.0479888	0.452767	0.0975447	0.126288	0.031071	0.626996	0.0472434	0.459825	0.0395047	0.536604	0.0285476	0.655254	-0.0120809	0.850164
joint24	FootLeft	Z	The kurtosis of phases	0.015343	0.810389	-0.0430562	0.500591	0.3277	1.36181e-07	-0.00733465	0.908691	-0.193445	0.00226041	-0.223122	0.000410101	-0.0472179	0.460067	-0.110798	0.0822379	0.213551	0.000729485	0.023899	0.70859	-0.0185044	0.772299	0.110204	0.0839031	0.033008	0.605666	0.0512223	0.422863	0.038324	0.548857	0.0154954	0.808541	-0.0217882	0.733305
joint24	FootLeft	Z	The mean of amplitudes	0.48441	6.14909e-16	-0.270415	1.64076e-05	0.329366	1.16615e-07	-0.245327	9.78917e-05	-0.178431	0.00491353	-0.150256	0.0181318	0.0622875	0.329607	0.00716776	0.91076	0.0946647	0.137926	0.0815557	0.20147	-0.144258	0.0233557	0.118189	0.0636586	-0.0309696	0.628121	0.00337449	0.957919	-0.0112608	0.860227	-0.0587666	0.35773	0.0271635	0.670967
joint24	FootLeft	Z	The variance of amplitudes	-0.128597	0.0434672	-0.281766	6.8823e-06	-0.202696	0.00136113	-0.255491	4.85259e-05	-0.160215	0.0116849	-0.092302	0.148073	0.138926	0.0290424	0.0799901	0.210288	0.0328589	0.607296	-0.00972264	0.879162	-0.143027	0.0245755	0.0296524	0.642819	-0.0455673	0.475917	0.0611812	0.338286	-0.00861472	0.892844	0.0288375	0.651981	0.0242864	0.704087
joint24	FootLeft	Z	The standard deviation of amplitudes	-0.149755	0.0185255	-0.281016	7.29802e-06	-0.223322	0.000405098	-0.249146	7.54642e-05	-0.161873	0.0108358	-0.0984096	0.122945	0.148909	0.0192074	0.0951902	0.135743	0.0348063	0.586157	-0.0125781	0.844074	-0.139425	0.0284639	0.0290208	0.649915	-0.0387081	0.544856	0.0662558	0.299666	-0.00642674	0.919953	0.0468648	0.463433	0.0324186	0.612122
joint24	FootLeft	Z	The skewness of amplitudes	-0.634932	2.79344e-29	0.0426343	0.504801	-0.359874	5.76459e-09	0.11554	0.0698762	0.0124994	0.845037	-0.0238733	0.708889	0.00331652	0.958641	0.0813708	0.202497	0.0269099	0.673863	-0.021094	0.741495	0.0265769	0.677671	-0.0520397	0.415489	-0.0118789	0.852639	0.0047898	0.940297	0.00640994	0.920162	0.136867	0.0315359	-0.00800404	0.900399
joint24	FootLeft	Z	The kurtosis of amplitudes	-0.626384	2.53687e-28	0.0536753	0.400964	-0.318859	3.05362e-07	0.0899045	0.158939	0.0176105	0.783018	-0.0303516	0.634999	-0.00149032	0.981408	0.0595001	0.351751	0.0262853	0.681013	-0.0250636	0.695082	0.0320946	0.615683	-0.0463636	0.468234	-0.0155209	0.808232	0.00245514	0.969377	-0.00322925	0.959728	0.118784	0.0623252	-0.00754607	0.906071
joint25	FootRight	X	Direct current component	-0.0455026	0.476545	0.151422	0.0172444	0.176823	0.00532164	0.0636472	0.319138	-0.184651	0.00358679	0.0242501	0.704507	-0.250794	6.736e-05	-0.00234802	0.970712	-0.148328	0.0196873	-0.0559645	0.381151	-0.0453434	0.47809	-0.00647396	0.919367	-0.0309668	0.628153	-0.113992	0.0737316	-0.0185578	0.77166	-0.0521644	0.414371	-0.021467	0.737091
joint25	FootRight	X	The mean of phases	0.336528	5.92446e-08	-0.355982	8.61405e-09	-0.172114	0.0066974	0.13185	0.0383854	-0.172578	0.0065491	-0.047517	0.457227	0.0027366	0.965868	-0.145178	0.0224789	0.0215322	0.736322	-0.00977238	0.878548	0.00384313	0.952081	0.0494377	0.439223	0.104012	0.10293	0.0152072	0.812036	-0.00350597	0.956281	-0.0479968	0.452692	-0.0800519	0.209934
joint25	FootRight	X	The variance of phases	0.199845	0.00159522	-0.322314	2.23393e-07	-0.248583	7.84309e-05	0.114768	0.0717783	-0.114736	0.0718577	-0.0426547	0.504597	0.0170266	0.790043	-0.136536	0.0319525	0.0191986	0.764004	-0.0112328	0.860571	-0.0115149	0.857107	0.0696142	0.275781	0.0740848	0.24604	0.00962818	0.880327	-0.0541401	0.396892	-0.0695851	0.275982	-0.0285227	0.655535
joint25	FootRight	X	The standard deviation of phases	0.186826	0.00320555	-0.327618	1.37217e-07	-0.233384	0.000215133	0.129474	0.0420434	-0.103878	0.103376	-0.0297293	0.641956	0.0175169	0.784143	-0.139015	0.0289379	-0.00811568	0.899017	-0.0107023	0.867093	-0.00343164	0.957207	0.0696939	0.27523	0.0500313	0.433741	0.00893306	0.888909	-0.0620616	0.331368	-0.0776801	0.2238	-0.0401905	0.52955
joint25	FootRight	X	The skewness of phases	-0.00219466	0.972624	-0.136527	0.0319637	-0.197331	0.00183158	0.109975	0.0845526	0.00258795	0.967721	-0.0170755	0.789453	0.0214492	0.737302	-0.08087	0.205298	-0.0162218	0.799751	-0.0214926	0.736789	-0.0167533	0.793335	0.0858749	0.178538	-0.0090573	0.887374	-0.00388902	0.95151	-0.0685033	0.283535	-0.0833881	0.191493	0.0390755	0.541042
joint25	FootRight	X	The kurtosis of phases	0.0190372	0.76593	-0.0816133	0.201151	-0.172649	0.00652639	0.0998277	0.117614	0.000479407	0.994019	-0.0325685	0.610477	0.0367979	0.564895	-0.0719301	0.260083	-0.0132551	0.835797	-0.0254197	0.690969	-0.0238559	0.709092	0.091846	0.150096	0.00824071	0.89747	0.00574735	0.928391	-0.0526081	0.410407	-0.0661945	0.300115	0.0353077	0.580769
joint25	FootRight	X	The mean of amplitudes	0.591803	9.87516e-25	-0.454258	5.59282e-14	0.0034409	0.957091	-0.0427542	0.503603	0.118565	0.0628128	-0.141507	0.0261565	0.108455	0.0889668	-0.132711	0.0371264	-0.057815	0.365581	0.0492915	0.440579	0.0586837	0.35841	0.0332354	0.603182	0.0729816	0.253162	0.100057	0.116769	0.0414796	0.516419	0.00303113	0.962197	-0.00397408	0.950451
joint25	FootRight	X	The variance of amplitudes	0.363273	4.04094e-09	-0.314857	4.36413e-07	0.11626	0.0681378	-0.180115	0.00451665	0.304097	1.11115e-06	-0.119865	0.0599636	0.124784	0.0501309	-0.0932757	0.143825	-0.109688	0.085371	0.0693222	0.277805	0.0611691	0.338381	0.0533699	0.403653	-0.00866946	0.892167	0.115256	0.0705701	-0.00792549	0.901372	0.103044	0.106192	0.0579378	0.364561
joint25	FootRight	X	The standard deviation of amplitudes	0.375208	1.1226e-09	-0.339342	4.51889e-08	0.0560809	0.380161	-0.199518	0.00162424	0.324841	1.77305e-07	-0.0861038	0.177379	0.16414	0.00976241	-0.0783793	0.219646	-0.122371	0.0547726	0.0918109	0.150252	0.0578565	0.365236	0.0524333	0.411967	-0.0247396	0.69883	0.110521	0.0830107	0.000584743	0.992705	0.0693671	0.277493	0.0748409	0.24124
joint25	FootRight	X	The skewness of amplitudes	-0.477016	1.93688e-15	0.348181	1.89616e-08	-0.113685	0.0745168	-0.264676	2.5089e-05	0.138528	0.0295103	0.244692	0.000102181	0.150203	0.0181736	0.0828961	0.194135	-0.0684081	0.284206	0.124689	0.0503063	-0.0777778	0.223216	0.00914275	0.886319	-0.0561599	0.379489	0.0417904	0.513278	-0.0381484	0.550691	0.0226088	0.723663	0.0519154	0.416606
joint25	FootRight	X	The kurtosis of amplitudes	-0.475107	2.59313e-15	0.358698	6.5118e-09	-0.0759091	0.23457	-0.267792	1.9946e-05	0.128129	0.0442418	0.242537	0.00011808	0.139841	0.0279898	0.0868391	0.173693	-0.0748712	0.241048	0.129498	0.0420046	-0.0696277	0.275688	0.0109322	0.864266	-0.0565174	0.376458	0.0383191	0.548908	-0.020883	0.743991	0.022406	0.726042	0.0394089	0.537593
joint25	FootRight	Y	Direct current component	-0.340002	4.23916e-08	-0.0631133	0.323223	-0.0832218	0.192383	-0.185282	0.00347226	0.0117462	0.854268	-0.0189227	0.767297	0.14369	0.0239122	0.00554585	0.930895	0.0507078	0.427543	0.0426263	0.504881	0.0234198	0.714175	0.065252	0.307064	-0.00553843	0.930988	-0.0335603	0.599643	-0.0225469	0.724389	-0.06177	0.333649	-0.0521948	0.414099
joint25	FootRight	Y	The mean of phases	-0.100838	0.113928	0.00858983	0.893152	-0.215874	0.000635757	0.0371832	0.560825	0.119947	0.059789	0.187361	0.00311759	0.147662	0.0202512	-0.211652	0.000815427	0.0363864	0.569257	-0.216092	0.000627557	0.0490778	0.442566	0.195608	0.0020116	0.175822	0.00559072	-0.0925673	0.146906	0.0505028	0.429415	0.0299832	0.639113	0.0474739	0.457636
joint25	FootRight	Y	The variance of phases	0.0260198	0.684061	0.0868549	0.173615	-0.0742841	0.244768	0.0431165	0.49999	0.125585	0.0486648	0.175201	0.00576387	0.115569	0.0698051	-0.211201	0.000837169	0.00511801	0.936215	-0.294871	2.4048e-06	-0.00221487	0.972373	0.215541	0.000648479	0.164611	0.00955184	-0.0698596	0.274087	0.0587039	0.358243	-0.00160571	0.979969	0.0659675	0.301778
joint25	FootRight	Y	The standard deviation of phases	0.0122986	0.847495	0.0560447	0.380468	-0.0726875	0.255085	0.0464551	0.467356	0.112832	0.0767358	0.184911	0.00353918	0.108671	0.0883286	-0.21808	0.000557172	0.0174419	0.785045	-0.283981	5.78325e-06	0.00332726	0.958507	0.202414	0.0013828	0.164988	0.00938615	-0.0830406	0.193357	0.0733998	0.250445	-0.0207597	0.74545	0.0660301	0.301319
joint25	FootRight	Y	The skewness of phases	0.0447977	0.483408	0.140414	0.027347	0.000526889	0.993427	0.0559791	0.381027	0.0981416	0.123973	0.0833079	0.191922	0.0826651	0.195385	-0.127478	0.0453408	-0.00160347	0.979997	-0.232224	0.000231746	-0.0426295	0.504849	0.176312	0.00545747	0.0957554	0.133425	-0.0228945	0.720316	0.0461089	0.470684	-0.0257944	0.686652	0.0669493	0.294625
joint25	FootRight	Y	The kurtosis of phases	0.0479663	0.452979	0.187026	0.00317246	-0.0042433	0.947099	0.0526593	0.409951	0.111154	0.0812532	0.0536438	0.401241	0.110423	0.0832852	-0.108194	0.089741	-0.015755	0.805397	-0.205991	0.00113005	-0.0464689	0.467223	0.184721	0.00357401	0.0804601	0.207612	-0.010649	0.86775	0.03319	0.603678	-0.0101444	0.873963	0.0497704	0.436146
joint25	FootRight	Y	The mean of amplitudes	0.492313	1.74862e-16	-0.0847033	0.184558	0.473305	3.41006e-15	-0.125187	0.0493876	0.0791977	0.214856	0.257484	4.21422e-05	-0.103362	0.105112	-0.0746134	0.242677	0.00972997	0.879071	-0.215968	0.000632198	0.0613818	0.336701	-0.0103195	0.871806	0.107415	0.0920917	0.0798965	0.210823	-0.0106952	0.86718	0.0358446	0.575027	-0.00965615	0.879982
joint25	FootRight	Y	The variance of amplitudes	0.417686	7.55863e-12	-0.0913723	0.152218	0.470896	4.90436e-15	-0.131154	0.0394278	0.155026	0.0147348	0.299992	1.57185e-06	-0.149394	0.0188138	-0.0467555	0.464478	0.027077	0.671954	-0.189428	0.00279792	0.082658	0.195424	-0.0884217	0.165954	0.0681112	0.286306	0.0779894	0.221956	-0.0278426	0.663239	-0.0161635	0.800456	-0.00337542	0.957907
joint25	FootRight	Y	The standard deviation of amplitudes	0.464841	1.20757e-14	-0.091245	0.152792	0.561415	6.47858e-22	-0.110438	0.0832443	0.0430611	0.500542	0.18072	0.00438127	-0.153403	0.0158227	0.0148345	0.81656	0.00229108	0.971422	-0.15928	0.0121897	0.0365431	0.567594	-0.0500031	0.434001	0.0576365	0.367065	0.119682	0.0603589	-0.0201365	0.75284	0.0230709	0.718251	-0.010784	0.866089
joint25	FootRight	Y	The skewness of amplitudes	-0.0382262	0.549878	-0.0325887	0.610256	0.257541	4.1972e-05	0.0354912	0.578803	-0.0314874	0.622384	-0.0851023	0.182491	-0.190781	0.0026052	0.0517211	0.418354	-0.0751028	0.239592	-0.0595267	0.351535	-0.0496663	0.437107	0.00954778	0.881319	-0.00494863	0.938321	0.0844783	0.185731	-0.0685216	0.283405	-0.0656056	0.304444	-0.0108094	0.865776
joint25	FootRight	Y	The kurtosis of amplitudes	-0.0411812	0.519444	-0.0376661	0.555744	0.239363	0.000145771	0.0408521	0.52279	-0.0418811	0.512363	-0.0894812	0.160919	-0.189857	0.00273549	0.0453716	0.477816	-0.0659445	0.301948	-0.0492946	0.44055	-0.0458966	0.472732	0.0334524	0.600818	-0.00120022	0.985027	0.0856077	0.179898	-0.0731652	0.251967	-0.0540734	0.397476	-0.00996787	0.876138
joint25	FootRight	Z	Direct current component	0.103553	0.104465	-0.0197701	0.757195	0.527327	4.42368e-19	0.110102	0.0841922	-0.125058	0.0496247	-0.262681	2.90129e-05	-0.205759	0.00114506	-0.0061183	0.923783	-0.0629114	0.324776	-0.0661047	0.300772	0.0288828	0.65147	-0.000152055	0.998103	0.00227359	0.97164	-0.022404	0.726066	-0.0186806	0.770192	-0.0924024	0.147631	-0.0222322	0.728083
joint25	FootRight	Z	The mean of phases	0.240579	0.000134511	-0.0986935	0.121863	0.244385	0.000104312	0.0859863	0.177973	0.0738739	0.24739	0.0347034	0.587265	0.176254	0.00547323	-0.290039	3.56547e-06	-0.0511769	0.423274	-0.0518375	0.417306	-0.00975898	0.878714	0.0101111	0.874374	-0.0552862	0.386959	-0.0248936	0.697047	0.0730389	0.252789	-0.0430757	0.500396	0.0191802	0.764223
joint25	FootRight	Z	The variance of phases	0.192901	0.00232714	-0.0811365	0.203804	0.25254	5.9671e-05	0.0741793	0.245436	0.0770757	0.227435	-0.00802674	0.900118	0.205057	0.0011916	-0.283745	5.89186e-06	-0.0573531	0.36943	-0.0543759	0.394837	-0.0211832	0.740441	0.0192981	0.762818	-0.062787	0.325735	-0.0179478	0.778968	0.0691755	0.278826	-0.0230834	0.718106	0.00282824	0.964726
joint25	FootRight	Z	The standard deviation of phases	0.195671	0.00200473	-0.0659762	0.301714	0.248997	7.62367e-05	0.084823	0.183937	0.0770249	0.227743	0.00143594	0.982087	0.188579	0.00292546	-0.284001	5.77383e-06	-0.060599	0.342911	-0.0709223	0.266837	-0.0406773	0.524572	0.0137954	0.829204	-0.0759002	0.234625	-0.00311167	0.961194	0.0700831	0.272552	-0.035239	0.581506	0.0154571	0.809005
joint25	FootRight	Z	The skewness of phases	0.100998	0.113353	-0.0190189	0.766149	0.247304	8.55951e-05	0.0607142	0.341993	0.0856617	0.179622	-0.0640949	0.315739	0.206814	0.00107829	-0.236965	0.000170607	-0.0418203	0.512976	-0.0621514	0.330667	-0.0154744	0.808796	0.0373861	0.558687	-0.0585931	0.359153	0.00704995	0.912221	0.05524	0.387356	-0.00610603	0.923935	-0.00815954	0.898474
joint25	FootRight	Z	The kurtosis of phases	0.0781955	0.220733	0.0126153	0.843618	0.238697	0.000152304	0.0490033	0.443259	0.0858548	0.17864	-0.0870581	0.172607	0.218763	0.000534742	-0.206931	0.00107107	-0.035034	0.583707	-0.0545251	0.393539	-0.00173175	0.978397	0.0517584	0.418019	-0.0509885	0.424986	0.00925152	0.884976	0.0425523	0.505622	-0.00760211	0.905377	-0.0175673	0.783537
joint25	FootRight	Z	The mean of amplitudes	0.255811	4.74409e-05	-0.22289	0.000415978	0.114041	0.0736084	-0.0373632	0.558929	-0.00713211	0.911202	0.00952615	0.881586	0.261824	3.08717e-05	-0.198492	0.00171872	-0.0157855	0.805027	-0.0180044	0.778289	-0.0916932	0.150777	0.0321083	0.615533	-0.0792047	0.214815	0.00667195	0.91691	0.0294796	0.644757	-0.0203243	0.750611	-0.0127623	0.84182
joint25	FootRight	Z	The variance of amplitudes	-0.339468	4.4642e-08	-0.179755	0.00459905	-0.281287	7.14491e-06	-0.284567	5.52172e-06	-0.133575	0.0359002	-0.0470283	0.461873	0.155898	0.014178	0.217644	0.000571939	0.0736688	0.248709	0.0759825	0.234116	-0.119514	0.0607218	0.0139328	0.82753	-0.0380454	0.551768	-0.0173521	0.786124	-0.0145533	0.819976	-0.0210768	0.741699	-0.0186269	0.770833
joint25	FootRight	Z	The standard deviation of amplitudes	-0.349728	1.62429e-08	-0.183296	0.00384454	-0.283826	5.85411e-06	-0.27101	1.5692e-05	-0.141557	0.0261031	-0.0453787	0.477748	0.156909	0.0135562	0.220737	0.000474477	0.0861531	0.17713	0.0790355	0.215799	-0.11312	0.07598	0.010083	0.874719	-0.0466404	0.46558	-0.0220312	0.730446	-0.00641439	0.920106	-0.0073718	0.908231	-0.0219854	0.730984
joint25	FootRight	Z	The skewness of amplitudes	-0.435772	7.18834e-13	0.123734	0.0521088	-0.203336	0.00131313	-0.0679804	0.287235	-0.0769634	0.228116	-0.0222177	0.728253	-0.0805298	0.207217	0.214759	0.000679258	0.0476883	0.455605	0.0589506	0.356224	0.0349127	0.585012	-0.0280888	0.660445	-0.0451697	0.47978	-0.0871012	0.172393	0.0224097	0.725998	-0.054915	0.39016	0.0170138	0.790196
joint25	FootRight	Z	The kurtosis of amplitudes	-0.458371	3.10211e-14	0.140272	0.0275046	-0.193736	0.0022254	-0.0752898	0.238421	-0.0737751	0.248025	-0.0238921	0.70867	-0.0784704	0.219109	0.212215	0.000789043	0.0437281	0.493923	0.0555878	0.384371	0.0361292	0.571993	-0.0182474	0.775377	-0.0563508	0.377869	-0.0854674	0.180615	0.0169249	0.791268	-0.0580972	0.363242	0.0214844	0.736886
joint11	HandLeft	X	Direct current component	-0.302202	1.30494e-06	-0.35675	7.96159e-09	0.0541105	0.397151	-0.345124	2.56835e-08	0.00972357	0.87915	0.166045	0.00893478	-0.0802674	0.208706	-0.00297669	0.962876	0.133511	0.0359893	-0.0732797	0.251224	0.155829	0.0142218	-0.0309115	0.628767	0.0174843	0.784534	0.0204188	0.749489	0.0350571	0.583459	0.0327312	0.608693	-0.0665771	0.297323
joint11	HandLeft	X	The mean of phases	0.211528	0.000821367	0.0925399	0.147026	-0.122231	0.0550529	0.158049	0.0128831	-0.371085	1.75767e-09	0.303644	1.15479e-06	-0.250988	6.64635e-05	-0.227219	0.000318072	0.0760598	0.233639	-0.0176044	0.783092	-0.0170776	0.789428	0.0335994	0.599218	0.00920252	0.885581	-0.0236266	0.711763	-0.0147073	0.818105	-0.0128346	0.840936	0.00356981	0.955486
joint11	HandLeft	X	The variance of phases	0.165988	0.00895848	0.107817	0.0908728	-0.126966	0.0462192	0.227127	0.000319904	-0.217083	0.00059149	0.29595	2.20024e-06	-0.258639	3.88127e-05	-0.245142	9.91254e-05	0.0745137	0.243308	-0.0201022	0.753248	-0.0838177	0.189207	0.0754561	0.237382	0.024154	0.705625	-0.0433334	0.497834	-0.0114395	0.858032	0.0132489	0.835872	0.028657	0.654018
joint11	HandLeft	X	The standard deviation of phases	0.150304	0.018095	0.0989565	0.120867	-0.11338	0.075304	0.23713	0.000168779	-0.223963	0.000389391	0.29527	2.32717e-06	-0.276017	1.07382e-05	-0.249088	7.57639e-05	0.0738111	0.247794	-0.029385	0.645818	-0.0842501	0.186927	0.0692713	0.278159	0.00853908	0.893779	-0.0806604	0.206479	-0.0219204	0.731749	0.012883	0.840345	0.0473963	0.458372
joint11	HandLeft	X	The skewness of phases	0.0282592	0.658515	0.13903	0.0289203	-0.0760476	0.233715	0.222695	0.000420994	-0.0489351	0.443894	0.196677	0.00189809	-0.165442	0.00918969	-0.18652	0.00325696	0.0411848	0.519407	-0.048147	0.451277	-0.108178	0.0897894	0.0867127	0.174323	-0.00596547	0.925681	-0.0840869	0.187785	-0.0145501	0.820015	0.0224769	0.725209	0.0664779	0.298046
joint11	HandLeft	X	The kurtosis of phases	0.0365967	0.567026	0.18222	0.00406107	-0.069707	0.27514	0.193609	0.00224061	-0.0237645	0.710157	0.150453	0.0179793	-0.113254	0.0756299	-0.161306	0.0111199	0.0341027	0.593755	-0.0384033	0.548029	-0.0995583	0.118612	0.0922387	0.148353	0.000753422	0.9906	-0.0485103	0.447865	-0.00590492	0.926433	0.0196895	0.758154	0.046839	0.46368
joint11	HandLeft	X	The mean of amplitudes	0.542447	2.68102e-20	0.239429	0.000145137	-0.232914	0.000221724	0.239607	0.000143445	-0.0546746	0.392241	0.031521	0.622011	0.0876931	0.169484	-0.068216	0.285563	-0.0163128	0.798652	0.00492803	0.938578	-0.0839857	0.188319	0.0707767	0.267822	0.0256827	0.687939	0.0382845	0.549269	0.00898023	0.888326	0.000340824	0.995748	-0.0497343	0.436479
joint11	HandLeft	X	The variance of amplitudes	0.263552	2.72336e-05	0.271565	1.50516e-05	-0.187895	0.00303211	0.270771	1.59754e-05	0.273068	1.34387e-05	-0.0493393	0.440136	0.196167	0.00195153	0.0109672	0.863836	-0.126134	0.0476796	0.0121404	0.849434	-0.114968	0.07128	0.0288226	0.652149	-0.0769706	0.228072	-0.0493573	0.439968	0.0119685	0.851541	-0.049792	0.435947	-0.0070255	0.912524
joint11	HandLeft	X	The standard deviation of amplitudes	0.306465	9.07431e-07	0.187126	0.00315608	-0.170648	0.00718618	0.248607	7.83068e-05	0.241133	0.000129658	-0.0433891	0.497281	0.190925	0.00258542	-0.0270365	0.672417	-0.0398649	0.532893	-0.00074025	0.990765	-0.0907156	0.155198	0.0681254	0.286205	-0.0334037	0.601347	-0.00652081	0.918785	2.64054e-05	0.999671	-0.0205222	0.748264	-0.0255554	0.689405
joint11	HandLeft	X	The skewness of amplitudes	-0.271648	1.49581e-05	0.0456334	0.475277	0.151478	0.0172025	0.156317	0.0139173	0.423968	3.39158e-12	0.0453024	0.478488	0.0457208	0.474431	0.0145314	0.820243	0.0284855	0.655955	-0.00724164	0.909844	-0.0718195	0.260818	0.0607182	0.341961	0.0696792	0.275332	-0.0469303	0.462808	-0.031415	0.623185	-0.00224925	0.971944	-0.020793	0.745056
joint11	HandLeft	X	The kurtosis of amplitudes	-0.270279	1.65747e-05	0.0630354	0.323821	0.158759	0.012479	0.151036	0.0175338	0.410281	1.90334e-11	0.0578901	0.364957	0.0416974	0.514216	0.013472	0.833149	0.0203298	0.750546	-0.0100862	0.87468	-0.0647389	0.310891	0.0635587	0.319813	0.0654763	0.3054	-0.0467592	0.464443	-0.0338688	0.596291	-0.0118439	0.853069	-0.017336	0.786318
joint11	HandLeft	Y	Direct current component	0.11875	0.0624017	0.337382	5.45831e-08	-0.07022	0.271614	0.0266956	0.676312	-0.23202	0.00023479	-0.101861	0.110286	-0.0306583	0.631582	-0.265772	2.31518e-05	0.0757481	0.235567	0.00494423	0.938376	0.157276	0.013336	0.041149	0.51977	-0.0451211	0.480253	0.0873448	0.171192	0.027952	0.661997	-0.0183508	0.774138	0.0203107	0.750772
joint11	HandLeft	Y	The mean of phases	0.338346	4.97489e-08	0.348696	1.80124e-08	-0.091237	0.152829	-0.119555	0.0606344	-0.260161	3.48042e-05	0.0795983	0.212537	0.154631	0.0149936	-0.0151782	0.812387	-0.0667959	0.295735	-0.0509369	0.425455	0.0231836	0.716934	-0.13876	0.0292369	0.0214713	0.73704	0.0857548	0.179148	-0.024552	0.701004	-0.0983427	0.123201	-0.0246465	0.699909
joint11	HandLeft	Y	The variance of phases	0.295392	2.30384e-06	0.318409	3.17935e-07	-0.0321092	0.615523	-0.0514726	0.420597	-0.191258	0.0025401	0.0713886	0.263697	0.103578	0.104381	-0.0467756	0.464286	-0.00761635	0.9052	-0.0255217	0.689793	0.0290535	0.649548	-0.136188	0.0323962	0.0371504	0.561171	0.0933847	0.143355	-0.0363502	0.569642	-0.0704127	0.270297	-0.0198249	0.756544
joint11	HandLeft	Y	The standard deviation of phases	0.262269	2.98932e-05	0.307576	8.24709e-07	-0.00977494	0.878517	-0.0665547	0.297487	-0.200035	0.00157855	0.0766201	0.230203	0.0872654	0.171583	-0.0571518	0.371115	0.0137978	0.829175	-0.00578054	0.927979	0.0299515	0.639469	-0.150606	0.0178612	0.0134781	0.833075	0.0878696	0.168624	-0.0435041	0.496141	-0.0856596	0.179633	-0.0201007	0.753265
joint11	HandLeft	Y	The skewness of phases	0.14017	0.0276186	0.245738	9.52084e-05	0.0406752	0.524592	-0.000989185	0.987659	-0.0773113	0.226013	0.0606851	0.342225	0.0906897	0.155317	-0.0587385	0.35796	0.0421841	0.509314	0.00915689	0.886144	0.0323795	0.612551	-0.095693	0.13368	0.0160228	0.802156	0.088693	0.164654	-0.0447566	0.48381	-0.058975	0.356025	-0.0109299	0.864294
joint11	HandLeft	Y	The kurtosis of phases	0.144361	0.0232559	0.26739	2.05485e-05	0.0265546	0.677926	0.0149176	0.81555	-0.0428717	0.502429	0.0388473	0.543409	0.109235	0.086679	-0.0369875	0.562891	0.0170985	0.789176	-0.00626184	0.922	0.0268135	0.674964	-0.0624943	0.328	0.01811	0.777023	0.0882443	0.166808	-0.0387473	0.544448	-0.0483978	0.44892	-0.0165989	0.795198
joint11	HandLeft	Y	The mean of amplitudes	0.389357	2.2955e-10	0.252997	5.78021e-05	-0.0807454	0.205999	0.120507	0.058596	-0.312145	5.54236e-07	-0.0153181	0.81069	-0.0624261	0.32853	-0.202866	0.00134818	-0.063789	0.318059	0.0328667	0.607211	0.0822428	0.197686	-0.00352729	0.956015	0.0357398	0.576145	0.0310046	0.627732	-0.0384409	0.547637	0.00794102	0.901179	-0.0252212	0.693261
joint11	HandLeft	Y	The variance of amplitudes	0.186575	0.00324762	0.219579	0.000509002	-0.0660732	0.301003	0.132798	0.037002	-0.26163	3.13089e-05	-0.0552747	0.387058	-0.1041	0.102638	-0.235708	0.000185152	-0.00949689	0.881947	0.0469804	0.46233	0.0753061	0.238319	0.0189178	0.767356	0.0281131	0.660171	-0.00379102	0.95273	-0.0119384	0.85191	-0.0112922	0.859841	0.000163021	0.997966
joint11	HandLeft	Y	The standard deviation of amplitudes	0.263946	2.64633e-05	0.104445	0.101498	-0.0360954	0.572353	0.164257	0.00970994	-0.220742	0.000474327	-0.0362249	0.570974	-0.1402	0.0275859	-0.226944	0.000323588	-0.0135942	0.831658	0.0542841	0.395637	0.0706544	0.268652	0.00813641	0.898761	-0.0091859	0.885786	0.00271161	0.96618	-0.0183844	0.773736	0.00878688	0.890716	0.00359201	0.955209
joint11	HandLeft	Y	The skewness of amplitudes	-0.311149	6.04741e-07	-0.399799	6.77132e-11	0.10335	0.105152	0.152581	0.0163997	0.18133	0.0042483	0.00036965	0.995388	-0.413315	1.30728e-11	-0.018437	0.773105	0.0260461	0.683759	0.0642479	0.314583	-0.0787091	0.217707	-0.0296693	0.642628	0.0364274	0.568823	0.0287047	0.653479	0.0697741	0.274677	0.0133373	0.834793	0.0170919	0.789256
joint11	HandLeft	Y	The kurtosis of amplitudes	-0.293369	2.72027e-06	-0.38178	5.42171e-10	0.119182	0.0614475	0.143796	0.023807	0.175717	0.00561968	-0.0241253	0.705958	-0.444157	2.30077e-13	0.00254372	0.968273	0.00105222	0.986873	0.0512774	0.422363	-0.0595871	0.351045	-0.0345132	0.589317	0.0337817	0.597236	0.0200092	0.754352	0.0899135	0.158898	-0.00127653	0.984075	0.00135502	0.983096
joint11	HandLeft	Z	Direct current component	0.157155	0.0134082	-0.0216948	0.734406	-0.0440293	0.49095	0.00805037	0.899826	0.241287	0.000128339	-0.130096	0.0410589	0.17073	0.00715807	0.0246544	0.699817	0.00781007	0.902801	-0.00117998	0.985279	-0.11655	0.0674484	0.103961	0.103101	0.135679	0.0330548	-0.0955898	0.134101	-0.0927616	0.146056	0.0108479	0.865303	-0.0291378	0.648598
joint11	HandLeft	Z	The mean of phases	0.413448	1.28574e-11	-0.0349507	0.584603	-0.100351	0.115692	0.0079773	0.90073	0.239651	0.00014303	-0.0648322	0.310193	-0.119858	0.059979	-0.0714957	0.26298	-0.0202867	0.751057	-0.0272375	0.670124	-0.0952894	0.135334	-0.0477988	0.45456	-0.0466344	0.465637	-0.042157	0.509586	-0.0121093	0.849815	0.0429832	0.501318	-0.0157623	0.805308
joint11	HandLeft	Z	The variance of phases	0.294177	2.54601e-06	-0.132195	0.0378765	-0.126424	0.047166	0.0133973	0.83406	0.259251	3.71511e-05	-0.0397291	0.53429	-0.162965	0.0103062	-0.0794146	0.213598	0.005477	0.931751	-0.0187177	0.769747	-0.0588993	0.356643	-0.0720613	0.259212	-0.0370472	0.56226	-0.0296631	0.642698	-0.0358114	0.575381	0.0427773	0.503372	-0.0118868	0.852544
joint11	HandLeft	Z	The standard deviation of phases	0.290748	3.36699e-06	-0.165171	0.00930644	-0.137077	0.0312733	0.029586	0.643563	0.281232	7.17555e-06	-0.0462286	0.469532	-0.182221	0.00406078	-0.0716402	0.262013	-9.12563e-05	0.998861	-0.011965	0.851584	-0.0862212	0.176786	-0.0803099	0.208464	-0.0645803	0.312081	-0.0388907	0.542959	-0.0715069	0.262904	0.049689	0.436898	-0.00684561	0.914755
joint11	HandLeft	Z	The skewness of phases	0.111816	0.0794454	-0.152422	0.0165128	-0.112436	0.0777807	0.0106126	0.868198	0.238884	0.000150447	-0.0312643	0.624853	-0.141109	0.0265847	-0.0586743	0.358486	0.0243129	0.703778	-0.0309739	0.628074	-0.0405103	0.526277	-0.0779861	0.221976	-0.0424641	0.506505	-0.019743	0.757518	-0.0698709	0.27401	0.0376938	0.555453	0.0135345	0.832386
joint11	HandLeft	Z	The kurtosis of phases	0.0823125	0.197305	-0.0866061	0.174855	-0.0906243	0.155616	-0.00149696	0.981325	0.199333	0.00164092	-0.0371868	0.560787	-0.106976	0.0934355	-0.0585977	0.359115	0.021603	0.735487	-0.0377536	0.554825	-0.0209091	0.743682	-0.061107	0.338873	-0.0277583	0.664196	0.00354575	0.955785	-0.0446469	0.484883	0.0201874	0.752235	0.011208	0.860876
joint11	HandLeft	Z	The mean of amplitudes	0.469443	6.09861e-15	-0.48864	3.14974e-16	-0.0903959	0.156665	0.050584	0.428673	0.0108052	0.865828	0.0966497	0.12982	-0.0132985	0.835267	-0.0505348	0.429123	0.0471755	0.460471	0.00535557	0.933261	0.00835543	0.896051	-0.084212	0.187127	-0.00303908	0.962098	-0.00573829	0.928504	-0.0214354	0.737464	0.0210807	0.741653	-0.00892081	0.889061
joint11	HandLeft	Z	The variance of amplitudes	-0.0659473	0.301927	-0.391783	1.73512e-10	-0.0615963	0.335012	0.0773346	0.225873	0.0109013	0.864646	0.200406	0.00154641	0.0363453	0.569695	-0.0428404	0.502742	0.0855391	0.180248	-0.0151298	0.812974	0.0841221	0.187599	-0.152934	0.0161495	0.00477559	0.940474	0.0493447	0.440085	-0.0315527	0.621662	-0.0486702	0.446368	0.0194351	0.761185
joint11	HandLeft	Z	The standard deviation of amplitudes	-0.0502708	0.431541	-0.462095	1.80678e-14	-0.055861	0.382034	0.0810088	0.204519	-0.000576951	0.992802	0.222267	0.000432186	-0.00294937	0.963216	-0.0183935	0.773626	0.105695	0.0974493	-0.00810488	0.899151	0.0768376	0.228879	-0.125071	0.0496014	-0.00577737	0.928018	0.0294574	0.645006	-0.0446502	0.484851	-0.0235044	0.713188	0.0126965	0.842625
joint11	HandLeft	Z	The skewness of amplitudes	-0.506425	1.70507e-17	-0.32434	1.85653e-07	0.0647937	0.310481	0.0809016	0.20512	0.112632	0.0772634	0.28451	5.54648e-06	-0.210313	0.000881513	0.0515176	0.42019	0.121215	0.0571191	-0.0643053	0.31415	0.112256	0.0782622	-0.049187	0.44155	-0.0330564	0.605137	0.000124839	0.998442	-0.0553678	0.386257	-0.014307	0.822973	0.00860008	0.893025
joint11	HandLeft	Z	The kurtosis of amplitudes	-0.509129	1.07807e-17	-0.314652	4.44393e-07	0.0634721	0.320474	0.0778107	0.22302	0.115062	0.0710478	0.277733	9.41289e-06	-0.218279	0.000550562	0.0472996	0.45929	0.11614	0.0684244	-0.0655774	0.304652	0.115587	0.069761	-0.0415659	0.515545	-0.0347715	0.586531	-0.00260581	0.967498	-0.0562849	0.378427	-0.0149651	0.814973	0.0121707	0.849063
joint15	HandRight	X	Direct current component	-0.359053	6.27731e-09	-0.329143	1.19071e-07	0.148515	0.0195315	-0.156224	0.0139751	-0.193661	0.00223433	0.140715	0.0270151	0.0674314	0.291154	-0.0330306	0.605418	-0.0989527	0.120882	-0.0888154	0.164069	-0.0939451	0.140958	0.042163	0.509526	-0.0760449	0.233731	-0.0531052	0.405993	-0.0084951	0.894323	0.0219615	0.731266	0.00633645	0.921074
joint15	HandRight	X	The mean of phases	0.0700362	0.272874	-0.10136	0.112056	-0.0561818	0.379302	0.25043	6.90772e-05	-0.290837	3.3426e-06	0.014169	0.824653	0.0388683	0.543191	0.129062	0.0427069	-0.0278864	0.662742	0.0884415	0.165859	-0.0770415	0.227642	-0.128595	0.0434701	0.0951337	0.135976	0.0478332	0.454236	-0.0209178	0.743579	0.0202606	0.751366	0.0250964	0.694702
joint15	HandRight	X	The variance of phases	-0.0334081	0.6013	-0.0789432	0.216337	-0.0095481	0.881315	0.214683	0.000682316	-0.231838	0.000237528	-0.0322703	0.613751	0.0255507	0.689459	0.108423	0.0890621	-0.00470819	0.941313	0.177676	0.00510153	-0.0791864	0.214921	-0.17073	0.00715823	0.0896254	0.160243	0.00209534	0.973863	-0.017931	0.77917	0.0150105	0.814422	-0.0102593	0.872548
joint15	HandRight	X	The standard deviation of phases	-0.0305025	0.633317	-0.0701014	0.272426	-0.0309682	0.628137	0.223021	0.000412657	-0.22025	0.000488722	-0.0275371	0.666711	0.00804724	0.899864	0.109692	0.0853599	-0.0066759	0.916861	0.18118	0.0042806	-0.0884269	0.165929	-0.192886	0.00232906	0.0848729	0.183677	-0.00381567	0.952423	-0.0190609	0.765648	0.0127542	0.84192	-0.0183762	0.773833
joint15	HandRight	X	The skewness of phases	-0.153182	0.015976	0.0144728	0.820956	0.0882052	0.166998	0.0859859	0.177975	-0.0863648	0.176064	-0.0816532	0.200929	0.0662484	0.29972	0.0546985	0.392034	0.0206507	0.746741	0.185654	0.00340616	-0.0301385	0.637378	-0.145316	0.0223493	0.0244772	0.701872	-0.0526789	0.409777	-0.00433787	0.945921	0.0100173	0.875529	-0.0413013	0.518225
joint15	HandRight	X	The kurtosis of phases	-0.127118	0.0459568	0.0264352	0.679294	0.0943665	0.139177	0.0848402	0.183847	-0.0835349	0.19071	-0.0862283	0.176751	0.0955204	0.134385	0.0542062	0.396316	0.0124672	0.845431	0.164275	0.00970183	-0.0186656	0.770371	-0.0997106	0.118047	0.0233817	0.714621	-0.0327899	0.60805	-0.00785384	0.902259	0.000762133	0.990492	-0.0421674	0.509482
joint15	HandRight	X	The mean of amplitudes	0.627599	1.86204e-28	0.240653	0.000133858	-0.138496	0.0295481	0.0463613	0.468256	-0.0292551	0.647278	-0.120867	0.0578413	-0.0196066	0.759141	-0.0490523	0.442803	0.107876	0.0906944	0.109369	0.0862904	0.00903247	0.887681	-0.0228087	0.72132	0.0241604	0.70555	0.011218	0.860752	0.0306912	0.631216	-0.0141122	0.825344	-0.00275971	0.96558
joint15	HandRight	X	The variance of amplitudes	0.415353	1.01357e-11	0.294121	2.55765e-06	-0.136087	0.0325263	-0.0309913	0.62788	0.254022	5.38035e-05	-0.144918	0.0227235	-0.0154571	0.809005	-0.110999	0.081679	0.184613	0.00359388	0.212845	0.000760425	0.036598	0.567013	0.0325173	0.611039	0.0461505	0.470284	-0.0483798	0.449089	-0.00988122	0.877206	-0.0335076	0.600216	0.0235946	0.712136
joint15	HandRight	X	The standard deviation of amplitudes	0.472853	3.65128e-15	0.328667	1.2447e-07	-0.12815	0.0442069	-0.0513988	0.421264	0.17099	0.00706947	-0.120631	0.0583361	-0.0166617	0.79444	-0.12086	0.0578555	0.137678	0.0305327	0.137083	0.0312651	0.0590183	0.35567	-0.0341662	0.593068	3.74623e-05	0.999533	-0.0191847	0.76417	0.028837	0.651987	-0.0133863	0.834195	0.0005137	0.993591
joint15	HandRight	X	The skewness of amplitudes	-0.316663	3.717e-07	0.168636	0.00790897	0.0951507	0.135906	-0.0978549	0.125081	0.154069	0.015368	-0.0526153	0.410343	-0.0441348	0.489911	-0.0915379	0.151473	-0.00297485	0.962899	0.132706	0.0371345	-0.00606756	0.924413	-0.0330285	0.605441	-0.0247107	0.699164	0.0389103	0.542755	-0.0183344	0.774334	-0.0465727	0.466228	0.0124784	0.845294
joint15	HandRight	X	The kurtosis of amplitudes	-0.31663	3.72771e-07	0.183831	0.0037409	0.102895	0.1067	-0.0985867	0.122269	0.12876	0.0431983	-0.050927	0.425545	-0.0300358	0.638525	-0.080022	0.210106	-0.00981968	0.877965	0.145368	0.0223008	0.00302	0.962336	-0.0348676	0.585497	-0.024197	0.705125	0.0488595	0.4446	-0.0068022	0.915294	-0.0711551	0.265266	0.0150738	0.813654
joint15	HandRight	Y	Direct current component	0.188784	0.00289422	0.37515	1.12979e-09	-0.147261	0.020597	-0.0911009	0.153444	0.237517	0.000164564	-0.110245	0.083787	-0.0129024	0.840107	0.0354674	0.579058	0.280373	7.67279e-06	0.0555501	0.384693	0.128306	0.0439466	-0.150064	0.018282	0.0611127	0.338827	-0.04758	0.45663	0.0164047	0.797542	-0.0261109	0.683015	0.0390538	0.541266
joint15	HandRight	Y	The mean of phases	0.205549	0.00115882	0.123034	0.0534624	-0.0736991	0.248514	0.168907	0.00780812	-0.0115925	0.856153	0.0885809	0.16519	-0.185576	0.00341988	0.204728	0.001214	-0.139061	0.0288848	-0.184008	0.00370708	-0.0569737	0.37261	-0.0644257	0.313243	-0.0585194	0.359759	0.00255276	0.96816	0.00532204	0.933678	-0.0110203	0.863183	0.0257402	0.687276
joint15	HandRight	Y	The variance of phases	0.137344	0.0309415	0.132791	0.0370113	-0.0601254	0.346704	0.222306	0.000431165	0.0430125	0.501025	0.00410202	0.948858	-0.248004	8.16055e-05	0.215677	0.000643249	-0.116817	0.0668186	-0.167131	0.00849142	-0.054854	0.390687	0.00405046	0.949499	-0.021523	0.73643	0.0499613	0.434385	0.02343	0.714057	0.0033457	0.958277	0.0117549	0.854161
joint15	HandRight	Y	The standard deviation of phases	0.112281	0.0781957	0.0980439	0.12435	-0.044103	0.490224	0.205619	0.00115423	0.0205058	0.748459	-0.000399512	0.995016	-0.267567	2.02802e-05	0.212589	0.000771911	-0.105405	0.0983779	-0.181071	0.00430438	-0.049963	0.43437	0.0104042	0.870762	-0.0326725	0.609337	0.0481901	0.450871	0.0145063	0.820548	-0.00064338	0.991973	0.0280663	0.660701
joint15	HandRight	Y	The skewness of phases	-0.00393069	0.950991	0.121919	0.05568	0.00306361	0.961792	0.1831	0.00388324	0.0691885	0.278735	-0.0634987	0.320271	-0.178986	0.00477943	0.154889	0.0148242	-0.0899733	0.15862	-0.124834	0.0500386	-0.0339704	0.595188	0.0803147	0.208437	-0.0101644	0.873717	0.0874916	0.17047	0.0286115	0.654532	0.00681893	0.915086	0.0203197	0.750666
joint15	HandRight	Y	The kurtosis of phases	0.0170374	0.789912	0.173551	0.00624718	0.00574725	0.928392	0.174251	0.00603799	0.0907524	0.15503	-0.0634003	0.321023	-0.117144	0.0660542	0.136185	0.0323998	-0.0893971	0.161314	-0.10175	0.110676	-0.0399839	0.53167	0.0766085	0.230274	-0.00795837	0.900964	0.0822489	0.197652	0.0272693	0.669761	0.00721689	0.910151	0.0123801	0.846498
joint15	HandRight	Y	The mean of amplitudes	0.466125	9.99076e-15	0.401703	5.39482e-11	-0.224997	0.000365289	-0.0414431	0.516789	0.164372	0.0096581	-0.0514377	0.420913	-0.155893	0.0141815	0.243551	0.000110327	0.0919047	0.149834	-0.0880208	0.16789	0.155719	0.0142908	-0.0398178	0.533378	0.0393794	0.537897	0.0226012	0.723751	-0.043147	0.499687	0.016717	0.793773	-0.0293591	0.64611
joint15	HandRight	Y	The variance of amplitudes	0.292998	2.80382e-06	0.457272	3.63396e-14	-0.252649	5.92233e-05	-0.0329483	0.606318	0.283769	5.88079e-06	-0.133043	0.0366513	-0.11281	0.0767916	0.19948	0.00162771	0.184047	0.00369966	0.0170746	0.789465	0.115484	0.0700122	-0.0298917	0.640138	0.0110786	0.862466	-0.00495129	0.938288	-0.0332279	0.603264	-0.0212702	0.739414	0.005118	0.936215
joint15	HandRight	Y	The standard deviation of amplitudes	0.356463	8.19969e-09	0.360584	5.35382e-09	-0.220087	0.000493578	-0.0489268	0.443972	0.210528	0.000870616	-0.11539	0.0702405	-0.117311	0.0656667	0.156915	0.0135522	0.160661	0.0114511	0.000922443	0.988492	0.131782	0.0384849	-0.00569643	0.929024	0.0227176	0.722387	0.0143809	0.822073	-0.0341899	0.592811	-0.00170613	0.978717	-0.0215988	0.735537
joint15	HandRight	Y	The skewness of amplitudes	-0.375562	1.07983e-09	-0.160692	0.0114349	0.0592924	0.353437	0.182152	0.00407513	0.0448316	0.483076	-0.142465	0.0251499	-0.186126	0.00332406	0.0983403	0.12321	0.102504	0.108045	0.118264	0.0634876	-0.0975073	0.126434	0.0192652	0.76321	-0.0032281	0.959743	-0.0243103	0.703808	0.0929645	0.145172	0.0190246	0.766081	-0.033123	0.60441
joint15	HandRight	Y	The kurtosis of amplitudes	-0.358389	6.72367e-09	-0.155381	0.0145061	0.0754211	0.2376	0.177883	0.00504927	0.0467302	0.46472	-0.142167	0.02546	-0.184962	0.00352989	0.119251	0.0612954	0.101625	0.111117	0.121882	0.0557554	-0.0978542	0.125083	0.00464382	0.942114	-0.0210452	0.742073	-0.031907	0.61775	0.0930632	0.144744	0.0103062	0.871969	-0.0280973	0.660349
joint15	HandRight	Z	Direct current component	-0.143816	0.0237878	0.251588	6.37571e-05	-0.0354345	0.579411	0.111344	0.0807291	-0.185475	0.00343781	-0.11329	0.0755379	-0.10443	0.101546	0.00868901	0.891925	0.072072	0.259141	0.0661675	0.300312	0.0370653	0.562069	-0.255267	4.92979e-05	0.0977643	0.125432	0.0719466	0.259973	-0.0306426	0.631757	0.149204	0.018967	-0.0204227	0.749443
joint15	HandRight	Z	The mean of phases	0.38168	5.48249e-10	-0.218119	0.000555875	-0.156844	0.0135949	-0.101728	0.110755	0.156995	0.013504	0.0400008	0.531496	-0.0235683	0.712443	0.146474	0.0212917	0.0198583	0.756146	0.0730885	0.252466	0.0232744	0.715873	-0.0996373	0.118319	-0.0139679	0.827102	-0.00883614	0.890107	-0.0303515	0.635	-0.022197	0.728496	-0.00241582	0.969867
joint15	HandRight	Z	The variance of phases	0.234279	0.000203093	-0.277051	9.91965e-06	-0.181967	0.00411356	-0.0699089	0.273749	0.139145	0.0287867	0.0414579	0.516638	-0.066482	0.298015	0.156758	0.0136471	0.0137362	0.829926	0.0489241	0.443997	0.0193773	0.761873	-0.120206	0.0592346	0.0472801	0.459477	-0.0351734	0.58221	-0.0201623	0.752534	-0.0297575	0.64164	0.00602603	0.924929
joint15	HandRight	Z	The standard deviation of phases	0.23052	0.000258319	-0.293583	2.67296e-06	-0.190228	0.00268244	-0.0593415	0.353038	0.135856	0.0328252	0.0602832	0.345437	-0.0822593	0.197595	0.17956	0.00464418	0.013666	0.830783	0.0448602	0.482797	0.0065111	0.918906	-0.119693	0.060334	0.0499811	0.434203	-0.0368973	0.563844	-0.0380343	0.551885	-0.0227101	0.722476	0.00024467	0.996947
joint15	HandRight	Z	The skewness of phases	0.0243412	0.70345	-0.211936	0.000802019	-0.148297	0.0197137	-0.0316776	0.620281	0.0971985	0.127645	0.0348329	0.58587	-0.0820122	0.19895	0.130796	0.039974	0.00122592	0.984706	-0.00210454	0.973748	-0.0126801	0.842826	-0.0976867	0.125734	0.0983892	0.123023	-0.0307397	0.630676	-0.0192897	0.762918	-0.0132111	0.836334	0.000873772	0.989099
joint15	HandRight	Z	The kurtosis of phases	0.0134708	0.833164	-0.13597	0.0326769	-0.117081	0.0662	-0.0315876	0.621275	0.0990703	0.120438	0.00895353	0.888656	-0.0450423	0.481021	0.100749	0.114249	0.00368152	0.954094	-0.00695709	0.913372	0.00147212	0.981635	-0.0729566	0.253325	0.089344	0.161564	-0.0143489	0.822463	-0.0049594	0.938187	-0.0190491	0.765788	-5.95711e-05	0.999257
joint15	HandRight	Z	The mean of amplitudes	0.455605	4.61463e-14	-0.42018	5.50975e-12	-0.288793	3.94217e-06	-0.0516631	0.418877	-0.0744409	0.243771	0.110197	0.0839227	0.0833067	0.191928	0.00742996	0.90751	-0.148776	0.0193159	-0.0375295	0.557179	0.0228104	0.7213	0.0359761	0.573624	-0.0773892	0.225545	0.00394087	0.950864	-0.0137428	0.829846	0.0749078	0.240818	-0.0186349	0.770737
joint15	HandRight	Z	The variance of amplitudes	-0.116998	0.0663942	-0.242081	0.00012173	-0.18001	0.00454041	0.051901	0.416735	-0.0779724	0.222057	0.111788	0.0795198	0.105766	0.0972218	-0.125771	0.048329	-0.191143	0.00255567	-0.123818	0.0519477	0.0778904	0.222545	0.0312578	0.624925	0.00884303	0.890022	-0.0200619	0.753727	-0.0137238	0.830078	-0.0391852	0.539906	0.0355499	0.578175
joint15	HandRight	Z	The standard deviation of amplitudes	-0.122098	0.0553199	-0.304286	1.09335e-06	-0.170233	0.00733026	0.0824225	0.196704	-0.117842	0.0644448	0.136882	0.031517	0.0818896	0.199624	-0.0816493	0.200951	-0.166848	0.00860479	-0.115589	0.0697568	0.0270255	0.672542	0.0492534	0.440933	0.00474937	0.9408	-0.0254066	0.691121	-0.0203997	0.749716	0.0053351	0.933515	0.0137572	0.829671
joint15	HandRight	Z	The skewness of amplitudes	-0.556175	1.85539e-21	-0.293996	2.58415e-06	0.0523229	0.412953	0.169431	0.0076162	-0.0852775	0.18159	0.0959058	0.132814	0.00541105	0.932571	0.00965351	0.880015	-0.0666593	0.296726	-0.0505424	0.429053	-0.0597611	0.349638	0.044756	0.483816	0.0275095	0.667025	-0.0584083	0.360673	-0.0281922	0.659275	-0.0182018	0.775923	-0.00354307	0.955819
joint15	HandRight	Z	The kurtosis of amplitudes	-0.549395	7.0462e-21	-0.300415	1.51696e-06	0.0606459	0.342537	0.15393	0.0154621	-0.0873211	0.171308	0.105208	0.0990097	0.0125685	0.844192	0.00827955	0.896989	-0.0680673	0.286618	-0.0464649	0.467261	-0.0536326	0.40134	0.0439136	0.492091	0.0201973	0.752118	-0.0544308	0.394359	-0.0340168	0.594686	-0.023002	0.719057	-0.00681892	0.915086
joint12	HandTipLeft	X	Direct current component	-0.297847	1.8801e-06	-0.321354	2.43761e-07	0.071925	0.260117	-0.316612	3.73399e-07	0.0231225	0.717648	0.178761	0.00483344	-0.075245	0.238701	0.0197061	0.757957	0.152083	0.0167582	-0.0934727	0.142977	0.144767	0.0228666	-0.0379157	0.553126	0.0122436	0.848169	0.0196986	0.758046	0.024465	0.702013	0.0186478	0.770584	-0.0810633	0.204213
joint12	HandTipLeft	X	The mean of phases	0.146925	0.0208913	0.0956871	0.133704	-0.135484	0.03331	0.116619	0.0672851	-0.411947	1.54928e-11	0.322365	2.22364e-07	-0.225045	0.000364199	-0.174529	0.00595645	0.018087	0.777299	-0.0189316	0.767191	0.0402965	0.528463	0.00637696	0.920571	0.0128096	0.841242	-0.036317	0.569995	-0.0206634	0.746591	-0.025661	0.688189	0.0231971	0.716776
joint12	HandTipLeft	X	The variance of phases	0.125852	0.0481824	0.115752	0.0693602	-0.1394	0.0284932	0.201105	0.00148751	-0.26715	2.09165e-05	0.33846	4.92076e-08	-0.222566	0.00042433	-0.190071	0.0027048	0.0238694	0.708935	-0.030819	0.629794	-0.0176417	0.782644	0.0694916	0.27663	0.0398651	0.53289	-0.059641	0.350609	-0.0410366	0.520913	0.0219806	0.731041	0.0371057	0.561642
joint12	HandTipLeft	X	The standard deviation of phases	0.108123	0.0899541	0.108381	0.089184	-0.128493	0.043637	0.201935	0.00142031	-0.278398	8.94226e-06	0.345832	2.39484e-08	-0.237933	0.000160142	-0.183986	0.00371133	0.0182516	0.775326	-0.0356289	0.57733	-0.00942958	0.882778	0.0569714	0.37263	0.0325514	0.610665	-0.096683	0.129687	-0.0518885	0.416848	0.0267136	0.676106	0.049804	0.435836
joint12	HandTipLeft	X	The skewness of phases	0.0222361	0.728037	0.152639	0.0163583	-0.0953414	0.13512	0.203099	0.00133074	-0.0885471	0.165352	0.275083	1.15322e-05	-0.119238	0.0613236	-0.129533	0.0419499	-0.00038951	0.99514	-0.0629199	0.32471	-0.0545693	0.393154	0.0842105	0.187135	0.0185833	0.771355	-0.108157	0.0898534	-0.0609137	0.340406	0.0725888	0.255732	0.0614626	0.336065
joint12	HandTipLeft	X	The kurtosis of phases	0.0332743	0.602758	0.199884	0.00159176	-0.0898404	0.159238	0.177829	0.00506295	-0.0603327	0.34504	0.224053	0.000387233	-0.0693489	0.27762	-0.111505	0.0802902	-0.00479981	0.940173	-0.0527617	0.40904	-0.0535473	0.40209	0.0940593	0.140474	0.0162183	0.799793	-0.0681905	0.285744	-0.0511302	0.423698	0.0669417	0.29468	0.0443634	0.487663
joint12	HandTipLeft	X	The mean of amplitudes	0.514245	4.47878e-18	0.236373	0.000177316	-0.220764	0.000473703	0.244011	0.000106971	-0.0601632	0.346399	0.0282248	0.658905	0.114104	0.0734477	-0.0763614	0.231785	-0.0210579	0.741922	0.0299171	0.639854	-0.0844788	0.185729	0.0719105	0.260213	0.0276728	0.665168	0.0461702	0.470094	0.0161662	0.800423	0.00510341	0.936396	-0.0372559	0.560059
joint12	HandTipLeft	X	The variance of amplitudes	0.2664	2.21059e-05	0.273157	1.33485e-05	-0.183624	0.00378072	0.273095	1.34112e-05	0.268511	1.89103e-05	-0.0546447	0.3925	0.208446	0.000981967	-6.19364e-05	0.999227	-0.125929	0.0480456	0.0293679	0.646011	-0.130762	0.0400257	0.0301645	0.637087	-0.0675191	0.290526	-0.0448565	0.482834	0.0170734	0.789479	-0.0395741	0.535887	-0.00429162	0.946497
joint12	HandTipLeft	X	The standard deviation of amplitudes	0.302793	1.24122e-06	0.178505	0.00489557	-0.157541	0.0131793	0.248215	8.04344e-05	0.238763	0.000151646	-0.048488	0.448074	0.206601	0.00109146	-0.0398686	0.532854	-0.0328123	0.607806	0.0192144	0.763816	-0.10464	0.100859	0.0679183	0.287676	-0.0227873	0.721571	0.00133798	0.983308	0.00476073	0.940659	-0.0138902	0.828048	-0.0224361	0.725689
joint12	HandTipLeft	X	The skewness of amplitudes	-0.226618	0.000330254	0.0546006	0.392883	0.145455	0.0222206	0.178625	0.00486622	0.407827	2.5719e-11	0.0409082	0.522219	0.0449567	0.481855	0.0217047	0.734289	0.020668	0.746537	-0.0238512	0.709146	-0.0535003	0.402504	0.0568928	0.373291	0.0928944	0.145477	-0.0232785	0.715825	-0.0412386	0.518861	0.0142523	0.823639	-0.0428602	0.502544
joint12	HandTipLeft	X	The kurtosis of amplitudes	-0.23226	0.000231215	0.0742945	0.244702	0.150846	0.0176782	0.167533	0.0083323	0.394722	1.23251e-10	0.0543899	0.394715	0.0385969	0.546013	0.0230804	0.71814	0.00558293	0.930434	-0.0209345	0.743382	-0.0440442	0.490804	0.06076	0.341628	0.0828365	0.194457	-0.027443	0.667783	-0.0410836	0.520435	0.00663754	0.917337	-0.0392096	0.539654
joint12	HandTipLeft	Y	Direct current component	0.0100107	0.875611	0.273954	1.25662e-05	-0.128483	0.0436538	-0.0349142	0.584995	-0.229521	0.000275202	0.0146347	0.818987	-0.0447832	0.48355	-0.277895	9.29603e-06	0.116868	0.0666993	-0.0288788	0.651515	0.131109	0.0394959	0.0449311	0.482105	-0.0158491	0.804257	0.0370173	0.562576	0.000187643	0.997659	-0.0152966	0.810951	-0.0289364	0.650866
joint12	HandTipLeft	Y	The mean of phases	0.277965	9.24599e-06	0.403657	4.26609e-11	-0.07418	0.245432	-0.113521	0.0749385	-0.266907	2.1295e-05	0.0625817	0.327323	0.172857	0.00646122	-0.0140801	0.825735	-0.1072	0.0927467	-0.106645	0.094459	-0.0092291	0.885252	-0.136131	0.0324698	0.0499043	0.434911	0.131486	0.0389268	0.0453802	0.477733	-0.0822573	0.197606	-0.0170031	0.790326
joint12	HandTipLeft	Y	The variance of phases	0.232244	0.00023145	0.397289	9.11598e-11	-0.0216973	0.734376	-0.0530107	0.40683	-0.207007	0.00106646	0.0449295	0.482121	0.115048	0.0710841	-0.031948	0.617298	-0.0530298	0.40666	-0.0831704	0.192659	-0.0170124	0.790214	-0.127178	0.0458537	0.0413102	0.518135	0.151544	0.0171534	0.0408729	0.522578	-0.0544743	0.393981	-0.00637189	0.920634
joint12	HandTipLeft	Y	The standard deviation of phases	0.219676	0.000506039	0.386218	3.28611e-10	-0.00270613	0.966248	-0.0726165	0.255551	-0.220692	0.000475796	0.0551645	0.388007	0.121194	0.0571615	-0.0438842	0.492381	-0.0431404	0.499753	-0.0796858	0.212033	-0.0237766	0.710016	-0.145605	0.0220811	0.0251422	0.694173	0.154086	0.0153567	0.0292972	0.646806	-0.0599773	0.347894	0.00263146	0.967179
joint12	HandTipLeft	Y	The skewness of phases	0.0945203	0.13853	0.321871	2.32579e-07	0.0381602	0.550567	-0.00453811	0.943429	-0.115528	0.0699055	0.0391773	0.539988	0.101617	0.111146	-0.0266556	0.67677	-0.0114707	0.857649	-0.0467051	0.46496	-0.0177041	0.781893	-0.0920245	0.149301	0.00394417	0.950823	0.15042	0.018005	0.023299	0.715586	-0.0253467	0.691812	0.0132213	0.83621
joint12	HandTipLeft	Y	The kurtosis of phases	0.0930617	0.144751	0.326369	1.54041e-07	0.0244617	0.702051	0.0135815	0.831813	-0.0737491	0.248192	0.0191689	0.764358	0.109889	0.0847987	-0.00913657	0.886395	-0.0262848	0.681019	-0.0439855	0.491381	-0.0193805	0.761836	-0.0603113	0.345211	0.00467768	0.941692	0.139435	0.0284526	0.0205171	0.748325	-0.0213456	0.738523	0.00241341	0.969897
joint12	HandTipLeft	Y	The mean of amplitudes	0.36284	4.22902e-09	0.272161	1.43912e-05	-0.0830746	0.193174	0.125176	0.0494083	-0.321788	2.34346e-07	-0.0214431	0.737373	-0.046085	0.470915	-0.203142	0.0013275	-0.0542861	0.395619	0.0314666	0.622614	0.0777889	0.22315	-0.0133887	0.834165	0.0425096	0.506049	0.0355301	0.578387	-0.0321497	0.615077	0.0193963	0.761647	-0.0398362	0.533188
joint12	HandTipLeft	Y	The variance of amplitudes	0.173997	0.00611323	0.230015	0.000266729	-0.0705625	0.269277	0.133425	0.0361102	-0.25579	4.7513e-05	-0.0532095	0.40507	-0.0896633	0.160065	-0.230708	0.000255268	-0.00374096	0.953354	0.0518448	0.417241	0.07721	0.226624	0.0138973	0.827963	0.0373489	0.559079	0.00190776	0.976202	-0.0169944	0.790429	-0.00682308	0.915035	-0.00659838	0.917823
joint12	HandTipLeft	Y	The standard deviation of amplitudes	0.24584	9.45537e-05	0.125528	0.0487666	-0.0469605	0.46252	0.162357	0.0105981	-0.223003	0.000413096	-0.037756	0.5548	-0.117862	0.0643998	-0.219907	0.000498989	0.00745206	0.907236	0.0610159	0.339595	0.0769901	0.227953	0.00265695	0.966861	-0.00119559	0.985084	0.00574633	0.928404	-0.0294542	0.645042	0.0152456	0.81157	-0.0048078	0.940073
joint12	HandTipLeft	Y	The skewness of amplitudes	-0.365461	3.20752e-09	-0.373077	1.41641e-09	0.108185	0.0897698	0.134966	0.0339968	0.252478	5.99313e-05	-0.0156814	0.806288	-0.337221	5.54357e-08	0.00988458	0.877165	0.0264507	0.679117	0.0747027	0.242112	-0.0446545	0.484809	-0.0349968	0.584107	0.0143594	0.822336	0.0526928	0.409653	0.0359815	0.573566	0.0388728	0.543145	0.0381249	0.550936
joint12	HandTipLeft	Y	The kurtosis of amplitudes	-0.340565	4.01379e-08	-0.353459	1.11445e-08	0.138165	0.0299432	0.117671	0.0648365	0.246067	9.31056e-05	-0.0400099	0.531403	-0.359587	5.93868e-09	0.0234997	0.713243	-0.00644343	0.919746	0.062413	0.328631	-0.0156192	0.807041	-0.0268823	0.674177	0.00935063	0.883752	0.0468824	0.463266	0.0530079	0.406854	0.0371369	0.561313	0.0192497	0.763395
joint12	HandTipLeft	Z	Direct current component	0.158934	0.0123812	-0.0198277	0.756511	0.0453768	0.477766	0.0149236	0.815477	0.220752	0.000474038	-0.188196	0.00298477	0.129043	0.0427385	0.0381704	0.550461	0.00382434	0.952315	0.014431	0.821464	-0.0973016	0.127239	0.093992	0.140759	0.140985	0.0267195	-0.100379	0.115591	-0.0890674	0.162871	0.0155942	0.807344	-0.0266384	0.676967
joint12	HandTipLeft	Z	The mean of phases	0.412238	1.4943e-11	0.0334417	0.600933	-0.0703414	0.270784	-0.00145257	0.981879	0.187306	0.00312658	-0.0648086	0.310369	-0.109455	0.0860418	-0.0778734	0.222647	-0.011906	0.852307	-0.0227503	0.722004	-0.0741114	0.245869	-0.0379461	0.552807	-0.0332446	0.603082	-0.0412337	0.51891	-0.0219955	0.730866	0.0327404	0.608593	-0.01931	0.762675
joint12	HandTipLeft	Z	The variance of phases	0.326721	1.49108e-07	-0.0829632	0.193773	-0.105895	0.0968145	0.00970629	0.879364	0.224717	0.00037167	-0.0168486	0.792186	-0.166493	0.00874957	-0.0804183	0.207849	0.0207036	0.746115	-0.00660635	0.917724	-0.0448143	0.483246	-0.0595313	0.351497	-0.0196421	0.758719	-0.0373078	0.559511	-0.0431081	0.500074	0.0394	0.537685	-0.0322827	0.613615
joint12	HandTipLeft	Z	The standard deviation of phases	0.326166	1.56955e-07	-0.111761	0.0795925	-0.117205	0.0659111	0.0209025	0.74376	0.255615	4.81042e-05	-0.0186661	0.770364	-0.182571	0.00398916	-0.0738807	0.247347	0.019704	0.757982	-0.00563839	0.929745	-0.0638254	0.317783	-0.0638307	0.317742	-0.0400843	0.530639	-0.0486357	0.446691	-0.0779694	0.222075	0.0469159	0.462945	-0.0250194	0.695592
joint12	HandTipLeft	Z	The skewness of phases	0.164129	0.00976758	-0.127862	0.0446898	-0.0997699	0.117827	0.00643509	0.919849	0.224673	0.000372687	0.0145718	0.819752	-0.154272	0.015232	-0.0605103	0.343619	0.0462422	0.469401	-0.0206316	0.746967	-0.0268593	0.674441	-0.0686557	0.282462	-0.019796	0.756887	-0.0409204	0.522094	-0.0711316	0.265424	0.0424295	0.506852	-0.0191544	0.764532
joint12	HandTipLeft	Z	The kurtosis of phases	0.125869	0.0481529	-0.0677516	0.288864	-0.0774723	0.225046	-0.00737905	0.908141	0.185859	0.0033703	0.00442819	0.944797	-0.120348	0.058933	-0.0602553	0.345661	0.0394359	0.537314	-0.0235986	0.712089	-0.00667654	0.916853	-0.0552612	0.387174	-0.00801914	0.900212	-0.0165354	0.795965	-0.0431932	0.499227	0.0258591	0.685908	-0.0210355	0.742187
joint12	HandTipLeft	Z	The mean of amplitudes	0.461895	1.86006e-14	-0.449442	1.10421e-13	-0.0701031	0.272415	0.0481144	0.451584	-0.0227576	0.721919	0.0963902	0.130858	-0.00229208	0.97141	-0.0461955	0.46985	0.0438549	0.49267	0.000873318	0.989105	0.0204785	0.748781	-0.0825702	0.1959	0.00170138	0.978776	-0.00404666	0.949547	-0.0262377	0.681559	0.0121521	0.84929	0.000326874	0.995922
joint12	HandTipLeft	Z	The variance of amplitudes	-0.0619641	0.332129	-0.394091	1.32673e-10	-0.0463511	0.468354	0.0750734	0.239777	0.00912621	0.886523	0.199416	0.00163344	0.0337019	0.598103	-0.0325015	0.611212	0.0855185	0.180354	-0.0133875	0.83418	0.0778579	0.222739	-0.150134	0.0182272	0.00874039	0.89129	0.0504806	0.429618	-0.0321102	0.615512	-0.0531124	0.405928	0.0157171	0.805856
joint12	HandTipLeft	Z	The standard deviation of amplitudes	-0.0460874	0.470891	-0.458485	3.05155e-14	-0.0450903	0.480553	0.0829248	0.193981	-0.000608772	0.992405	0.21868	0.000537403	-0.00680436	0.915267	-0.00945026	0.882522	0.104358	0.101784	-0.00861401	0.892853	0.0712739	0.264467	-0.11993	0.0598244	-0.00427954	0.946647	0.03077	0.630339	-0.0451114	0.480348	-0.0303918	0.634551	0.0111276	0.861864
joint12	HandTipLeft	Z	The skewness of amplitudes	-0.46585	1.04059e-14	-0.35434	1.01889e-08	0.0639155	0.317098	0.0888308	0.163996	0.13395	0.0353785	0.279179	8.4177e-06	-0.239841	0.000141245	0.0696865	0.275282	0.117582	0.0650398	-0.0425836	0.505308	0.103132	0.105891	-0.0360558	0.572774	-0.0351199	0.582784	0.000646815	0.99193	-0.0508734	0.426033	-0.00981722	0.877996	-0.00439048	0.945267
joint12	HandTipLeft	Z	The kurtosis of amplitudes	-0.479245	1.37445e-15	-0.341858	3.53877e-08	0.0634941	0.320306	0.0848414	0.183841	0.133375	0.0361816	0.273047	1.34594e-05	-0.247688	8.33855e-05	0.0636192	0.319352	0.113965	0.0738021	-0.0450638	0.480811	0.108377	0.0891979	-0.0339946	0.594927	-0.0368487	0.564357	-0.00134021	0.983281	-0.0522181	0.413891	-0.011482	0.85751	0.00171407	0.978618
joint16	HandTipRight	X	Direct current component	-0.336496	5.9429e-08	-0.298167	1.83068e-06	0.170136	0.00736428	-0.121783	0.055955	-0.174963	0.0058314	0.164757	0.00948733	0.0638182	0.317837	-0.00299892	0.962599	-0.131385	0.0390785	-0.122277	0.0549597	-0.0994828	0.118893	0.0409287	0.522009	-0.0897915	0.159466	-0.0628357	0.325359	-0.00651654	0.918838	0.0199842	0.754649	0.00295812	0.963107
joint16	HandTipRight	X	The mean of phases	0.0514894	0.420445	-0.107039	0.093242	-0.082674	0.195337	0.277622	9.49345e-06	-0.271452	1.51793e-05	0.0437585	0.493622	0.0427519	0.503625	0.13469	0.0343677	-0.0454247	0.477301	0.0692835	0.278074	-0.0451157	0.480305	-0.124076	0.0514565	0.0657021	0.303732	0.0612528	0.337719	0.0066357	0.91736	0.0407062	0.524276	0.0579403	0.364541
joint16	HandTipRight	X	The variance of phases	-0.0548792	0.390469	-0.0901781	0.15767	-0.0237388	0.710455	0.258849	3.82353e-05	-0.201828	0.00142878	-0.00114794	0.985679	0.0318454	0.618429	0.119348	0.061084	0.00859256	0.893118	0.154182	0.015292	-0.0284449	0.656415	-0.164977	0.0093907	0.0837001	0.189831	0.0268058	0.675052	0.0083022	0.896709	0.0358017	0.575484	0.0360705	0.572617
joint16	HandTipRight	X	The standard deviation of phases	-0.0565009	0.376597	-0.0803498	0.208238	-0.0428508	0.502638	0.267878	1.98186e-05	-0.189618	0.00277021	0.00804487	0.899894	0.021991	0.730918	0.127743	0.0448901	0.00971451	0.879262	0.156569	0.0137627	-0.042856	0.502586	-0.187156	0.00315111	0.088017	0.167908	0.0240791	0.706495	0.00973789	0.878974	0.0320349	0.616342	0.0382948	0.549161
joint16	HandTipRight	X	The skewness of phases	-0.174468	0.00597431	-0.00043683	0.99455	0.0935658	0.142577	0.131816	0.0384356	-0.0477691	0.454841	-0.0660029	0.301518	0.0822042	0.197896	0.0708414	0.267384	0.0573024	0.369854	0.159604	0.0120126	0.0216183	0.735307	-0.140691	0.0270412	0.042965	0.501499	-0.0204883	0.748666	0.000597736	0.992543	0.023038	0.718636	0.0115309	0.856909
joint16	HandTipRight	X	The kurtosis of phases	-0.146269	0.0214755	0.0104905	0.8697	0.101438	0.111782	0.129537	0.0419435	-0.052025	0.415621	-0.0728997	0.253697	0.107074	0.0931344	0.0692506	0.278303	0.0382464	0.549667	0.137522	0.0307226	0.0288087	0.652306	-0.0951751	0.135805	0.0350575	0.583455	0.000467908	0.994162	-0.00494432	0.938375	0.0119928	0.851243	0.00161731	0.979824
joint16	HandTipRight	X	The mean of amplitudes	0.615715	3.62639e-27	0.245328	9.7886e-05	-0.142423	0.0251932	0.0592504	0.353779	-0.0272238	0.670279	-0.131386	0.0390773	-0.0174569	0.784865	-0.0570955	0.371587	0.120392	0.0588389	0.122835	0.0538519	0.0097785	0.878473	-0.0173151	0.786569	0.0184205	0.773303	0.0127996	0.841364	0.0291464	0.648501	-0.0177878	0.780889	-0.00441321	0.944984
joint16	HandTipRight	X	The variance of amplitudes	0.381862	5.37203e-10	0.263691	2.69596e-05	-0.134468	0.0346681	-0.0355592	0.578076	0.248543	7.86483e-05	-0.15344	0.0157965	-0.0173575	0.786059	-0.126797	0.0465137	0.21442	0.000693034	0.22905	0.000283508	0.0459636	0.472085	0.0457392	0.474253	0.0509792	0.42507	-0.0426847	0.504297	-0.0200035	0.75442	-0.0395768	0.53586	0.0299728	0.639231
joint16	HandTipRight	X	The standard deviation of amplitudes	0.461473	1.97833e-14	0.323669	1.97427e-07	-0.129568	0.0418942	-0.0454248	0.4773	0.172476	0.00658148	-0.138811	0.0291768	-0.018846	0.768214	-0.132938	0.0368007	0.170837	0.00712152	0.146494	0.0212733	0.0699423	0.273519	-0.0301042	0.637761	0.00712601	0.911277	-0.0220452	0.730281	0.0208503	0.744378	-0.0182625	0.775195	0.000864049	0.98922
joint16	HandTipRight	X	The skewness of amplitudes	-0.287689	4.307e-06	0.150985	0.0175723	0.102269	0.108859	-0.0892875	0.161831	0.151559	0.0171423	-0.0528488	0.408266	-0.0414991	0.516222	-0.138114	0.0300047	0.0457336	0.474307	0.101073	0.113083	0.000535666	0.993317	-0.0450879	0.480576	-0.0238676	0.708956	0.0447603	0.483774	-0.0148386	0.81651	-0.010471	0.869941	0.0155965	0.807316
joint16	HandTipRight	X	The kurtosis of amplitudes	-0.285619	5.07994e-06	0.162436	0.0105598	0.107405	0.0921199	-0.0861228	0.177283	0.122282	0.0549492	-0.0508329	0.426402	-0.024368	0.703139	-0.133011	0.0366972	0.0343268	0.59133	0.10806	0.0901415	0.00779995	0.902926	-0.0494635	0.438984	-0.029804	0.641119	0.0487567	0.445559	-0.00236169	0.970542	-0.0340381	0.594454	0.0188217	0.768505
joint16	HandTipRight	Y	Direct current component	-0.0621428	0.330734	0.125015	0.0497043	-0.150618	0.0178526	-0.133234	0.0363806	0.212663	0.000768574	0.0767652	0.229319	0.0356333	0.577283	-0.012808	0.841261	0.29061	3.40475e-06	0.0320329	0.616363	0.0419448	0.511722	-0.192907	0.0023264	0.103135	0.105882	-0.0976812	0.125755	-0.0241048	0.706196	-0.0308193	0.629791	-0.00253351	0.9684
joint16	HandTipRight	Y	The mean of phases	0.206854	0.00107578	0.170445	0.00725636	-0.0316589	0.620488	0.161733	0.010905	-0.0372375	0.560252	0.105636	0.097638	-0.1915	0.00250762	0.211679	0.000814163	-0.114665	0.0720349	-0.157043	0.0134753	-0.0242819	0.704139	-0.0939629	0.140883	-0.0610577	0.339264	0.0140784	0.825756	0.00284874	0.96447	-0.00223543	0.972116	0.00217528	0.972866
joint16	HandTipRight	Y	The variance of phases	0.134731	0.0343125	0.184018	0.00370528	-0.0313839	0.623528	0.200021	0.00157974	-0.00819133	0.898081	0.00905745	0.887372	-0.214897	0.000673721	0.238688	0.000152393	-0.0906482	0.155506	-0.143533	0.0240678	-0.0260394	0.683836	-0.0274201	0.668043	-0.0546508	0.392447	0.0512892	0.422256	0.0116242	0.855765	0.0135392	0.832329	0.00297821	0.962857
joint16	HandTipRight	Y	The standard deviation of phases	0.112522	0.0775546	0.150541	0.0179111	-0.0161024	0.801194	0.186834	0.00320431	-0.0301561	0.637181	0.0147444	0.817654	-0.239452	0.000144921	0.231388	0.000244456	-0.0847261	0.18444	-0.143731	0.0238712	-0.0126742	0.842898	-0.0258192	0.686368	-0.0536797	0.400925	0.0485488	0.447504	0.0130928	0.83778	0.0159011	0.803629	0.00656854	0.918193
joint16	HandTipRight	Y	The skewness of phases	-0.0147983	0.816999	0.1519	0.0168914	0.0181081	0.777046	0.166473	0.00875779	0.0126446	0.84326	-0.065118	0.30806	-0.134464	0.034674	0.186732	0.00322135	-0.072576	0.255817	-0.101998	0.109804	-0.00484024	0.93967	0.0604978	0.343719	-0.0583391	0.361244	0.0782503	0.220409	0.0051731	0.93553	0.0286427	0.65418	0.0112652	0.860173
joint16	HandTipRight	Y	The kurtosis of phases	0.00351884	0.956121	0.198047	0.00176117	0.0249003	0.69697	0.158958	0.0123677	0.0399233	0.532292	-0.0672592	0.292391	-0.0716945	0.261651	0.162212	0.0106689	-0.0708506	0.267322	-0.0850917	0.182546	-0.014475	0.820929	0.0634697	0.320492	-0.0555955	0.384305	0.0733948	0.250478	-0.00272708	0.965987	0.0254071	0.691115	0.00608316	0.924219
joint16	HandTipRight	Y	The mean of amplitudes	0.444149	2.30357e-13	0.409825	2.01318e-11	-0.225546	0.000353039	-0.0565932	0.375817	0.149106	0.0190467	-0.0598454	0.348958	-0.149231	0.0189454	0.219907	0.000499001	0.114392	0.0727195	-0.0726024	0.255643	0.164489	0.00960589	-0.0441379	0.48988	0.0420456	0.510707	0.0229464	0.719708	-0.0424999	0.506146	0.0261226	0.68288	-0.0305114	0.633217
joint16	HandTipRight	Y	The variance of amplitudes	0.276598	1.02704e-05	0.432435	1.12143e-12	-0.24845	7.915e-05	-0.0580177	0.363899	0.263276	2.77867e-05	-0.138683	0.0293269	-0.115991	0.0687823	0.167218	0.00845646	0.228985	0.000284682	0.0421993	0.509162	0.127997	0.0444627	-0.0319157	0.617654	0.0181529	0.776509	0.00255112	0.96818	-0.0405893	0.52547	-0.0222613	0.727741	0.00359477	0.955175
joint16	HandTipRight	Y	The standard deviation of amplitudes	0.340271	4.1299e-08	0.350816	1.45612e-08	-0.225354	0.00035728	-0.0661379	0.300529	0.190484	0.00264645	-0.120137	0.0593823	-0.107761	0.0910418	0.136706	0.0317383	0.178522	0.00489129	0.0127798	0.841606	0.140959	0.0267479	-0.00777958	0.903178	0.0293199	0.646551	0.0175087	0.784242	-0.0351435	0.582531	0.00546999	0.931838	-0.0173917	0.785648
joint16	HandTipRight	Y	The skewness of amplitudes	-0.366005	3.02796e-09	-0.154853	0.0148474	0.0819184	0.199465	0.176058	0.00552637	0.0311199	0.626453	-0.141571	0.0260882	-0.180842	0.00435434	0.0946027	0.138185	0.0745538	0.243054	0.0837972	0.189316	-0.121792	0.0559375	-0.0420132	0.511033	-0.0297147	0.64212	0.000465282	0.994195	0.0600697	0.347151	0.00388687	0.951536	0.025731	0.687383
joint16	HandTipRight	Y	The kurtosis of amplitudes	-0.344261	2.79647e-08	-0.137155	0.0311757	0.104151	0.102469	0.165244	0.00927502	0.0359273	0.574143	-0.14582	0.0218839	-0.199469	0.0016287	0.111474	0.0803744	0.0708978	0.267003	0.095317	0.13522	-0.125919	0.0480631	-0.0514432	0.420863	-0.0404773	0.526614	-0.00856137	0.893503	0.0618986	0.332641	0.00665771	0.917086	0.0278644	0.662991
joint16	HandTipRight	Z	Direct current component	-0.118028	0.064022	0.214976	0.000670579	0.0398777	0.532761	0.0845635	0.185287	-0.178283	0.00495006	-0.143123	0.0244784	-0.141187	0.0265007	0.0206866	0.746316	0.0561592	0.379494	0.0900333	0.158341	0.0505507	0.428978	-0.234748	0.000197033	0.0988938	0.121104	0.0803253	0.208377	-0.0263892	0.679822	0.144534	0.0230894	-0.0272685	0.66977
joint16	HandTipRight	Z	The mean of phases	0.39072	1.96202e-10	-0.171555	0.00688018	-0.170109	0.00737396	-0.0979785	0.124602	0.156661	0.0137061	0.0240967	0.70629	-0.0407231	0.524104	0.122872	0.05378	-0.00776462	0.903364	0.0767845	0.229202	0.0236823	0.711114	-0.0995798	0.118532	-0.00141637	0.982331	-0.00482137	0.939905	-0.0175323	0.783958	-0.0120634	0.850378	0.0123798	0.846501
joint16	HandTipRight	Z	The variance of phases	0.254136	5.33752e-05	-0.239169	0.000147644	-0.193387	0.00226747	-0.059962	0.348017	0.137261	0.0310449	0.0120872	0.850086	-0.0829261	0.193974	0.150171	0.0181982	-0.0216294	0.735176	0.0592613	0.35369	0.0257636	0.687007	-0.111277	0.0809146	0.0460101	0.471637	-0.0316987	0.620049	-0.0196922	0.758122	-0.0172023	0.787927	0.0209907	0.742717
joint16	HandTipRight	Z	The standard deviation of phases	0.246642	8.95456e-05	-0.256084	4.65352e-05	-0.202646	0.00136496	-0.0531072	0.405974	0.136856	0.031549	0.0204378	0.749265	-0.103026	0.106253	0.17617	0.00549587	-0.0280631	0.660737	0.0621901	0.330365	0.010684	0.867318	-0.111428	0.0804991	0.0368686	0.564147	-0.0390715	0.541084	-0.0398888	0.532647	-0.0114255	0.858204	0.0198274	0.756514
joint16	HandTipRight	Z	The skewness of phases	0.0470113	0.462036	-0.196119	0.00195657	-0.153402	0.015823	-0.0273309	0.669059	0.10085	0.113885	-0.0018896	0.976429	-0.0978053	0.125273	0.139776	0.0280626	-0.0359319	0.574095	0.0189534	0.766931	-0.00199401	0.975126	-0.0925287	0.147076	0.0830824	0.193132	-0.0342886	0.591743	-0.0247057	0.699223	-0.00832096	0.896477	0.0213072	0.738977
joint16	HandTipRight	Z	The kurtosis of phases	0.0339025	0.595925	-0.123243	0.053056	-0.127595	0.0451412	-0.0269288	0.673646	0.101149	0.112809	-0.0153297	0.81055	-0.0603311	0.345053	0.107566	0.0916305	-0.0282202	0.658958	0.0125908	0.843919	0.00771477	0.903981	-0.0695818	0.276005	0.0790896	0.215484	-0.0130383	0.838446	-0.00769861	0.904181	-0.0129242	0.83984	0.0187236	0.769678
joint16	HandTipRight	Z	The mean of amplitudes	0.460875	2.1582e-14	-0.385892	3.40983e-10	-0.258972	3.79003e-05	-0.0578029	0.365681	-0.0607538	0.341677	0.106661	0.0944097	0.0712329	0.264743	0.0108365	0.865443	-0.162665	0.0104496	-0.0406413	0.524939	0.0206676	0.746541	0.0304795	0.633573	-0.0682997	0.284972	0.0136406	0.831092	-0.0163333	0.798404	0.0740126	0.246501	-0.0151444	0.812797
joint16	HandTipRight	Z	The variance of amplitudes	-0.12284	0.053844	-0.251387	6.46488e-05	-0.162107	0.0107204	0.0358385	0.575092	-0.0619664	0.332111	0.105381	0.0984538	0.108825	0.0878735	-0.112351	0.0780072	-0.190394	0.002659	-0.122101	0.0553132	0.0745222	0.243255	0.0249297	0.69663	0.0188054	0.768699	-0.020286	0.751065	-0.0122795	0.84773	-0.0381397	0.550782	0.0327636	0.608339
joint16	HandTipRight	Z	The standard deviation of amplitudes	-0.123887	0.0518161	-0.303425	1.17645e-06	-0.149702	0.0185678	0.0681978	0.285693	-0.0967631	0.129368	0.127187	0.0458377	0.0845224	0.185501	-0.0689888	0.280128	-0.164114	0.00977418	-0.112761	0.0769226	0.023595	0.712131	0.0441184	0.490072	0.0125906	0.843921	-0.0286416	0.654192	-0.0180642	0.777572	0.00206378	0.974257	0.00899165	0.888185
joint16	HandTipRight	Z	The skewness of amplitudes	-0.518531	2.12086e-18	-0.299522	1.63495e-06	0.0352764	0.581105	0.154103	0.0153449	-0.0890459	0.162974	0.093193	0.144182	0.0113608	0.858998	0.0182779	0.775011	-0.0553528	0.386386	-0.0423325	0.507824	-0.059732	0.349873	0.060396	0.344533	0.0300282	0.63861	-0.0649138	0.309583	-0.0463661	0.468211	-0.00440119	0.945133	-0.0159817	0.802654
joint16	HandTipRight	Z	The kurtosis of amplitudes	-0.515538	3.57838e-18	-0.306393	9.13073e-07	0.0412691	0.518551	0.137327	0.0309626	-0.0884149	0.165987	0.103553	0.104468	0.0155969	0.807312	0.0143313	0.822677	-0.0558827	0.381849	-0.0400812	0.530671	-0.052395	0.412308	0.0533873	0.4035	0.0225632	0.724197	-0.0639136	0.317113	-0.049987	0.434149	-0.00995	0.876358	-0.0151481	0.812753
joint1	Head	X	Direct current component	0.129573	0.0418854	-0.337984	5.1513e-08	-0.296384	2.12269e-06	-0.214394	0.000694086	0.0691758	0.278824	-0.168541	0.0079449	0.15559	0.0143727	-0.0785803	0.218463	0.156535	0.0137835	0.100348	0.115705	-0.0710188	0.266185	-0.0982603	0.123517	-0.00225657	0.971853	0.106023	0.0964085	0.04008	0.530683	0.0664445	0.298289	0.00135744	0.983066
joint1	Head	X	The mean of phases	0.0628861	0.324971	-0.265309	2.39515e-05	-0.190244	0.00268021	0.274374	1.21714e-05	0.0675098	0.290592	0.0127518	0.841948	0.00564317	0.929686	-0.035708	0.576485	-0.0382343	0.549794	0.152339	0.0165726	0.0244326	0.702389	0.00745266	0.907228	0.14693	0.0208866	-0.0100014	0.875725	-0.0505854	0.428661	-0.0353385	0.580439	0.0130212	0.838654
joint1	Head	X	The variance of phases	-0.119731	0.0602519	-0.174507	0.0059629	-0.159771	0.0119222	0.149116	0.0190384	0.0535495	0.402071	0.00180116	0.977531	-0.0109288	0.864307	-0.0253172	0.692152	-0.0277713	0.664049	0.137832	0.0303455	0.0197986	0.756857	-0.00489558	0.938981	0.104752	0.10049	-0.0120549	0.850483	-0.0312225	0.625316	-0.0291588	0.648362	0.0119084	0.852278
joint1	Head	X	The standard deviation of phases	-0.138485	0.0295619	-0.210431	0.000875497	-0.147417	0.020462	0.135891	0.0327801	0.0378781	0.55352	0.0239864	0.707573	-0.0180059	0.778272	-0.00581887	0.927502	-0.0298126	0.641023	0.157774	0.0130425	0.00820123	0.897958	-0.00810613	0.899135	0.117812	0.0645139	-0.0193876	0.76175	-0.0284821	0.655994	-0.0176738	0.782257	0.0169592	0.790854
joint1	Head	X	The skewness of phases	-0.248658	7.80317e-05	0.0252498	0.69293	-0.0318499	0.61838	-0.00882659	0.890225	0.0359568	0.573829	0.00231721	0.971096	0.0409717	0.521572	0.00845369	0.894835	-0.0239495	0.708003	0.0847408	0.184363	0.00803351	0.900034	0.00139655	0.982578	0.0290417	0.64968	0.00227837	0.971581	-0.0120959	0.849979	-0.0202006	0.752079	0.00963057	0.880298
joint1	Head	X	The kurtosis of phases	-0.196728	0.00189282	0.0675415	0.290365	-0.0225731	0.724081	0.0196328	0.75883	0.0552155	0.387567	-0.0313581	0.623814	0.066478	0.298044	-0.00265536	0.966881	-0.0238305	0.709388	0.068978	0.280203	0.0202826	0.751105	0.0211428	0.740919	0.0122706	0.847839	0.0111292	0.861844	-0.0219461	0.731446	-0.0282521	0.658596	-0.00261026	0.967443
joint1	Head	X	The mean of amplitudes	0.35015	1.55697e-08	-0.412049	1.52988e-11	-0.35282	1.18911e-08	-0.258134	4.02365e-05	-0.271609	1.50019e-05	-0.143918	0.0236873	0.00158227	0.980261	0.0392082	0.539668	-0.0333812	0.601593	0.0648332	0.310186	-0.0705245	0.269536	-0.0190234	0.766096	-0.0146512	0.818786	-0.0379876	0.552373	-0.0490947	0.442408	0.0490804	0.442541	-0.0473898	0.458434
joint1	Head	X	The variance of amplitudes	0.1088	0.0879476	-0.242719	0.000116653	-0.297983	1.85893e-06	-0.50855	1.1897e-17	-0.308761	7.44424e-07	-0.0818658	0.199755	-0.0711137	0.265545	0.035717	0.576389	-0.0135017	0.832787	-0.0287025	0.653504	-0.0885475	0.16535	-0.0467775	0.464267	-0.0710154	0.266208	0.0081795	0.898227	-0.0207904	0.745087	0.0334444	0.600905	-0.0712528	0.264609
joint1	Head	X	The standard deviation of amplitudes	0.112074	0.0787484	-0.254296	5.27815e-05	-0.29647	2.10762e-06	-0.541724	3.07524e-20	-0.307813	8.07962e-07	-0.0973962	0.126868	-0.0789061	0.216554	0.0478243	0.454319	-0.0290001	0.650149	0.0030457	0.962016	-0.108648	0.088394	-0.0430771	0.500382	-0.0556566	0.383781	-0.0133893	0.834158	-0.015954	0.802989	0.0467159	0.464857	-0.0535271	0.402268
joint1	Head	X	The skewness of amplitudes	-0.489649	2.68131e-16	0.12937	0.0422106	-0.0545797	0.393065	-0.319482	2.88711e-07	-0.00671524	0.916373	0.0624336	0.328471	-0.14511	0.022542	-0.0107119	0.866976	-0.102926	0.106596	-0.0587974	0.357477	-0.0910862	0.153511	-0.0271783	0.670799	0.0580555	0.363586	-0.00151986	0.98104	0.0560476	0.380444	-0.00159216	0.980138	0.0259755	0.68457
joint1	Head	X	The kurtosis of amplitudes	-0.475001	2.63535e-15	0.139681	0.028171	-0.05317	0.405419	-0.319185	2.96522e-07	-0.0138383	0.828682	0.0755345	0.236894	-0.128932	0.0429183	-0.0144884	0.820766	-0.112814	0.0767815	-0.0541049	0.3972	-0.0808055	0.205661	-0.0252901	0.692464	0.0683648	0.284512	0.00481181	0.940024	0.0490941	0.442413	-0.0172698	0.787114	0.0199742	0.754769
joint1	Head	Y	Direct current component	-0.298749	1.74397e-06	-0.0208251	0.744676	-0.0108385	0.865418	-0.189185	0.0028339	-0.056862	0.37355	-0.0357612	0.575916	0.0666086	0.297094	0.0178671	0.779937	0.0237055	0.710843	0.0280535	0.660846	0.0425869	0.505275	0.0362029	0.571209	-0.00842917	0.895138	-0.0400442	0.531051	0.0167513	0.79336	0.0128374	0.840902	0.04507	0.480751
joint1	Head	Y	The mean of phases	-0.0948016	0.137355	0.000598466	0.992534	0.131522	0.0388733	0.212409	0.000780096	-0.0823907	0.196878	0.00376792	0.953018	-0.0153854	0.809874	-0.0307815	0.630211	-0.130905	0.0398062	0.17073	0.00715811	0.159625	0.0120014	-0.0897023	0.159883	-0.104893	0.100031	0.0525415	0.411001	0.0868455	0.173661	-0.0752848	0.238452	0.00482808	0.939821
joint1	Head	Y	The variance of phases	-0.20224	0.00139629	0.0997069	0.118061	0.13784	0.0303354	0.11096	0.0817867	-0.00182653	0.977215	0.0221242	0.729352	-0.012173	0.849035	-0.02339	0.714524	-0.0655006	0.305221	0.124867	0.0499775	0.0953987	0.134884	-0.0475133	0.457263	-0.0725864	0.255748	0.0716984	0.261625	0.0335253	0.600024	-0.0672885	0.29218	0.00566149	0.929458
joint1	Head	Y	The standard deviation of phases	-0.22132	0.000457932	0.082534	0.196097	0.125605	0.0486272	0.122308	0.0548984	-0.00108748	0.986433	0.0520219	0.415649	-0.0332835	0.602658	-0.0255881	0.689029	-0.062335	0.329238	0.131457	0.0389708	0.0913524	0.152308	-0.0765607	0.230566	-0.0682682	0.285194	0.0652398	0.307155	0.0511768	0.423275	-0.0710171	0.266197	0.00778155	0.903154
joint1	Head	Y	The skewness of phases	-0.215703	0.000642263	0.178522	0.00489131	0.0963274	0.13111	-0.00832764	0.896394	0.0576133	0.367259	-0.00110513	0.986213	0.0256831	0.687935	-0.0189297	0.767214	-0.0104454	0.870256	0.0594028	0.35254	0.0380951	0.551248	0.0306244	0.63196	-0.022704	0.722547	0.0557385	0.383081	-0.0138845	0.828118	-0.0308426	0.629532	0.00505789	0.936962
joint1	Head	Y	The kurtosis of phases	-0.179273	0.0047114	0.187217	0.0031411	0.106213	0.09581	0.0175692	0.783515	0.057029	0.372146	-0.0327608	0.60837	0.0531142	0.405913	-0.0216626	0.734785	-0.023051	0.718484	0.0627972	0.325657	0.0468745	0.463341	0.0458989	0.472709	-0.0420259	0.510905	0.0585945	0.359141	-0.0135493	0.832206	-0.0360583	0.572748	0.000608525	0.992408
joint1	Head	Y	The mean of amplitudes	0.603897	6.14548e-26	0.0629332	0.324608	0.19268	0.0023549	-0.0504428	0.429964	-0.0838377	0.189101	0.385703	3.48402e-10	-0.0493101	0.440406	0.00270552	0.966256	-0.123112	0.0533104	0.121448	0.0566384	-0.133302	0.0362843	-0.00492607	0.938602	0.0335943	0.599273	0.0250153	0.69564	0.0297262	0.641991	-0.00471407	0.94124	-0.00538188	0.932934
joint1	Head	Y	The variance of amplitudes	0.501583	3.836e-17	0.0940077	0.140692	0.186538	0.00325382	-0.103058	0.106143	0.0144897	0.82075	0.467246	8.46041e-15	-0.121287	0.0569703	-0.00733752	0.908655	-0.0894508	0.161062	0.0990239	0.120613	-0.205807	0.00114193	0.022134	0.729237	0.0214263	0.737571	0.0538354	0.399559	-0.0531601	0.405507	-0.00761418	0.905227	-0.0222815	0.727504
joint1	Head	Y	The standard deviation of amplitudes	0.565191	3.00016e-22	0.105223	0.0989624	0.196246	0.00194313	-0.104223	0.102231	0.00504239	0.937155	0.452919	6.76433e-14	-0.0952789	0.135377	0.00658505	0.917988	-0.0530252	0.406701	0.0540711	0.397496	-0.18954	0.00278161	0.0188948	0.767631	0.0379159	0.553124	0.0445071	0.486252	-0.00507221	0.936784	0.00716302	0.910819	-0.00933106	0.883994
joint1	Head	Y	The skewness of amplitudes	-0.209505	0.000923769	0.0260399	0.68383	-0.00690643	0.914001	-0.114924	0.0713907	0.185051	0.0035137	0.231731	0.000239157	-0.0904195	0.156556	0.00208629	0.973976	0.259614	3.61978e-05	-0.0400765	0.53072	-0.162556	0.0105017	0.0598761	0.34871	-0.0220336	0.730417	-0.0271882	0.670686	-0.0808138	0.205614	-0.065292	0.306767	-0.00391756	0.951154
joint1	Head	Y	The kurtosis of amplitudes	-0.198374	0.0017299	0.00634495	0.920968	-0.000640962	0.992003	-0.127869	0.0446782	0.166204	0.00886849	0.23849	0.000154397	-0.085719	0.179331	-0.000808191	0.989917	0.266292	2.22832e-05	-0.0210477	0.742043	-0.148963	0.0191626	0.0796079	0.212482	-0.0206042	0.747293	-0.0468126	0.463932	-0.0805832	0.206915	-0.0726629	0.255246	6.5986e-05	0.999177
joint1	Head	Z	Direct current component	0.156582	0.0137546	-0.077521	0.224753	0.552779	3.63398e-21	-0.120238	0.0591675	-0.118652	0.0626191	-0.320503	2.6328e-07	-0.0533547	0.403788	0.0758473	0.234952	-0.0142594	0.823552	-0.0889442	0.163456	0.0296297	0.643073	0.0372617	0.559997	0.0726356	0.255425	0.00629718	0.921562	-0.0370855	0.561856	0.0174819	0.784564	-0.0107405	0.866623
joint1	Head	Z	The mean of phases	0.0515311	0.420068	-0.183383	0.00382759	0.0905054	0.156162	0.270187	1.66894e-05	-0.13138	0.0390865	0.239734	0.000142251	0.254831	5.08336e-05	0.336823	5.75957e-08	0.121517	0.056497	0.083018	0.193478	-0.0261581	0.682473	0.0337949	0.597093	-0.0607638	0.341598	0.0768431	0.228845	0.030146	0.637294	-0.0373373	0.5592	0.0280297	0.661116
joint1	Head	Z	The variance of phases	-0.0392659	0.53907	-0.10382	0.103572	0.0596706	0.35037	0.191726	0.00247778	-0.0790651	0.215626	0.174445	0.00598104	0.293304	2.73458e-06	0.302328	1.29108e-06	0.114072	0.0735285	0.0811643	0.203648	0.0159231	0.803362	0.0286105	0.654543	-0.0799032	0.210785	0.0346614	0.587718	0.0199036	0.755608	-0.0391172	0.54061	0.0524277	0.412017
joint1	Head	Z	The standard deviation of phases	-0.0593036	0.353346	-0.123119	0.0532971	0.0441572	0.48969	0.194091	0.00218329	-0.0701712	0.271948	0.191644	0.00248854	0.272287	1.42546e-05	0.301214	1.41842e-06	0.123275	0.0529927	0.0941118	0.140251	0.00842138	0.895235	0.0186371	0.770711	-0.0931098	0.144542	0.0315019	0.622223	0.0186331	0.77076	-0.0292505	0.64733	0.0574128	0.368931
joint1	Head	Z	The skewness of phases	-0.151995	0.0168218	0.0571829	0.370855	0.0607801	0.341468	0.0751493	0.2393	0.0148549	0.816311	0.0279062	0.662517	0.24671	8.9132e-05	0.173467	0.00627274	0.0508704	0.426061	0.0523337	0.412856	0.0403447	0.52797	0.0436122	0.49507	-0.0849509	0.183274	-0.00623219	0.922369	-0.0197139	0.757864	-0.0383417	0.548672	0.0600244	0.347516
joint1	Head	Z	The kurtosis of phases	-0.122541	0.0544334	0.0930605	0.144756	0.0754412	0.237475	0.0725931	0.255704	0.0185437	0.771829	-0.00418844	0.947782	0.24147	0.00012679	0.149459	0.0187619	0.0426349	0.504795	0.0330915	0.604754	0.0454525	0.477031	0.0514325	0.420959	-0.0800888	0.209724	-0.00135337	0.983116	-0.0208484	0.7444	-0.0335015	0.600283	0.0382934	0.549176
joint1	Head	Z	The mean of amplitudes	0.459685	2.56505e-14	-0.182643	0.00397461	0.0196965	0.758072	-0.065391	0.306032	-0.289206	3.81314e-06	0.0952497	0.135498	0.193695	0.00223023	0.261426	3.17735e-05	0.184164	0.00367756	-0.0403899	0.527508	0.0351867	0.582067	0.131057	0.0395746	-0.0733736	0.250615	-0.00733625	0.908671	0.01965	0.758625	0.0689607	0.280325	-0.00881108	0.890416
joint1	Head	Z	The variance of amplitudes	0.297442	1.94456e-06	-0.00432931	0.946028	-0.0316007	0.621131	-0.226296	0.000336957	-0.216343	0.000618244	-0.012031	0.850775	0.112961	0.0763971	0.025744	0.687233	0.175858	0.00558083	-0.124956	0.0498133	0.0788553	0.216851	0.0646109	0.311851	-0.0380718	0.551492	-0.0728316	0.254142	-0.00148043	0.981532	0.0617197	0.334043	-0.0174757	0.784638
joint1	Head	Z	The standard deviation of amplitudes	0.286864	4.60063e-06	-0.00472976	0.941044	-0.0467263	0.464758	-0.268586	1.88052e-05	-0.194746	0.00210753	-0.0138717	0.828274	0.0771703	0.226864	0.0130555	0.838235	0.183153	0.00387277	-0.0820009	0.199012	0.0458793	0.472899	0.0777042	0.223656	-0.0494548	0.439064	-0.0626736	0.326612	-0.00457225	0.943004	0.0951813	0.13578	0.00624675	0.922188
joint1	Head	Z	The skewness of amplitudes	-0.305917	9.51135e-07	0.312704	5.27694e-07	-0.0528893	0.407906	-0.100099	0.116614	0.0433315	0.497853	-0.00576497	0.928172	-0.0779347	0.222281	-0.338377	4.96018e-08	-0.00981884	0.877975	-0.0695205	0.276429	-0.135226	0.0336514	-0.0464297	0.467599	0.0448353	0.483041	0.0606998	0.342108	-0.0218297	0.732816	0.0258041	0.686541	-0.036862	0.564217
joint1	Head	Z	The kurtosis of amplitudes	-0.241345	0.000127849	0.322542	2.18818e-07	-0.0337131	0.597982	-0.0817088	0.200622	0.0167003	0.793974	0.0146098	0.81929	-0.064334	0.313933	-0.333572	7.85173e-08	-0.00512888	0.93608	-0.070739	0.268078	-0.148516	0.0195308	-0.00837466	0.895813	0.0221213	0.729386	0.0764514	0.231234	-0.0127847	0.841546	0.0200344	0.754053	-0.0475415	0.456995
joint18	HipLeft	X	Direct current component	-0.321064	2.50251e-07	-0.167914	0.00818396	-0.030908	0.628805	-0.285885	4.97381e-06	-0.0861468	0.177162	-0.0189476	0.767	0.0771469	0.227005	-0.120451	0.0587154	0.0447476	0.483898	0.124403	0.0508412	-0.0263043	0.680795	0.030006	0.638859	0.0396603	0.534999	-0.000581152	0.99275	0.0457732	0.473925	0.0259393	0.684986	0.00277972	0.965331
joint18	HipLeft	X	The mean of phases	-0.140948	0.0267593	0.15669	0.0136886	0.13334	0.0362305	-0.333419	7.96643e-08	0.076393	0.231591	0.173932	0.00613256	0.175386	0.00571197	-0.0414178	0.517044	0.0694646	0.276817	0.133958	0.0353668	0.112672	0.0771575	-0.073986	0.246672	0.109961	0.0845935	-0.0867297	0.174238	0.0861199	0.177297	0.122641	0.0542347	-0.0664425	0.298304
joint18	HipLeft	X	The variance of phases	-0.237849	0.000161025	0.16223	0.0106601	0.133811	0.0355708	-0.229792	0.000270517	0.0785476	0.218655	0.127606	0.0451227	0.097754	0.125472	-0.0557698	0.382814	0.0560745	0.380215	0.0778136	0.223003	0.144453	0.0231675	-0.0169304	0.791201	0.0158148	0.804673	-0.112621	0.0772904	0.0523765	0.412474	0.106022	0.0964121	-0.0629644	0.324367
joint18	HipLeft	X	The standard deviation of phases	-0.243512	0.000110621	0.155649	0.0143351	0.125149	0.049458	-0.231827	0.000237707	0.0844087	0.186096	0.141941	0.0256964	0.0804589	0.207619	-0.0447805	0.483576	0.0781225	0.221166	0.0659141	0.302171	0.133249	0.0363594	-0.0293908	0.645754	0.0186069	0.771072	-0.128657	0.043368	0.0697911	0.27456	0.121078	0.0574025	-0.064604	0.311903
joint18	HipLeft	X	The skewness of phases	-0.250223	7.00683e-05	0.148428	0.0196045	0.105252	0.0988696	-0.113182	0.0758194	0.0642327	0.314697	-0.00729392	0.909196	0.0475432	0.456979	-0.0585339	0.35964	0.0529658	0.407228	0.00863536	0.892589	0.117102	0.0661519	0.0548606	0.39063	-0.0685781	0.283008	-0.0700938	0.272478	0.0184335	0.773147	0.0551756	0.387911	-0.0506276	0.428275
joint18	HipLeft	X	The kurtosis of phases	-0.212469	0.000777361	0.164476	0.00961176	0.115615	0.0696916	-0.105655	0.0975769	0.0578515	0.365277	-0.0246021	0.700423	0.0826615	0.195405	-0.0584346	0.360457	0.0280568	0.660808	0.0198987	0.755666	0.115409	0.0701953	0.0580942	0.363266	-0.0498754	0.435177	-0.0497014	0.436783	-0.000130028	0.998378	0.047056	0.461609	-0.0504344	0.430041
joint18	HipLeft	X	The mean of amplitudes	0.46412	1.34279e-14	0.0655281	0.305017	-0.0428235	0.50291	-0.121458	0.0566182	0.219514	0.000511007	0.198843	0.00168582	-0.066977	0.294425	0.00599888	0.925266	-0.0436574	0.494623	0.0782842	0.220209	0.000452083	0.99436	0.0204215	0.749457	0.107034	0.0932567	0.060983	0.339856	-0.0410575	0.5207	0.107991	0.0903506	0.00457931	0.942916
joint18	HipLeft	X	The variance of amplitudes	0.373239	1.39174e-09	0.082321	0.197258	-0.0284945	0.655854	-0.0772179	0.226576	0.22041	0.000484002	0.167286	0.00842952	-0.137187	0.0311361	0.00657379	0.918128	0.0358609	0.574852	0.101694	0.110874	-0.0656745	0.303935	0.101508	0.111534	0.0334139	0.601237	0.157436	0.0132411	-0.115897	0.0690105	0.0567232	0.37472	0.060773	0.341525
joint18	HipLeft	X	The standard deviation of amplitudes	0.469897	5.69766e-15	0.0242918	0.704024	-0.0639217	0.317051	-0.019581	0.759446	0.200317	0.00155403	0.157424	0.0132479	-0.118152	0.0637419	0.0193834	0.761801	-0.0363103	0.570066	0.0435023	0.496159	-0.0380379	0.551847	0.0792677	0.214449	0.0313009	0.624447	0.0667936	0.295752	-0.0552439	0.387323	0.0561681	0.379419	0.0349707	0.584387
joint18	HipLeft	X	The skewness of amplitudes	-0.115689	0.0695136	-0.0187443	0.76943	0.0177879	0.780888	0.323406	2.02227e-07	-0.0553287	0.386594	-0.0683374	0.284705	-0.228623	0.00029124	0.0249139	0.696812	-0.0524284	0.41201	-0.205175	0.00118365	-0.00625854	0.922041	0.0920048	0.149389	-0.25355	5.56094e-05	-0.144159	0.023452	-0.0840362	0.188053	-0.0196126	0.75907	0.120639	0.0583179
joint18	HipLeft	X	The kurtosis of amplitudes	-0.0872391	0.171712	-0.0147926	0.817068	0.0318807	0.618041	0.306073	9.38506e-07	-0.0737198	0.24838	-0.0808399	0.205467	-0.225707	0.000349542	0.0353597	0.580212	-0.0298946	0.640106	-0.205664	0.00115128	-0.0117158	0.85464	0.098304	0.123349	-0.255186	4.95803e-05	-0.141062	0.026636	-0.0784027	0.219509	-0.0263934	0.679773	0.109553	0.0857598
joint18	HipLeft	Y	Direct current component	0.245966	9.37481e-05	-0.101146	0.11282	0.465248	1.13723e-14	-0.175859	0.00558066	0.047171	0.460514	-0.447115	1.52785e-13	-0.0323356	0.613033	0.0868529	0.173625	-0.0318751	0.618102	0.0115347	0.856864	-0.00175771	0.978073	-0.0047395	0.940923	-0.0585301	0.359671	0.002394	0.970139	0.0817771	0.200245	-0.01172	0.85459	0.00863382	0.892608
joint18	HipLeft	Y	The mean of phases	0.0482096	0.450688	-0.261975	3.05361e-05	-0.135935	0.0327225	0.0577429	0.36618	0.191962	0.00244674	0.00982364	0.877916	0.0144398	0.821357	-0.0558147	0.382429	-0.0831921	0.192543	-0.118675	0.0625679	0.203964	0.00126752	0.119277	0.0612383	0.0552559	0.38722	0.021335	0.738649	-0.036159	0.571676	0.0792577	0.214507	-0.0297769	0.641423
joint18	HipLeft	Y	The variance of phases	-0.0721198	0.258825	-0.247409	8.49896e-05	-0.122288	0.0549373	-0.0492635	0.440839	0.139319	0.0285856	-0.0823048	0.197347	-0.0286224	0.654408	-0.0569957	0.372426	-0.0567287	0.374673	-0.105726	0.0973495	0.125275	0.0492269	0.147986	0.019975	0.0814142	0.202255	-0.0375157	0.557323	-0.116557	0.0674327	0.0864342	0.175716	-0.0359647	0.573745
joint18	HipLeft	Y	The standard deviation of phases	-0.102443	0.108258	-0.251079	6.60454e-05	-0.106018	0.0964257	-0.0519804	0.416022	0.127003	0.0461559	-0.0654156	0.30585	-0.030753	0.630528	-0.053392	0.403458	-0.0537011	0.400738	-0.109758	0.0851704	0.129551	0.041921	0.14422	0.023393	0.0797583	0.211616	-0.0463768	0.468107	-0.115406	0.0702015	0.0982502	0.123556	-0.0428898	0.502249
joint18	HipLeft	Y	The skewness of phases	-0.202175	0.00140139	-0.113445	0.0751365	-0.0320014	0.61671	-0.0920769	0.149069	0.0588945	0.356682	-0.132374	0.0376146	-0.0162537	0.799366	-0.0718185	0.260825	-0.0203619	0.750164	-0.0933772	0.143387	0.0561221	0.37981	0.145195	0.0224631	0.0498624	0.435297	-0.0831155	0.192954	-0.139622	0.0282382	0.0561832	0.379291	-0.0273793	0.668507
joint18	HipLeft	Y	The kurtosis of phases	-0.16535	0.00922942	-0.0575448	0.367829	-0.0270245	0.672553	-0.0746239	0.24261	0.0795495	0.212818	-0.145886	0.0218236	0.0174568	0.784866	-0.0723036	0.25761	-0.0243717	0.703096	-0.0851667	0.18216	0.055661	0.383744	0.133981	0.0353353	0.0275043	0.667085	-0.0580368	0.363741	-0.122324	0.0548661	0.0403196	0.528227	-0.0251945	0.693569
joint18	HipLeft	Y	The mean of amplitudes	0.479486	1.32424e-15	0.0296216	0.643164	-0.264722	2.50041e-05	-0.228058	0.000301772	0.075485	0.237202	-0.122946	0.0536352	-0.0835012	0.19089	0.29737	1.95619e-06	-0.00405916	0.949391	-0.17009	0.00738045	0.246758	8.8842e-05	0.0543761	0.394835	0.0119289	0.852027	0.0223552	0.726639	0.0526205	0.410297	-0.0138336	0.828738	0.021532	0.736325
joint18	HipLeft	Y	The variance of amplitudes	0.313246	5.03148e-07	0.135547	0.0332277	-0.172835	0.00646808	-0.30073	1.47736e-06	-0.00329734	0.95888	-0.127244	0.0457407	-0.108913	0.0876181	0.339728	4.35335e-08	0.0695601	0.276155	-0.137347	0.0309383	0.168801	0.00784731	0.0349242	0.584887	0.0152549	0.811456	0.00345355	0.956934	0.0659135	0.302175	-0.0547462	0.391621	0.0307051	0.631061
joint18	HipLeft	Y	The standard deviation of amplitudes	0.299894	1.58482e-06	0.0750083	0.240185	-0.168909	0.00780747	-0.384874	3.82719e-10	-0.0624285	0.328511	-0.174912	0.00584613	-0.0694956	0.276602	0.269407	1.76901e-05	0.0926394	0.146591	-0.0197016	0.758011	0.0383674	0.548404	0.0353761	0.580036	0.0397717	0.533852	-0.038472	0.547313	0.0323086	0.61333	-0.0595483	0.35136	0.055118	0.388407
joint18	HipLeft	Y	The skewness of amplitudes	-0.459689	2.56359e-14	0.102365	0.108526	0.04218	0.509356	-0.318103	3.26799e-07	0.0232757	0.715858	-0.0489142	0.44409	-0.0732641	0.251325	0.0308878	0.62903	0.0697469	0.274865	0.109688	0.0853716	-0.1217	0.0561252	0.03284	0.607502	0.161087	0.0112313	-0.0782271	0.220546	-0.107419	0.0920777	-0.0326674	0.609393	0.00154545	0.980721
joint18	HipLeft	Y	The kurtosis of amplitudes	-0.475413	2.47515e-15	0.126696	0.0466902	0.0502759	0.431494	-0.321275	2.45522e-07	0.0336809	0.598331	-0.0381878	0.550279	-0.0566722	0.37515	0.0255326	0.689668	0.0608825	0.340654	0.0936771	0.142101	-0.104793	0.100357	0.0385617	0.546379	0.168725	0.00787565	-0.0742632	0.244901	-0.0967535	0.129406	-0.0306926	0.631201	0.00108893	0.986415
joint18	HipLeft	Z	Direct current component	-0.0255502	0.689465	-0.129425	0.0421224	-0.0282886	0.658183	-0.1655	0.00916512	0.295849	2.21862e-06	-0.0421306	0.509852	0.166505	0.00874439	-0.0484582	0.448353	-0.159161	0.012255	0.0895331	0.160675	-0.00769564	0.904218	0.247801	8.2745e-05	-0.0285471	0.65526	-0.0218046	0.733113	0.0146311	0.81903	-0.046022	0.471522	0.0191511	0.764571
joint18	HipLeft	Z	The mean of phases	-0.13539	0.0334336	-0.147752	0.0201745	-0.302771	1.2436e-06	0.122638	0.0542416	0.152656	0.0163458	0.132614	0.0372665	-0.161182	0.0111827	0.0831656	0.192685	0.106042	0.0963486	0.151245	0.0173765	0.0572876	0.369978	0.116887	0.0666543	-0.052227	0.413811	0.0646576	0.3115	0.0595096	0.351673	0.019275	0.763093	-0.0347694	0.586554
joint18	HipLeft	Z	The variance of phases	-0.22858	0.000292034	-0.17965	0.00462325	-0.26149	3.16257e-05	0.0759552	0.234285	0.0770635	0.227509	0.113847	0.0741034	-0.167534	0.00833166	-0.017243	0.787437	0.0882471	0.166795	0.124755	0.0501835	0.106778	0.0940464	0.0565339	0.376318	-0.0304592	0.633799	0.0606711	0.342336	0.0168453	0.792227	0.00227021	0.971683	-0.0222276	0.728137
joint18	HipLeft	Z	The standard deviation of phases	-0.233666	0.000211266	-0.198851	0.00168513	-0.268984	1.82569e-05	0.0960667	0.132161	0.0857591	0.179126	0.142611	0.0249999	-0.164705	0.00951044	-0.00133059	0.983401	0.0980952	0.124152	0.131329	0.0391627	0.102303	0.108741	0.0577462	0.366153	-0.0365181	0.56786	0.0510914	0.42405	0.0263719	0.680019	0.0124864	0.845196	-0.0190836	0.765377
joint18	HipLeft	Z	The skewness of phases	-0.274443	1.21077e-05	-0.127148	0.0459058	-0.115836	0.0691574	-0.028628	0.654346	-0.0321538	0.615032	0.0817994	0.200122	-0.0891927	0.162278	-0.0940912	0.140339	0.0701031	0.272414	0.0427853	0.503292	0.143942	0.0236632	0.0026165	0.967365	-0.00371836	0.953635	0.0474081	0.458261	0.00634776	0.920934	-0.00764733	0.904816	0.0065799	0.918052
joint18	HipLeft	Z	The kurtosis of phases	-0.250887	6.69269e-05	-0.0872044	0.171884	-0.0997915	0.117747	-0.0373934	0.55861	-0.0235114	0.713106	0.0479451	0.453179	-0.0726448	0.255365	-0.0933636	0.143446	0.0635006	0.320256	0.0319835	0.616907	0.140059	0.0277439	0.0169719	0.790701	-0.0102147	0.873096	0.0593389	0.353059	0.00395131	0.950734	-0.0170549	0.789701	-0.00222627	0.97223
joint18	HipLeft	Z	The mean of amplitudes	0.41356	1.26792e-11	-0.374953	1.15442e-09	-0.383862	4.29056e-10	0.191242	0.00254231	0.0371251	0.561437	-0.138973	0.028987	-0.189582	0.00277537	0.0548833	0.390434	-0.029692	0.642374	0.0639313	0.316979	-0.0602971	0.345325	0.0795673	0.212716	-0.0631528	0.322919	-0.121059	0.0574426	0.0656098	0.304413	-0.0331885	0.603694	-0.0469026	0.463073
joint18	HipLeft	Z	The variance of amplitudes	0.361842	4.69496e-09	-0.271102	1.55842e-05	-0.22406	0.000387081	0.122288	0.054937	-0.113047	0.0761697	-0.173438	0.00628171	-0.113122	0.0759738	-0.0424837	0.506308	-0.0756673	0.236068	-0.00462184	0.942387	-0.0650383	0.308654	-0.0391049	0.540738	-0.0233707	0.714748	-0.147288	0.0205739	0.0616762	0.334384	0.00290803	0.963731	-0.0539068	0.398934
joint18	HipLeft	Z	The standard deviation of amplitudes	0.394633	1.24542e-10	-0.315604	4.08417e-07	-0.211657	0.000815188	0.140841	0.026876	-0.0814103	0.202277	-0.194888	0.00209151	-0.138817	0.0291697	-0.0314786	0.622481	-0.0921279	0.148843	-0.0168385	0.792308	-0.0554634	0.385437	-0.0432165	0.498996	-0.0160807	0.801457	-0.152571	0.0164066	0.0310099	0.627674	-0.034466	0.589826	-0.0277085	0.664762
joint18	HipLeft	Z	The skewness of amplitudes	-0.365871	3.07131e-09	0.0167111	0.793844	0.256263	4.59515e-05	-0.119389	0.0609955	-0.0382971	0.549138	0.0258828	0.685635	0.102591	0.107746	-0.125742	0.0483811	-0.114525	0.0723849	-0.169747	0.00750243	0.0421494	0.509663	-0.240112	0.000138741	0.108672	0.088324	0.0101938	0.873354	-0.108759	0.0880683	-0.0286242	0.654388	0.0858056	0.17889
joint18	HipLeft	Z	The kurtosis of amplitudes	-0.365444	3.21355e-09	0.0295929	0.643485	0.263746	2.6852e-05	-0.13552	0.0332632	-0.0129395	0.839654	0.0242444	0.704574	0.126679	0.0467195	-0.0861139	0.177328	-0.100413	0.115468	-0.178894	0.00480149	0.0466706	0.465291	-0.21129	0.00083283	0.117537	0.0651439	0.0307267	0.630821	-0.0873177	0.171325	-0.0277921	0.663812	0.0915786	0.151291
joint19	HipRight	X	Direct current component	-0.376084	1.01977e-09	-0.132828	0.0369594	0.0327914	0.608035	-0.24397	0.000107271	-0.0390087	0.541735	-0.0433328	0.497839	0.0849537	0.183259	-0.0650956	0.308227	0.00396208	0.9506	0.115025	0.07114	-0.0365825	0.567177	0.0804316	0.207773	-0.020355	0.750247	-0.00871446	0.891611	0.00969661	0.879483	0.00773422	0.90374	-0.0109476	0.864076
joint19	HipRight	X	The mean of phases	0.00546489	0.931902	-0.0452701	0.478803	0.0497515	0.43632	-0.0803899	0.20801	-0.0582926	0.361627	0.104503	0.101306	0.0478391	0.454179	-0.0944959	0.138633	-0.0356341	0.577274	0.0848548	0.183771	0.115434	0.0701346	-0.125347	0.0490959	0.175601	0.005652	0.0159698	0.802798	-0.122429	0.0546572	0.0492156	0.441284	0.155141	0.0146604
joint19	HipRight	X	The variance of phases	-0.013004	0.838865	-0.0625521	0.327552	0.0767581	0.229363	-0.1224	0.0547144	-0.02304	0.718614	0.0714886	0.263027	0.077431	0.225294	-0.0580756	0.36342	-0.0745655	0.24298	0.115271	0.0705344	0.118603	0.062728	-0.0915731	0.151316	0.0672555	0.292417	-0.0717244	0.261452	-0.121206	0.0571368	0.0347241	0.587042	0.0862098	0.176844
joint19	HipRight	X	The standard deviation of phases	-0.0102095	0.873161	-0.0587601	0.357783	0.0580419	0.363699	-0.128422	0.0437546	-0.0268562	0.674476	0.0859077	0.178372	0.0715814	0.262407	-0.0375083	0.557402	-0.0682068	0.285629	0.110741	0.0823962	0.118761	0.0623763	-0.0991297	0.120215	0.0680562	0.286696	-0.0617418	0.33387	-0.12355	0.0524606	0.0332626	0.602885	0.0849043	0.183515
joint19	HipRight	X	The skewness of phases	-0.121572	0.0563862	0.0595385	0.351439	0.0889009	0.163662	-0.135085	0.0338384	0.014099	0.825505	-0.0120002	0.851153	0.103725	0.103888	-0.0184308	0.773181	-0.071147	0.26532	0.102647	0.107552	0.0894545	0.161044	-0.0355381	0.578302	-0.0662569	0.299658	-0.0898398	0.159241	-0.0843368	0.186472	-0.025586	0.689052	-0.00572375	0.928684
joint19	HipRight	X	The kurtosis of phases	-0.0981028	0.124123	0.0807162	0.206164	0.100349	0.115698	-0.10786	0.0907431	0.0188886	0.767705	-0.0308774	0.629146	0.118693	0.0625289	-0.0358087	0.575409	-0.0764604	0.231179	0.102411	0.108366	0.0862668	0.176557	-0.0257932	0.686666	-0.0464617	0.467292	-0.0775183	0.22477	-0.090264	0.157273	-0.0120468	0.850581	-0.00257585	0.967872
joint19	HipRight	X	The mean of amplitudes	0.690493	2.53913e-36	-0.0469805	0.46233	-0.0761972	0.232793	-0.128389	0.04381	0.156116	0.0140422	0.130351	0.0406597	0.0414338	0.516883	-0.0528602	0.408164	-0.179064	0.0047609	0.182886	0.00392573	-0.011372	0.858861	0.0410636	0.520638	0.0573425	0.369519	0.0461674	0.470121	-0.0635653	0.319762	0.0622258	0.330087	0.00335926	0.958109
joint19	HipRight	X	The variance of amplitudes	0.486327	4.54617e-16	0.0269904	0.672942	-0.0220112	0.730681	-0.123344	0.0528586	0.207236	0.00105255	0.193225	0.00228724	-0.0440253	0.49099	-0.0375276	0.557198	-0.106651	0.0944407	0.197971	0.00176848	-0.0963516	0.131013	0.088374	0.166184	-0.0232541	0.71611	0.0995387	0.118685	-0.108007	0.0903017	0.043686	0.494339	0.0142333	0.823869
joint19	HipRight	X	The standard deviation of amplitudes	0.646253	1.34822e-30	-0.0604791	0.343869	-0.0562632	0.378612	-0.100787	0.114109	0.209529	0.000922497	0.137858	0.030314	0.0316776	0.620282	-0.0112567	0.860278	-0.15627	0.0139465	0.176521	0.00540171	-0.0550772	0.388759	0.0805326	0.207201	-0.0318843	0.618001	0.0215699	0.735878	-0.0276743	0.665151	0.0381676	0.55049	-0.0113863	0.858685
joint19	HipRight	X	The skewness of amplitudes	0.0308914	0.62899	-0.164399	0.00964639	0.0356983	0.576588	0.0145997	0.819412	0.103919	0.103241	-0.019019	0.766148	-0.02668	0.67649	0.115897	0.0690093	-0.0563385	0.377973	-0.0526033	0.41045	-0.0479183	0.453432	0.116402	0.0677996	-0.196101	0.0019585	-0.181684	0.00417299	0.0430974	0.50018	0.0701001	0.272436	-0.0470826	0.461356
joint19	HipRight	X	The kurtosis of amplitudes	0.0318499	0.61838	-0.147996	0.019967	0.0405341	0.526033	0.0305051	0.633287	0.0922147	0.148459	-0.02537	0.691543	-0.0578708	0.365118	0.121485	0.0565641	-0.0339791	0.595094	-0.0548679	0.390567	-0.053832	0.399589	0.106821	0.0939143	-0.200165	0.0015672	-0.178697	0.00484897	0.0305487	0.632802	0.0592739	0.353588	-0.028672	0.653849
joint19	HipRight	Y	Direct current component	0.128526	0.0435834	-0.170178	0.00734956	0.193236	0.00228589	-0.0532927	0.404335	-0.0657947	0.303049	-0.2988	1.73668e-06	-0.1127	0.0770816	0.199405	0.00163448	-0.0349272	0.584856	-0.134926	0.03405	0.156028	0.0140965	-0.0308783	0.629136	-0.0509859	0.42501	-0.00583107	0.927351	-0.0623167	0.32938	0.128031	0.0444053	0.04127	0.518542
joint19	HipRight	Y	The mean of phases	0.184621	0.00359231	-0.227679	0.000309048	-0.177381	0.00517669	0.16655	0.008726	0.108347	0.0892861	0.0216953	0.7344	-0.0184063	0.773474	-0.0128596	0.840629	-0.0840428	0.188018	-0.0520644	0.415268	0.223829	0.000392636	0.12863	0.0434127	0.0475883	0.456552	0.122665	0.0541882	0.131866	0.0383607	0.0524639	0.411693	-0.00535149	0.933311
joint19	HipRight	Y	The variance of phases	0.078618	0.218241	-0.201148	0.00148398	-0.179253	0.00471598	0.0866406	0.174682	0.080868	0.205309	-0.0655274	0.305022	-0.0967886	0.129267	-0.00542211	0.932433	-0.0863943	0.175916	-0.0348046	0.586174	0.18199	0.00410872	0.156552	0.0137726	0.0891926	0.162279	0.0727055	0.254967	0.092854	0.145653	0.021017	0.742406	-0.0182468	0.775384
joint19	HipRight	Y	The standard deviation of phases	0.0530537	0.406448	-0.215279	0.000658631	-0.171281	0.00697146	0.0804055	0.207921	0.0796282	0.212365	-0.0652176	0.307319	-0.123031	0.0534678	-0.0138281	0.828805	-0.0939221	0.141056	-0.0231138	0.71775	0.193727	0.00222643	0.152607	0.016381	0.0810591	0.204237	0.0627574	0.325964	0.10734	0.092319	0.0296653	0.642673	-0.026582	0.677613
joint19	HipRight	Y	The skewness of phases	-0.0781693	0.220888	-0.10556	0.0978816	-0.10904	0.0872456	0.011008	0.863334	0.0590938	0.355055	-0.124667	0.0503471	-0.100939	0.113565	-0.0210277	0.742279	-0.0682492	0.285329	-0.0127962	0.841405	0.13618	0.0324074	0.147332	0.0205356	0.0819618	0.199227	0.0188196	0.768529	0.0648265	0.310235	-0.0262608	0.681294	-0.0300665	0.638182
joint19	HipRight	Y	The kurtosis of phases	-0.0494883	0.438754	-0.0520925	0.415016	-0.099105	0.120308	0.0193461	0.762245	0.0743001	0.244666	-0.126649	0.046772	-0.0442364	0.488911	-0.0134915	0.832911	-0.0637613	0.318269	-0.0176587	0.782439	0.116441	0.0677069	0.138897	0.0290759	0.0669978	0.294274	0.0330172	0.605565	0.0563688	0.377716	-0.0324616	0.61165	-0.0210401	0.742133
joint19	HipRight	Y	The mean of amplitudes	0.500978	4.24153e-17	0.0927586	0.146069	-0.241493	0.000126591	-0.197347	0.00183	0.0402928	0.528501	-0.0905999	0.155728	-0.123573	0.0524174	0.296956	2.02452e-06	0.00359814	0.955133	-0.187617	0.00307629	0.248755	7.7514e-05	0.0775871	0.224357	0.0040173	0.949912	0.0301979	0.636714	0.0880226	0.167881	-0.0237051	0.710848	0.0400081	0.531422
joint19	HipRight	Y	The variance of amplitudes	0.269322	1.78033e-05	0.201632	0.00144451	-0.184854	0.00354964	-0.300167	1.54892e-06	0.0232764	0.715849	-0.097121	0.12795	-0.173121	0.00637914	0.342947	3.1814e-08	0.0396858	0.534736	-0.185238	0.00348008	0.198847	0.0016855	0.0416845	0.514347	0.00667379	0.916887	-0.0382386	0.549748	0.0245668	0.700833	-0.057874	0.365091	0.0223238	0.727007
joint19	HipRight	Y	The standard deviation of amplitudes	0.26022	3.46574e-05	0.151497	0.0171886	-0.175671	0.00563251	-0.392268	1.64041e-10	-0.0563931	0.37751	-0.14309	0.0245115	-0.142307	0.0253134	0.269451	1.76319e-05	0.0723531	0.257283	-0.0755951	0.236516	0.0564872	0.376713	0.0502223	0.431986	0.0422786	0.508365	-0.0860732	0.177533	-0.006708	0.916462	-0.07698	0.228015	0.0474268	0.458082
joint19	HipRight	Y	The skewness of amplitudes	-0.480468	1.13756e-15	0.0564714	0.376847	-0.0242205	0.704851	-0.296247	2.14685e-06	-0.0118469	0.853032	-0.0660556	0.301132	-0.0712529	0.264608	0.061673	0.33441	0.0740153	0.246484	0.1371	0.0312448	-0.107178	0.0928138	0.0244324	0.702392	0.147366	0.0205059	-0.113642	0.074627	-0.154086	0.0153565	-0.0140407	0.826215	-0.0118908	0.852493
joint19	HipRight	Y	The kurtosis of amplitudes	-0.484313	6.24311e-16	0.0737004	0.248505	-0.010482	0.869805	-0.301829	1.34674e-06	-0.00157077	0.980405	-0.0558505	0.382124	-0.0445325	0.486004	0.0597993	0.34933	0.0779959	0.221918	0.126582	0.0468881	-0.0902991	0.157111	0.0318577	0.618294	0.149972	0.0183544	-0.101937	0.110021	-0.143634	0.0239668	-0.0104315	0.870427	-0.0102009	0.873267
joint19	HipRight	Z	Direct current component	-0.307723	8.14308e-07	0.137363	0.0309192	-0.0168127	0.792619	-0.0686197	0.282715	-0.328255	1.29332e-07	0.00849322	0.894346	-0.066227	0.299877	0.0801326	0.209474	0.196503	0.00191616	-0.0935446	0.142668	0.0568761	0.373431	-0.161698	0.0109229	0.0015564	0.980584	-0.0336682	0.59847	0.0103269	0.871715	0.0659264	0.30208	0.0285686	0.655016
joint19	HipRight	Z	The mean of phases	-0.17788	0.00505023	-0.143048	0.0245543	-0.309632	6.90247e-07	0.14556	0.0221227	0.187243	0.00313688	0.145713	0.021982	-0.207787	0.00101988	0.0775004	0.224877	0.109593	0.0856446	0.137132	0.031205	0.0596923	0.350194	0.100079	0.116687	-0.0571044	0.371513	0.0873415	0.171208	0.0289219	0.65103	0.0170996	0.789163	0.0025579	0.968096
joint19	HipRight	Z	The variance of phases	-0.28198	6.76805e-06	-0.161024	0.0112638	-0.278979	8.5493e-06	0.099232	0.119831	0.127152	0.0458986	0.119135	0.0615501	-0.196927	0.00187243	-0.0219397	0.731522	0.0944402	0.138866	0.103705	0.103957	0.106177	0.0959246	0.039629	0.535322	-0.0486962	0.446126	0.0748827	0.240976	-0.0146154	0.819221	0.000281134	0.996493	0.00679913	0.915332
joint19	HipRight	Z	The standard deviation of phases	-0.295166	2.34714e-06	-0.171241	0.00698476	-0.290564	3.41745e-06	0.118452	0.0630653	0.132553	0.0373546	0.149008	0.0191259	-0.194524	0.00213298	-0.000640684	0.992007	0.107875	0.0906983	0.0994895	0.118869	0.109016	0.0873148	0.0389732	0.542102	-0.0492817	0.44067	0.0727816	0.254468	-0.0108516	0.865257	0.0094948	0.881973	0.00880598	0.89048
joint19	HipRight	Z	The skewness of phases	-0.350609	1.48677e-08	-0.102382	0.108468	-0.153103	0.0160308	-0.0111821	0.861195	0.0187845	0.768949	0.0799846	0.210319	-0.103143	0.105854	-0.0979263	0.124804	0.0742015	0.245294	0.0216335	0.735128	0.146262	0.021482	-0.0143759	0.822135	-0.0341699	0.593028	0.0467273	0.464748	-0.0282105	0.659067	-0.0176721	0.782278	0.0183702	0.773906
joint19	HipRight	Z	The kurtosis of phases	-0.321165	2.47962e-07	-0.0723902	0.257039	-0.132416	0.0375539	-0.0259551	0.684804	0.0203237	0.750618	0.0461758	0.47004	-0.0885946	0.165124	-0.103936	0.103183	0.0623997	0.328735	0.0198676	0.756036	0.145284	0.0223798	0.00206147	0.974285	-0.0394875	0.536781	0.053329	0.404015	-0.0261911	0.682093	-0.028064	0.660727	0.0109158	0.864467
joint19	HipRight	Z	The mean of amplitudes	0.412065	1.52678e-11	-0.376111	1.01673e-09	-0.36085	5.20782e-09	0.20945	0.000926734	0.0735682	0.249357	-0.0887461	0.1644	-0.224063	0.000387003	0.0349779	0.58431	-0.020225	0.75179	0.0706423	0.268734	-0.0669329	0.294743	0.0736998	0.248509	-0.0725078	0.256265	-0.0821541	0.198171	0.0383164	0.548936	-0.0211744	0.740545	-0.0405067	0.526313
joint19	HipRight	Z	The variance of amplitudes	0.381329	5.70238e-10	-0.272969	1.35389e-05	-0.220279	0.000487875	0.137097	0.0312485	-0.0884826	0.165662	-0.156584	0.0137535	-0.122216	0.0550811	-0.0560595	0.380342	-0.0617072	0.334141	0.011524	0.856995	-0.0797248	0.211809	-0.0201852	0.752262	-0.0385701	0.546292	-0.135116	0.0337965	0.0521438	0.414556	-0.00328683	0.959011	-0.0614559	0.336117
joint19	HipRight	Z	The standard deviation of amplitudes	0.414181	1.17353e-11	-0.317441	3.46742e-07	-0.206872	0.0010747	0.161857	0.0108435	-0.0553895	0.386071	-0.175789	0.00559991	-0.148389	0.0196368	-0.04367	0.494498	-0.0810104	0.20451	-0.00535851	0.933224	-0.0685568	0.283158	-0.0320737	0.615914	-0.0329121	0.606714	-0.136091	0.0325217	0.0249486	0.696411	-0.0313606	0.623787	-0.0372709	0.5599
joint19	HipRight	Z	The skewness of amplitudes	-0.352203	1.2658e-08	0.0508155	0.426561	0.221362	0.000456747	-0.119079	0.0616726	-0.0486135	0.446899	-0.0405469	0.525903	0.143059	0.0245434	-0.100698	0.114433	-0.106512	0.0948744	-0.171863	0.00677907	0.0552611	0.387175	-0.241989	0.000122477	0.10962	0.0855659	-0.0395868	0.535757	-0.0611692	0.33838	-0.0446867	0.484494	0.0760082	0.233957
joint19	HipRight	Z	The kurtosis of amplitudes	-0.351181	1.40355e-08	0.0577058	0.366489	0.226908	0.000324323	-0.138447	0.0296062	-0.0315338	0.62187	-0.0442416	0.48886	0.164024	0.00981518	-0.0588014	0.357445	-0.0918663	0.150005	-0.179516	0.00465445	0.062696	0.326439	-0.216182	0.000624195	0.121062	0.0574353	-0.0224692	0.725301	-0.0409117	0.522183	-0.0455683	0.475907	0.081475	0.201917
joint20	KneeLeft	X	Direct current component	-0.026368	0.680064	-0.170707	0.00716597	-0.0592956	0.353411	-0.430467	1.45437e-12	0.168592	0.00792562	0.156971	0.0135185	-0.00259102	0.967683	-0.0326388	0.609706	-0.094648	0.137996	-0.0307651	0.630393	0.120773	0.0580381	-0.0671971	0.292837	0.0629712	0.324315	-0.03678	0.565084	0.0631542	0.322909	0.00138312	0.982745	0.0257309	0.687384
joint20	KneeLeft	X	The mean of phases	0.161029	0.0112609	-0.245227	9.85535e-05	-0.00259231	0.967667	0.19963	0.00161427	0.110853	0.0820848	-0.249584	7.3225e-05	0.211526	0.000821456	-0.0381984	0.550168	0.139168	0.0287599	-0.16813	0.00810059	-0.0831148	0.192958	-0.0970574	0.128201	0.0684014	0.284253	-0.0928412	0.145709	-0.0226836	0.722786	0.0860827	0.177486	-0.0470606	0.461565
joint20	KneeLeft	X	The variance of phases	0.0614232	0.336375	-0.192967	0.00231895	0.0128057	0.841289	0.173405	0.00629167	0.107499	0.0918351	-0.240432	0.000135829	0.149361	0.01884	-0.0474569	0.457797	0.072267	0.257852	-0.185584	0.00341856	-0.130274	0.0407805	-0.114387	0.0727322	0.125496	0.0488256	-0.11066	0.0826231	-0.0632764	0.321971	0.0995422	0.118672	-0.00611751	0.923793
joint20	KneeLeft	X	The standard deviation of phases	0.0725758	0.255818	-0.193956	0.00219925	-0.00427759	0.946672	0.173281	0.00632973	0.102674	0.107457	-0.2267	0.000328569	0.137482	0.0307725	-0.0445337	0.485992	0.0587584	0.357797	-0.204021	0.00126347	-0.139144	0.028788	-0.121936	0.0556448	0.13794	0.0302145	-0.119981	0.0597146	-0.056332	0.378027	0.106107	0.0961447	0.00253725	0.968353
joint20	KneeLeft	X	The skewness of phases	-0.06451	0.312609	-0.0521189	0.414779	0.0501341	0.432796	0.116617	0.0672897	0.0760252	0.233853	-0.194931	0.0020866	0.117989	0.0641116	-0.0332535	0.602985	0.0170929	0.789244	-0.176196	0.00548883	-0.104971	0.0997785	-0.0624784	0.328124	0.119292	0.061207	-0.10307	0.106103	-0.0813918	0.20238	0.0798215	0.211254	0.0233723	0.71473
joint20	KneeLeft	X	The kurtosis of phases	-0.0558996	0.381705	-0.00814149	0.898698	0.0654743	0.305415	0.116499	0.0675702	0.090124	0.15792	-0.201473	0.00145741	0.143996	0.023611	-0.0320974	0.615653	0.0186378	0.770703	-0.147116	0.0207234	-0.0887632	0.164318	-0.0360384	0.572959	0.0903349	0.156946	-0.0831217	0.19292	-0.0816817	0.200772	0.0679969	0.287117	0.012085	0.850113
joint20	KneeLeft	X	The mean of amplitudes	0.613925	5.60889e-27	-0.226247	0.000337982	0.133588	0.0358824	-0.0833536	0.191678	0.158987	0.0123516	0.0288802	0.6515	0.131114	0.0394876	-0.126405	0.0472007	0.134935	0.0340388	0.0487784	0.445357	0.0026205	0.967315	-0.0270534	0.672224	-0.0857101	0.179376	-0.0320011	0.616713	-0.0184414	0.773053	0.0248266	0.697822	0.00030477	0.996198
joint20	KneeLeft	X	The variance of amplitudes	0.37559	1.07662e-09	-0.0754118	0.237659	0.270981	1.57264e-05	-0.223913	0.000390602	0.245709	9.53944e-05	0.296334	2.13145e-06	-0.0752731	0.238525	-0.164549	0.00957925	0.0736641	0.248739	-0.0367576	0.565322	0.0902705	0.157243	-0.111283	0.0808977	-0.00436528	0.94558	-0.0503714	0.430618	-0.0216367	0.73509	-0.0577975	0.365726	0.00749368	0.90672
joint20	KneeLeft	X	The standard deviation of amplitudes	0.465894	1.03376e-14	-0.0811126	0.203937	0.183667	0.00377236	-0.268146	1.94298e-05	0.179343	0.00469477	0.238759	0.000151689	0.0233206	0.715334	-0.173191	0.00635752	0.0935687	0.142565	0.0635586	0.319814	0.0511724	0.423316	-0.0608523	0.340894	-0.0632134	0.322454	-0.0535448	0.402112	-0.0299712	0.639248	-0.0376927	0.555464	0.0311771	0.625819
joint20	KneeLeft	X	The skewness of amplitudes	-0.304935	1.0345e-06	0.180658	0.00439497	0.0305151	0.633177	-0.28536	5.18523e-06	0.0365479	0.567544	0.18679	0.00321164	-0.14857	0.0194859	-0.0745755	0.242916	-0.0618827	0.332766	-0.0322892	0.613544	0.0201579	0.752586	-0.024461	0.70206	0.167341	0.00840765	-0.16832	0.00802825	-0.0243219	0.703673	-0.109313	0.0864537	-0.031931	0.617486
joint20	KneeLeft	X	The kurtosis of amplitudes	-0.294113	2.55928e-06	0.176882	0.00530623	0.0375031	0.557456	-0.303836	1.13605e-06	0.0378714	0.55359	0.175233	0.00575474	-0.13658	0.0318971	-0.0772611	0.226316	-0.0383542	0.548542	-0.0309562	0.62827	0.0397089	0.534498	-0.0196733	0.758347	0.174841	0.00586636	-0.173284	0.00632893	-0.0157393	0.805586	-0.124886	0.0499417	-0.0402859	0.528573
joint20	KneeLeft	Y	Direct current component	-0.285958	4.94502e-06	-0.0516652	0.418858	-0.0895372	0.160656	-0.182326	0.0040392	0.0584789	0.360092	-0.0182976	0.774775	0.0947199	0.137695	0.0309968	0.627819	0.036983	0.562938	0.0184551	0.772889	0.0316131	0.620994	0.097465	0.126599	0.0267785	0.675364	-0.000796936	0.990058	-0.0241967	0.705128	-0.0546983	0.392036	-0.0736003	0.249151
joint20	KneeLeft	Y	The mean of phases	-0.132595	0.037295	0.0683031	0.284947	-0.129839	0.0414629	-0.00827506	0.897045	0.0421638	0.509518	0.216454	0.000614156	-0.0495646	0.438048	-0.00814825	0.898614	-0.0389741	0.542093	-0.14601	0.0217104	-0.0103774	0.871093	-0.175827	0.00558945	-0.342755	3.24198e-08	-0.0690409	0.279764	-0.012546	0.844467	-0.0580188	0.363891	-0.0262427	0.681502
joint20	KneeLeft	Y	The variance of phases	-0.120872	0.0578303	0.0593518	0.352954	-0.0887548	0.164359	-0.0354366	0.579388	0.071288	0.264372	0.0996785	0.118166	-0.0434034	0.497139	0.0254584	0.690523	-0.0385227	0.546785	-0.111406	0.0805594	0.004665	0.94185	-0.189224	0.00282821	-0.327299	1.4134e-07	-0.0513065	0.422099	-0.0300823	0.638006	-0.0350271	0.583782	-0.0548656	0.390587
joint20	KneeLeft	Y	The standard deviation of phases	-0.124643	0.0503928	0.0226598	0.723065	-0.0952427	0.135527	-0.0239829	0.707614	0.063277	0.321967	0.110027	0.0844047	-0.0354844	0.578876	0.0270319	0.672469	-0.0205313	0.748156	-0.107262	0.0925577	0.0138166	0.828946	-0.215173	0.000662792	-0.338249	5.02159e-08	-0.0619435	0.33229	-0.0332246	0.603301	-0.0365515	0.567505	-0.0533497	0.403831
joint20	KneeLeft	Y	The skewness of phases	-0.157868	0.0129877	0.100176	0.116331	-0.0581588	0.362732	-0.0171947	0.788018	0.0938595	0.141323	-0.0225192	0.724714	-0.0113081	0.859646	0.00756127	0.905883	-0.0393488	0.538213	-0.0701119	0.272355	0.0389383	0.542464	-0.155438	0.0144695	-0.2688	1.85077e-05	-0.0188653	0.767983	-0.0402314	0.529131	-0.0263479	0.680295	-0.0360629	0.572699
joint20	KneeLeft	Y	The kurtosis of phases	-0.14401	0.0235969	0.152209	0.0166663	-0.0424537	0.506609	-3.42783e-05	0.999572	0.114103	0.0734502	-0.0328738	0.607133	0.00448254	0.944121	0.00147861	0.981554	-0.0530354	0.406611	-0.0664085	0.298551	0.019914	0.755484	-0.11919	0.0614302	-0.247029	8.72138e-05	-0.0112024	0.860945	-0.0454051	0.477491	-0.0211032	0.741387	-0.0275648	0.666396
joint20	KneeLeft	Y	The mean of amplitudes	0.442423	2.91941e-13	-0.0384727	0.547306	0.487078	4.03672e-16	-0.239857	0.000141092	0.117271	0.0657598	0.124941	0.04984	-0.13144	0.0389955	0.0203099	0.750782	0.037481	0.557688	0.0116116	0.85592	-0.15617	0.0140084	-0.00728135	0.909352	-0.09196	0.149588	0.0163132	0.798647	-0.0527501	0.409143	-0.021623	0.735252	-0.00296303	0.963046
joint20	KneeLeft	Y	The variance of amplitudes	0.350911	1.44226e-08	-0.0443644	0.487653	0.545056	1.62898e-20	-0.174381	0.00599962	0.251138	6.57744e-05	0.124428	0.0507943	-0.122818	0.0538857	-0.0177192	0.781713	0.0136588	0.830869	-0.0682859	0.285069	-0.00823097	0.89759	-0.0582817	0.361717	0.0166526	0.79455	-0.0181267	0.776823	-0.0263075	0.680759	-0.0345282	0.589155	0.00851523	0.894074
joint20	KneeLeft	Y	The standard deviation of amplitudes	0.394058	1.33182e-10	-0.0534614	0.402847	0.57631	2.93308e-23	-0.210464	0.000873833	0.151244	0.0173774	-0.0178696	0.779906	-0.0919703	0.149542	0.0620081	0.331785	0.038082	0.551385	0.0113874	0.858672	-0.0631999	0.322558	-0.00364471	0.954553	0.0389855	0.541975	0.0173207	0.786502	-0.0399058	0.532473	0.00102109	0.987261	-0.00536553	0.933137
joint20	KneeLeft	Y	The skewness of amplitudes	0.0142197	0.824036	-0.0895702	0.160501	0.175164	0.00577442	-0.0425227	0.505918	0.0355956	0.577687	-0.0937858	0.141637	-0.0134329	0.833626	0.183157	0.00387188	-0.00858839	0.893169	0.0278539	0.66311	-0.0279023	0.662561	-0.0746725	0.242303	0.0525686	0.410759	0.0641167	0.315574	-0.150358	0.0180532	0.0993992	0.119205	-0.0188558	0.768097
joint20	KneeLeft	Y	The kurtosis of amplitudes	0.0183012	0.774732	-0.0711032	0.265616	0.187323	0.00312375	-0.0270869	0.671841	0.0360485	0.572853	-0.0662997	0.299345	-0.0126122	0.843656	0.18552	0.00342993	-0.0159901	0.802552	0.0113997	0.858521	-0.0199386	0.755192	-0.064423	0.313263	0.0349144	0.584993	0.071499	0.262957	-0.147368	0.0205049	0.0947398	0.137612	6.61739e-06	0.999917
joint20	KneeLeft	Z	Direct current component	0.137008	0.0313587	-0.13266	0.0371999	0.568006	1.67904e-22	0.0569167	0.37309	0.0121905	0.84882	-0.236049	0.000181088	-0.241857	0.000123563	0.137144	0.03119	-0.126305	0.0473766	-0.0157702	0.805212	0.0379663	0.552596	-0.0521975	0.414075	0.0089348	0.888888	0.00232771	0.970966	-0.0334321	0.601039	-0.111689	0.0797877	-0.00473915	0.940927
joint20	KneeLeft	Z	The mean of phases	0.250022	7.10488e-05	-0.124681	0.0503208	0.226501	0.000332674	0.0415221	0.515988	-0.130182	0.0409244	0.0193325	0.762407	-0.181708	0.0041679	-0.164894	0.00942698	0.0480597	0.452099	0.044833	0.483063	0.0835817	0.190461	0.165106	0.0093348	-0.109499	0.085916	-0.0114081	0.858417	-0.0372995	0.559599	0.054854	0.390687	0.0856891	0.179483
joint20	KneeLeft	Z	The variance of phases	0.18517	0.00349229	-0.144453	0.0231671	0.187054	0.00316781	0.0546624	0.392346	-0.110975	0.0817458	-0.0484351	0.44857	-0.219121	0.000523303	-0.175436	0.00569772	-0.00301329	0.96242	0.107529	0.0917433	0.0711775	0.265116	0.168805	0.00784586	-0.082837	0.194455	-0.0204988	0.748541	0.00343351	0.957183	0.0321039	0.615581	0.0691799	0.278795
joint20	KneeLeft	Z	The standard deviation of phases	0.184319	0.00364853	-0.147371	0.0205015	0.164265	0.00970612	0.0479448	0.453182	-0.110482	0.08312	-0.0680323	0.286866	-0.211487	0.000823309	-0.173508	0.00626029	-0.0123902	0.846374	0.108192	0.0897483	0.0759181	0.234514	0.170634	0.007191	-0.0748699	0.241057	-0.0152429	0.811602	0.016119	0.800993	0.0388974	0.542889	0.0678022	0.288503
joint20	KneeLeft	Z	The skewness of phases	0.0755875	0.236564	-0.118606	0.0627222	0.152157	0.0167039	0.0571527	0.371108	-0.0908922	0.154392	-0.114411	0.0726724	-0.189841	0.00273778	-0.157339	0.0132986	-0.0250748	0.694951	0.137002	0.0313662	0.0725756	0.255819	0.15202	0.016804	-0.0502673	0.431573	-0.0268514	0.674531	0.0221163	0.729445	0.0145307	0.820252	0.0340703	0.594106
joint20	KneeLeft	Z	The kurtosis of phases	0.0396792	0.534805	-0.0832079	0.192458	0.161052	0.0112494	0.0520547	0.415355	-0.0696424	0.275586	-0.122918	0.0536898	-0.145693	0.0219999	-0.138836	0.0291477	-0.01955	0.759815	0.130635	0.0402209	0.0696701	0.275395	0.146539	0.0212334	-0.04859	0.447118	-0.0193879	0.761747	0.0178775	0.779812	0.0046046	0.942602	0.0210118	0.742467
joint20	KneeLeft	Z	The mean of amplitudes	0.452599	7.07759e-14	-0.275649	1.10441e-05	0.148867	0.0192415	-0.211386	0.000828173	-0.0893796	0.161397	-0.0853086	0.18143	0.0791622	0.215062	-0.00823432	0.897549	0.138184	0.0299203	0.0111453	0.861646	-0.0913172	0.152467	0.148955	0.0191691	-0.0469989	0.462154	0.077388	0.225552	-0.0490179	0.443123	0.032557	0.610603	0.0675831	0.290067
joint20	KneeLeft	Z	The variance of amplitudes	-0.123786	0.0520093	-0.165644	0.00910364	-0.140137	0.0276566	-0.224235	0.000382924	0.0367778	0.565108	-0.109554	0.0857573	0.172266	0.0066486	0.144626	0.0230015	0.0893234	0.161662	-0.0469958	0.462184	-0.245163	9.89859e-05	0.0236803	0.711137	0.0474862	0.45752	0.0929944	0.145043	0.0630082	0.32403	0.007659	0.904672	-0.0264425	0.679211
joint20	KneeLeft	Z	The standard deviation of amplitudes	-0.132404	0.0375718	-0.161058	0.0112462	-0.157683	0.013096	-0.217838	0.00056533	0.0373898	0.558648	-0.0960929	0.132056	0.16828	0.0080435	0.149399	0.0188098	0.0905335	0.156033	-0.0525811	0.410648	-0.245225	9.85676e-05	0.0202114	0.75195	0.04887	0.444502	0.0975156	0.126401	0.0606535	0.342477	0.011733	0.85443	-0.0250902	0.694773
joint20	KneeLeft	Z	The skewness of amplitudes	-0.608564	2.03835e-26	0.177701	0.00509525	-0.223664	0.000396645	0.0649537	0.309285	0.069033	0.279819	0.0323725	0.612628	-0.0585952	0.359136	0.0678076	0.288465	-0.0198135	0.756679	-0.0336632	0.598524	-0.0747153	0.242032	-0.023411	0.714279	-0.00404537	0.949563	0.0266596	0.676724	0.0707924	0.267716	0.0182515	0.775327	-0.0128759	0.84043
joint20	KneeLeft	Z	The kurtosis of amplitudes	-0.606741	3.14396e-26	0.188661	0.00291293	-0.205442	0.00116586	0.039684	0.534754	0.0599755	0.347909	0.0194043	0.761551	-0.0475473	0.45694	0.0561152	0.379869	-0.0144542	0.821182	-0.038127	0.550914	-0.0609287	0.340287	-0.010135	0.874079	-0.0176611	0.782411	0.02427	0.704277	0.0565852	0.375884	0.0117082	0.854734	-0.00881482	0.89037
joint21	KneeRight	X	Direct current component	-0.106455	0.0950503	0.0428418	0.502727	0.21084	0.000854959	-0.0930482	0.144809	-0.108286	0.0894666	0.158085	0.0128621	-0.211729	0.000811793	-0.0208967	0.743829	-0.0730258	0.252874	-0.100982	0.113408	0.0138461	0.828586	-0.0538799	0.399169	0.0305125	0.633206	-0.0330037	0.605712	-0.0329454	0.60635	0.011434	0.8581	-0.0277168	0.664667
joint21	KneeRight	X	The mean of phases	0.209576	0.000919986	-0.254318	5.26997e-05	-0.0567955	0.37411	0.0333039	0.602436	-0.181552	0.00420094	0.0396814	0.534782	0.0996865	0.118136	-0.140632	0.0271061	0.0392573	0.539159	-0.0790974	0.215438	0.194575	0.00212707	-0.133526	0.035969	0.0778749	0.222637	-0.0745526	0.243062	0.234164	0.000204596	0.0527398	0.409235	0.0565957	0.375795
joint21	KneeRight	X	The variance of phases	0.101067	0.113103	-0.225765	0.000348285	-0.110061	0.0843086	-0.04885	0.444688	-0.120677	0.058239	0.0142625	0.823515	0.0761689	0.232967	-0.0736874	0.248589	0.00865736	0.892317	-0.0494017	0.439556	0.182767	0.00394967	-0.124708	0.0502713	0.0954481	0.134682	-0.0911389	0.153272	0.256157	4.62964e-05	0.0430302	0.500849	0.0464621	0.467289
joint21	KneeRight	X	The standard deviation of phases	0.094979	0.136617	-0.229377	0.000277716	-0.116264	0.0681287	-0.0388631	0.543245	-0.118882	0.0621087	0.0159641	0.802867	0.0791518	0.215122	-0.083412	0.191365	0.0144617	0.821091	-0.043045	0.500702	0.196904	0.00187476	-0.117252	0.0658028	0.0835134	0.190824	-0.0928402	0.145713	0.269481	1.75929e-05	0.0533088	0.404193	0.0495228	0.438434
joint21	KneeRight	X	The skewness of phases	-0.0477956	0.454591	-0.051655	0.418951	-0.0973164	0.127181	-0.0649811	0.30908	-0.0196954	0.758084	0.00520574	0.935124	0.057787	0.365813	-0.0363534	0.569608	-0.014794	0.817051	-0.0274339	0.667886	0.139333	0.0285696	-0.0810397	0.204346	0.0512515	0.422598	-0.0605918	0.342969	0.196605	0.00190554	0.0200684	0.753649	0.0357302	0.576247
joint21	KneeRight	X	The kurtosis of phases	-0.0336724	0.598424	-0.00549812	0.931489	-0.0882008	0.167019	-0.0481708	0.451052	-0.0118804	0.852621	-0.00126906	0.984168	0.0684325	0.284034	-0.0336166	0.599031	-0.0118519	0.852972	-0.033997	0.594901	0.118315	0.0633738	-0.0701837	0.271862	0.0529465	0.407399	-0.0394595	0.53707	0.175668	0.00563325	0.0129888	0.83905	0.0350218	0.583839
joint21	KneeRight	X	The mean of amplitudes	0.573655	5.15166e-23	-0.350022	1.57711e-08	-0.0448189	0.483201	-0.119819	0.0600625	0.0601825	0.346244	0.148858	0.0192493	0.183782	0.00375026	-0.1056	0.0977528	-0.0101912	0.873387	-0.0834233	0.191305	0.135465	0.0333359	-0.139312	0.0285945	0.0462686	0.469147	0.0675248	0.290484	0.0500808	0.433286	-0.034524	0.589199	0.00351064	0.956223
joint21	KneeRight	X	The variance of amplitudes	0.427364	2.18387e-12	-0.232676	0.000225136	0.126049	0.0478308	-0.229829	0.000269891	0.274206	1.2328e-05	0.27753	9.56078e-06	0.0296659	0.642667	-0.0788185	0.217066	-0.0440546	0.490701	-0.111193	0.0811453	0.134526	0.0345899	-0.124892	0.0499311	0.0816669	0.200853	0.0148537	0.816327	-0.00464252	0.94213	-0.0609932	0.339775	-0.0282272	0.658878
joint21	KneeRight	X	The standard deviation of amplitudes	0.472252	3.99828e-15	-0.29246	2.92962e-06	-0.0372764	0.559843	-0.284478	5.56045e-06	0.243406	0.000111412	0.201813	0.00143004	0.143987	0.0236196	-0.0166677	0.794368	-0.0913619	0.152265	-0.0408292	0.523023	0.105447	0.0982414	-0.0557174	0.383261	0.0413176	0.51806	0.0446988	0.484375	-0.0151115	0.813196	-0.0564788	0.376784	-0.0197604	0.757311
joint21	KneeRight	X	The skewness of amplitudes	-0.3969	9.54414e-11	0.165147	0.00931698	-0.059384	0.352693	-0.280372	7.67316e-06	0.199178	0.00165505	0.0668592	0.295277	-0.0529351	0.4075	0.212351	0.000782747	-0.155849	0.0142091	0.147948	0.0200078	-0.0336426	0.598748	0.155661	0.014328	0.122973	0.0535814	-0.0545667	0.393177	0.0270142	0.672671	0.0251995	0.693511	-0.0131088	0.837585
joint21	KneeRight	X	The kurtosis of amplitudes	-0.389807	2.17976e-10	0.175223	0.00575781	-0.0449228	0.482186	-0.273875	1.26412e-05	0.201463	0.00145818	0.0849711	0.183169	-0.0331661	0.603938	0.204867	0.0012045	-0.170919	0.00709357	0.147349	0.0205211	-0.0299187	0.639836	0.156175	0.0140054	0.12172	0.0560832	-0.0649822	0.309072	0.0292232	0.647638	0.0187791	0.769014	-0.00726552	0.909548
joint21	KneeRight	Y	Direct current component	-0.30588	9.54173e-07	-0.0513289	0.421897	-0.109568	0.0857164	-0.168244	0.00805705	0.04738	0.458527	-0.0567949	0.374115	0.107742	0.0910998	0.0286945	0.653594	0.0205525	0.747905	0.0481097	0.451627	0.0283324	0.657686	0.104472	0.101408	0.00699418	0.912912	-1.07553e-05	0.999866	-0.00922704	0.885278	-0.0646561	0.311512	-0.0638128	0.317878
joint21	KneeRight	Y	The mean of phases	-0.0690846	0.279459	-0.00313243	0.960935	-0.0770718	0.227459	0.0528603	0.408164	0.0979216	0.124822	0.159812	0.0119003	0.0412385	0.518861	-0.0145989	0.819422	-0.0457712	0.473943	-0.119922	0.0598408	0.0950724	0.13623	0.0887329	0.164463	0.00283302	0.964666	0.122866	0.0537918	0.0145217	0.820362	-0.00566714	0.929388	-0.0179545	0.778888
joint21	KneeRight	Y	The variance of phases	-0.0610906	0.339003	0.0467138	0.464877	0.114356	0.0728092	0.0317652	0.619315	0.112544	0.0774949	0.103203	0.105651	0.0141263	0.825173	0.0194933	0.760491	-0.0976583	0.125845	-0.0759027	0.23461	0.0394198	0.53748	0.124025	0.0515542	-0.0083858	0.895675	0.0789616	0.21623	0.0403874	0.527534	0.0674054	0.29134	-0.00700913	0.912727
joint21	KneeRight	Y	The standard deviation of phases	-0.0746377	0.242523	0.0208463	0.744425	0.111218	0.0810758	0.033782	0.597233	0.108551	0.0886802	0.114691	0.0719695	0.00485219	0.939521	0.0145327	0.820227	-0.0924191	0.147558	-0.0704353	0.270143	0.0518646	0.417063	0.117663	0.0648554	2.71738e-06	0.999966	0.0847695	0.184214	0.0427128	0.504016	0.0664496	0.298252	-0.0100785	0.874775
joint21	KneeRight	Y	The skewness of phases	-0.0772698	0.226263	0.105164	0.0991528	0.191366	0.00252559	0.0351355	0.582617	0.100177	0.116327	0.0101986	0.873295	0.0427941	0.503204	0.0375661	0.556794	-0.0985644	0.122354	-0.0481074	0.45165	-0.00734527	0.908559	0.129046	0.0427324	-0.0454378	0.477174	0.0477159	0.455344	0.0163328	0.79841	0.0992455	0.11978	0.0199516	0.755037
joint21	KneeRight	Y	The kurtosis of phases	-0.0536644	0.40106	0.141867	0.0257746	0.169209	0.00769677	0.0458233	0.47344	0.104591	0.101017	-0.0089771	0.888365	0.0810537	0.204268	0.0404315	0.527082	-0.0916955	0.150767	-0.045953	0.472187	-0.0115588	0.856567	0.135194	0.0336937	-0.0485934	0.447086	0.0479588	0.45305	0.000807564	0.989925	0.0813484	0.202622	0.0110781	0.862472
joint21	KneeRight	Y	The mean of amplitudes	0.420116	5.55449e-12	-0.082902	0.194104	0.410285	1.90243e-11	-0.131488	0.0389249	0.156296	0.0139305	0.253793	5.46754e-05	-0.120721	0.0581476	-0.00625086	0.922137	0.0751295	0.239424	-0.198127	0.00175343	0.0967118	0.129572	0.0410938	0.520331	0.0373802	0.55875	0.0498521	0.435392	-0.0246706	0.699629	-0.00827523	0.897043	-0.0478334	0.454234
joint21	KneeRight	Y	The variance of amplitudes	0.329674	1.13306e-07	-0.0816838	0.20076	0.431331	1.29766e-12	-0.154964	0.0147756	0.233838	0.000208944	0.28009	7.84349e-06	-0.142478	0.025137	-0.0757161	0.235765	0.0496966	0.436827	-0.167082	0.00851076	0.0951	0.136116	-0.0765253	0.230782	0.0493248	0.44027	-0.0113406	0.859247	-0.0283177	0.657854	-0.032948	0.606321	-0.022312	0.727145
joint21	KneeRight	Y	The standard deviation of amplitudes	0.412573	1.43352e-11	-0.0643245	0.314005	0.537749	6.50312e-20	-0.138266	0.0298226	0.155493	0.0144343	0.172538	0.00656167	-0.142225	0.0253987	-0.000543335	0.993221	0.0542879	0.395603	-0.123939	0.0517163	0.0555041	0.385088	0.000111828	0.998605	0.0461776	0.470023	-0.00189788	0.976325	-0.00837363	0.895825	0.0163245	0.798511	-0.0450794	0.480659
joint21	KneeRight	Y	The skewness of amplitudes	0.026171	0.682324	0.163175	0.0102073	0.334421	7.2435e-08	-0.0182638	0.775181	0.027014	0.672673	-0.148954	0.0191701	-0.113936	0.0738761	0.0167573	0.793288	-0.0885327	0.165421	0.165919	0.00898767	0.0221793	0.728705	-0.0816952	0.200697	0.1136	0.0747354	-0.0392052	0.539699	0.124109	0.0513945	0.106323	0.095466	-0.0395313	0.536329
joint21	KneeRight	Y	The kurtosis of amplitudes	0.0267068	0.676184	0.193987	0.00219548	0.301867	1.34243e-06	0.010968	0.863826	0.0421256	0.509902	-0.149428	0.0187864	-0.113666	0.0745667	0.00981046	0.878079	-0.087078	0.172508	0.154697	0.0149497	0.0363528	0.569615	-0.0786079	0.218301	0.123817	0.0519489	-0.0124411	0.845751	0.116853	0.0667351	0.0887105	0.16457	-0.0371408	0.561272
joint21	KneeRight	Z	Direct current component	0.0678299	0.288305	-0.0590487	0.355423	0.493465	1.45186e-16	0.110541	0.082954	-0.213725	0.000722049	-0.249028	7.60734e-05	-0.234212	0.000203963	0.0989581	0.120861	-0.0445553	0.485781	-0.0630814	0.323467	0.0371936	0.560716	-0.121973	0.0555709	0.0237166	0.710714	-0.0601811	0.346256	-0.0336942	0.598187	-0.0580601	0.363548	-0.0198194	0.756609
joint21	KneeRight	Z	The mean of phases	0.28141	7.07668e-06	-0.221655	0.000448664	0.12877	0.0431827	-0.0340911	0.59388	0.00338809	0.957749	0.0633586	0.321342	0.20999	0.000898214	-0.151422	0.0172442	-0.0453635	0.477895	0.0192426	0.763479	0.24335	0.000111825	-0.00214626	0.973228	0.0580329	0.363774	-0.0220353	0.730397	-0.0473984	0.458352	-0.0031972	0.960128	0.0243947	0.702829
joint21	KneeRight	Z	The variance of phases	0.185711	0.00339613	-0.202884	0.00134683	0.132257	0.0377858	-0.0431769	0.499389	-0.029143	0.64854	0.0278722	0.662903	0.18735	0.00311946	-0.13947	0.0284118	-0.0420444	0.510719	0.0310078	0.627697	0.254537	5.18941e-05	0.00655171	0.918402	0.0587094	0.358199	-0.030795	0.630062	-0.0481046	0.451676	-0.0354351	0.579404	-0.0118638	0.852825
joint21	KneeRight	Z	The standard deviation of phases	0.179343	0.00469497	-0.197635	0.00180141	0.110619	0.0827367	-0.0355492	0.578182	-0.0436847	0.494352	0.0288565	0.651767	0.159951	0.0118256	-0.136418	0.0321024	-0.0578042	0.365671	0.0109936	0.863511	0.258379	3.95385e-05	0.0175912	0.78325	0.0495048	0.438602	-0.0298535	0.640566	-0.057794	0.365756	-0.0502535	0.4317	-0.00819925	0.897983
joint21	KneeRight	Z	The skewness of phases	0.0225628	0.724203	-0.134316	0.0348751	0.136326	0.0322197	-0.0332485	0.603039	-0.0831347	0.192851	-0.0458623	0.473063	0.140432	0.0273276	-0.0991748	0.120045	-0.0219373	0.73155	0.0236239	0.711795	0.24547	9.69494e-05	0.0245485	0.701045	0.0464842	0.467076	-0.0329854	0.605912	-0.0547637	0.391469	-0.0695775	0.276035	-0.0494133	0.439449
joint21	KneeRight	Z	The kurtosis of phases	7.42741e-06	0.999907	-0.0942351	0.13973	0.149847	0.0184528	-0.0342032	0.592666	-0.0689815	0.280179	-0.0716237	0.262124	0.156322	0.0139144	-0.0978621	0.125053	-0.00597288	0.925589	0.023867	0.708962	0.22374	0.000394802	0.0322845	0.613595	0.0362988	0.570188	-0.0222808	0.727512	-0.0513388	0.421807	-0.062215	0.330171	-0.0563929	0.377512
joint21	KneeRight	Z	The mean of amplitudes	0.372887	1.44603e-09	-0.331227	9.79617e-08	0.032185	0.614689	-0.0818917	0.199613	-0.022077	0.729906	-0.0532477	0.404732	0.22726	0.00031727	-0.0776612	0.223913	0.0138576	0.828446	-0.0022001	0.972557	0.0380481	0.551739	0.104083	0.102693	0.0246125	0.700303	0.0605876	0.343002	-0.0581607	0.362716	0.0505844	0.42867	0.0352677	0.581198
joint21	KneeRight	Z	The variance of amplitudes	-0.285755	5.02513e-06	-0.171413	0.00692722	-0.181308	0.00425316	-0.130908	0.0398021	-0.063142	0.323002	-0.157615	0.0131358	0.0465081	0.466847	0.202958	0.00134124	0.107033	0.0932602	-0.0220855	0.729807	-0.216799	0.000601654	0.0838428	0.189074	-0.0246484	0.699886	0.058693	0.358333	0.0900267	0.158372	0.0340072	0.594789	-0.0404089	0.527313
joint21	KneeRight	Z	The standard deviation of amplitudes	-0.30295	1.22487e-06	-0.164488	0.00960627	-0.20667	0.00108715	-0.127256	0.0457194	-0.0585418	0.359575	-0.145454	0.022221	0.0314241	0.623083	0.201369	0.00146584	0.0992752	0.119669	-0.0123632	0.846705	-0.216181	0.00062425	0.0838638	0.188963	-0.02294	0.719783	0.06498	0.309089	0.0864261	0.175756	0.0438591	0.492628	-0.0268826	0.674174
joint21	KneeRight	Z	The skewness of amplitudes	-0.627976	1.69107e-28	0.149396	0.0188125	-0.242031	0.000122142	-0.0242558	0.704441	0.0283377	0.657627	-0.0259935	0.684363	-0.0825277	0.196132	0.13223	0.0378257	-0.0546058	0.392838	0.0136443	0.831046	-0.0424359	0.506788	-0.0565923	0.375824	-0.0144613	0.821095	-0.018165	0.776364	0.11667	0.0671653	0.0252507	0.69292	-0.0345973	0.588409
joint21	KneeRight	Z	The kurtosis of amplitudes	-0.635561	2.36841e-29	0.16385	0.0098946	-0.224548	0.000375578	-0.0391782	0.539978	0.0216895	0.734468	-0.0355231	0.578462	-0.0658967	0.302299	0.128963	0.0428674	-0.0535175	0.402353	0.00135415	0.983107	-0.0278375	0.663297	-0.0402421	0.529021	-0.0304762	0.63361	-0.018005	0.778283	0.105185	0.0990851	0.0210133	0.742449	-0.0288489	0.651853
joint2	Neck	X	Direct current component	-0.0475886	0.456549	-0.262426	2.95547e-05	-0.269334	1.77873e-05	-0.0218418	0.732674	0.0457949	0.473714	0.0855669	0.180107	0.0295756	0.643679	-0.0858116	0.17886	0.195538	0.00201922	0.0757213	0.235733	-0.0420442	0.510721	0.00819402	0.898048	-0.106049	0.0963268	0.217929	0.000562264	-0.195114	0.00206606	-0.0460512	0.47124	0.0416791	0.514402
joint2	Neck	X	The mean of phases	0.181152	0.00428672	-0.203899	0.00127213	0.0634264	0.320823	0.300127	1.55407e-06	0.190053	0.00270735	-0.183357	0.00383256	0.187173	0.00314838	-0.107489	0.0918645	-0.0269944	0.672897	-0.0392178	0.539568	0.026855	0.674489	-0.158382	0.0126921	-0.00219141	0.972665	-0.0327191	0.608826	0.024221	0.704846	0.0326416	0.609676	-0.00666828	0.916955
joint2	Neck	X	The variance of phases	0.0183005	0.77474	-0.130514	0.040407	0.0151727	0.812454	0.20006	0.00157633	0.167144	0.00848608	-0.20695	0.00106991	0.131023	0.0396258	-0.121207	0.0571345	-0.0628246	0.325445	-0.051598	0.419464	-0.0245532	0.700991	-0.138231	0.0298646	-0.0158421	0.804343	-0.0313359	0.62406	-0.0224715	0.725273	0.000787691	0.990173	0.00143322	0.98212
joint2	Neck	X	The standard deviation of phases	0.0103001	0.872045	-0.173036	0.00640537	0.0184703	0.772707	0.1934	0.00226587	0.139442	0.0284439	-0.189052	0.00285383	0.122895	0.0537342	-0.131326	0.0391675	-0.0580675	0.363487	-0.0744168	0.243924	-0.0360765	0.572554	-0.169827	0.00747377	-0.0119426	0.851859	-0.0398496	0.53305	-0.0252987	0.692366	-0.0058569	0.92703	-0.0230933	0.71799
joint2	Neck	X	The skewness of phases	-0.0960325	0.1323	-0.0516225	0.419243	0.0189816	0.766594	0.10917	0.0868677	0.107336	0.0923302	-0.184508	0.00361327	0.131354	0.0391257	-0.108607	0.0885176	-0.0526419	0.410106	-0.0755607	0.236731	-0.0363522	0.569621	-0.0780635	0.221516	-0.0350214	0.583842	-0.014457	0.821148	-0.0523204	0.412975	-0.0140353	0.826281	0.000603098	0.992476
joint2	Neck	X	The kurtosis of phases	-0.0748317	0.241297	0.014286	0.823228	0.0311411	0.626218	0.114269	0.0730298	0.128836	0.0430744	-0.191819	0.00246548	0.154919	0.0148048	-0.0895643	0.160529	-0.0516438	0.419052	-0.0590291	0.355583	-0.0288219	0.652157	-0.0396509	0.535096	-0.0371259	0.561429	-0.00634144	0.921012	-0.048982	0.443458	-0.0096794	0.879695	0.00425227	0.946987
joint2	Neck	X	The mean of amplitudes	0.466975	8.80775e-15	-0.208934	0.000954758	-0.170837	0.00712143	-0.333689	7.76491e-08	-0.193064	0.00230704	-0.104008	0.102943	0.0385575	0.546422	0.0262935	0.680918	-0.0688566	0.281053	-0.0894156	0.161227	-0.0419485	0.511684	-0.113246	0.0756514	-0.151311	0.0173268	0.015146	0.812778	-0.0616345	0.334712	-0.00468083	0.941653	-0.0283727	0.657231
joint2	Neck	X	The variance of amplitudes	0.0753545	0.238016	-0.0742812	0.244786	-0.184594	0.00359727	-0.541214	3.38736e-20	-0.26828	1.9237e-05	-0.0408797	0.522508	-0.0610967	0.338954	0.071916	0.260176	-0.103595	0.104326	-0.103208	0.105632	-0.117008	0.0663704	-0.0749413	0.240607	-0.110602	0.0827846	-0.00849086	0.894375	-0.0186027	0.771123	-0.0454034	0.477508	-0.0277941	0.663789
joint2	Neck	X	The standard deviation of amplitudes	0.0711798	0.2651	-0.0789632	0.21622	-0.195975	0.00197197	-0.567618	1.81962e-22	-0.270962	1.57488e-05	-0.0409713	0.521576	-0.115017	0.0711587	0.067393	0.29143	-0.123656	0.052258	-0.057	0.372389	-0.138679	0.0293324	-0.0600478	0.347327	-0.0995673	0.118579	0.00987005	0.877344	-0.0516464	0.419027	-0.032231	0.614183	-0.00392805	0.951024
joint2	Neck	X	The skewness of amplitudes	-0.394305	1.294e-10	0.0226128	0.723616	-0.09238	0.147729	-0.334782	6.99887e-08	-0.114489	0.072475	-0.0278231	0.66346	-0.242888	0.000115346	0.0178025	0.780712	-0.175507	0.00567796	0.0739349	0.246999	-0.203134	0.00132812	0.0150284	0.814205	0.153391	0.0158307	-0.0363646	0.569489	-0.010392	0.870913	0.0027073	0.966233	0.0500468	0.433599
joint2	Neck	X	The kurtosis of amplitudes	-0.389192	2.3395e-10	0.0189926	0.766463	-0.0797897	0.211436	-0.339172	4.59356e-08	-0.110363	0.0834553	-0.0253394	0.691895	-0.220612	0.000478112	0.0245316	0.701241	-0.185435	0.003445	0.0695029	0.276551	-0.195087	0.00206915	0.0295703	0.643739	0.150189	0.0181845	-0.0282934	0.658129	-0.00501683	0.937473	0.00804529	0.899888	0.0514399	0.420893
joint2	Neck	Y	Direct current component	-0.28009	7.84373e-06	-0.0236755	0.711193	-0.00682852	0.914967	-0.206518	0.00109664	-0.0641558	0.315278	-0.0427954	0.503191	0.106967	0.0934624	0.00108487	0.986466	0.0234526	0.713792	0.0378135	0.554197	0.0366387	0.566581	0.0443712	0.487587	-0.00497738	0.937964	-0.0431267	0.499888	0.0181807	0.776175	0.0209773	0.742876	0.0447671	0.483707
joint2	Neck	Y	The mean of phases	-0.144279	0.0233351	-0.143468	0.024132	0.0115381	0.856822	0.203829	0.00127716	-0.146391	0.0213657	0.0269145	0.67381	-8.89862e-05	0.99889	-0.0319539	0.617234	-0.167283	0.00843063	0.165854	0.00901504	0.0835786	0.190477	0.0733906	0.250505	-0.0911502	0.153221	0.0302564	0.636061	0.0112106	0.860844	-0.00838614	0.895671	-0.0287243	0.653259
joint2	Neck	Y	The variance of phases	-0.225999	0.000343235	-0.0263856	0.679863	0.0547945	0.391203	0.0715279	0.262764	-0.0113617	0.858988	0.0428897	0.502249	0.00299687	0.962624	-0.0166656	0.794394	-0.10825	0.0895759	0.116961	0.06648	0.0334888	0.600422	0.0994736	0.118928	-0.0387769	0.544141	0.0613265	0.337137	-0.0161097	0.801106	0.00608348	0.924215	-0.0155339	0.808074
joint2	Neck	Y	The standard deviation of phases	-0.244724	0.000101959	-0.0560221	0.380661	0.0381735	0.550428	0.0709233	0.26683	-0.0257403	0.687275	0.0679169	0.287686	-0.0211668	0.740635	-0.00969065	0.879556	-0.101495	0.111576	0.113656	0.074593	0.0284356	0.65652	0.104621	0.100921	-0.0518442	0.417246	0.0623683	0.328979	-0.00149077	0.981403	0.013094	0.837764	-0.0214645	0.737121
joint2	Neck	Y	The skewness of phases	-0.225971	0.00034384	0.127919	0.0445941	0.0663339	0.299096	-0.050027	0.433781	0.0696936	0.275233	0.00362694	0.954774	0.0311225	0.626425	-0.00569042	0.929099	-0.0284996	0.655796	0.0305545	0.632737	0.0120751	0.850235	0.124521	0.0506192	-0.00923168	0.885221	0.0629434	0.324529	-0.0286279	0.654346	0.019957	0.754973	-0.0128774	0.840412
joint2	Neck	Y	The kurtosis of phases	-0.188589	0.002924	0.145603	0.0220828	0.0720045	0.259589	-0.01239	0.846377	0.063967	0.316708	-0.0253073	0.692267	0.0585268	0.359698	-0.0140929	0.825579	-0.0416503	0.514693	0.0437011	0.49419	0.0191298	0.764825	0.1183	0.0634065	-0.0206096	0.747228	0.0611433	0.338586	-0.0328262	0.607653	0.00873986	0.891297	-0.0132768	0.835532
joint2	Neck	Y	The mean of amplitudes	0.71146	2.06859e-39	-0.048922	0.444017	0.0822228	0.197795	-0.0342937	0.591688	-0.181833	0.00414148	0.312914	5.18034e-07	-0.00949813	0.881932	0.0146487	0.818817	-0.137123	0.0312153	0.123277	0.0529894	-0.182851	0.00393279	0.00333801	0.958373	0.0680433	0.286788	-0.000510173	0.993635	0.079155	0.215104	-0.0185345	0.771939	-0.0327893	0.608058
joint2	Neck	Y	The variance of amplitudes	0.585204	4.27982e-24	0.0729278	0.253513	0.15747	0.0132208	-0.0543266	0.395266	-0.0565008	0.376598	0.434969	8.0032e-13	-0.102401	0.108401	0.0592	0.354189	-0.0761585	0.233031	0.0605613	0.343212	-0.210021	0.000896608	0.0170272	0.790035	0.0392056	0.539695	-0.00236491	0.970502	0.0335336	0.599933	-0.0317943	0.618993	-0.0219073	0.731903
joint2	Neck	Y	The standard deviation of amplitudes	0.683932	2.07871e-35	0.031368	0.623704	0.126784	0.0465353	-0.083385	0.19151	-0.0467481	0.464548	0.402081	5.15593e-11	-0.0488873	0.44434	0.043096	0.500194	-0.0642731	0.314393	0.0591259	0.354793	-0.185802	0.00338033	-0.0117724	0.853946	0.0667423	0.296124	0.00999874	0.875758	0.0633439	0.321454	0.00661717	0.917589	-0.0167867	0.792933
joint2	Neck	Y	The skewness of amplitudes	-0.0316983	0.620052	0.0716988	0.261623	0.136691	0.031757	-0.196226	0.00194523	0.310078	6.63974e-07	0.260397	3.42191e-05	0.00960025	0.880672	-0.0108269	0.86556	0.19982	0.00159742	-0.0568636	0.373537	-0.102687	0.107413	-0.00661799	0.917579	0.000814608	0.989837	0.00803283	0.900043	0.0486426	0.446627	0.0191123	0.765033	0.00616142	0.923247
joint2	Neck	Y	The kurtosis of amplitudes	-0.0128589	0.840638	0.0644516	0.313048	0.160024	0.0117864	-0.190389	0.00265968	0.286924	4.5786e-06	0.29162	3.13703e-06	0.0125822	0.844024	-0.0218028	0.733134	0.202469	0.00137853	-0.0443226	0.488064	-0.0967083	0.129586	0.00717063	0.910724	-0.011679	0.855092	-0.00740277	0.907847	0.0546151	0.392757	0.0181746	0.776249	0.00288012	0.964079
joint2	Neck	Z	Direct current component	0.128652	0.043376	-0.0733216	0.250952	0.631199	7.38313e-29	-0.051421	0.421064	-0.115298	0.0704672	-0.350592	1.48924e-08	-0.0354266	0.579495	0.102676	0.107453	-0.0448232	0.483159	-0.0686145	0.282752	0.0189185	0.767348	-0.00957696	0.880959	0.0141263	0.825172	0.0461039	0.470732	-0.036223	0.570995	0.0966919	0.129652	0.00994995	0.876359
joint2	Neck	Z	The mean of phases	-0.047852	0.454057	-0.116573	0.0673936	0.285116	5.28658e-06	0.342562	3.30379e-08	-0.137279	0.0310222	0.310845	6.21007e-07	0.262467	2.94668e-05	0.45671	3.93934e-14	0.0549831	0.389572	0.00522337	0.934905	-0.0458279	0.473395	-0.0394748	0.536912	0.0433338	0.49783	0.00153755	0.980819	-0.00741623	0.90768	0.0108349	0.865462	0.000449668	0.99439
joint2	Neck	Z	The variance of phases	-0.0976147	0.126014	-0.0643122	0.314097	0.285847	4.98884e-06	0.301658	1.36632e-06	-0.13197	0.038208	0.271574	1.5041e-05	0.304292	1.09283e-06	0.436793	6.26751e-13	0.0372636	0.559977	0.0269073	0.673892	-0.0221589	0.728944	-0.0298124	0.641025	0.0555705	0.384518	-0.0140243	0.826415	-0.0229633	0.71951	0.0104399	0.870323	-0.00175849	0.978064
joint2	Neck	Z	The standard deviation of phases	-0.118683	0.0625503	-0.0768536	0.228782	0.27614	1.06376e-05	0.311661	5.78256e-07	-0.126705	0.0466746	0.288983	3.88232e-06	0.286819	4.61725e-06	0.439209	4.52361e-13	0.0329075	0.606764	0.0343738	0.590821	-0.0349222	0.584909	-0.0589105	0.356551	0.062028	0.33163	-0.0166265	0.794865	-0.0202624	0.751346	0.0253771	0.691461	-0.00525117	0.934559
joint2	Neck	Z	The skewness of phases	-0.152393	0.0165336	0.0524524	0.411796	0.237772	0.000161834	0.186338	0.00328783	-0.082033	0.198836	0.139826	0.0280062	0.298545	1.77391e-06	0.309426	7.02693e-07	-0.0385214	0.546799	0.0352011	0.581912	-0.00577795	0.928011	-0.00441634	0.944945	0.0410254	0.521027	-0.0129722	0.839253	-0.0492787	0.440698	0.0320279	0.616418	0.000718973	0.99103
joint2	Neck	Z	The kurtosis of phases	-0.111633	0.0799412	0.0912537	0.152753	0.227806	0.000306587	0.163663	0.0099801	-0.0607778	0.341486	0.0972899	0.127285	0.300915	1.45451e-06	0.268891	1.83839e-05	-0.0326586	0.609489	0.0218238	0.732886	0.00514088	0.93593	0.0230668	0.718299	0.0285341	0.655406	-0.00202002	0.974802	-0.0523178	0.412999	0.0239739	0.707719	-0.00487518	0.939235
joint2	Neck	Z	The mean of amplitudes	0.478148	1.6277e-15	-0.123076	0.0533796	0.173222	0.00634772	0.0759524	0.234302	-0.300138	1.55263e-06	0.138157	0.0299524	0.100044	0.116818	0.393473	1.42593e-10	0.211994	0.000799278	-0.0508741	0.426027	-0.0107913	0.865999	0.212446	0.000778435	-0.00272066	0.966067	0.0143222	0.822788	-0.000812488	0.989864	-0.00736119	0.908362	-0.0161277	0.800888
joint2	Neck	Z	The variance of amplitudes	0.452373	7.30764e-14	0.0275427	0.666648	0.054384	0.394766	-0.12194	0.0556385	-0.285558	5.10453e-06	0.0179964	0.778386	-0.0176243	0.782852	0.119704	0.0603117	0.245889	9.42359e-05	-0.0647776	0.310601	0.018311	0.774615	0.243921	0.000107624	-0.00190107	0.976285	0.041029	0.520989	-0.025478	0.690297	-0.0122444	0.84816	0.00950644	0.881829
joint2	Neck	Z	The standard deviation of amplitudes	0.4063	3.09801e-11	0.0212318	0.739868	0.0405799	0.525566	-0.131711	0.038591	-0.259554	3.63525e-05	-0.00183913	0.977058	-0.0352673	0.581202	0.108062	0.0901372	0.251626	6.35867e-05	-0.0433751	0.49742	-0.0108493	0.865285	0.208634	0.000971366	-0.00313247	0.960934	-0.00293692	0.963371	-0.0187335	0.769559	-0.00680864	0.915214	0.0232949	0.715634
joint2	Neck	Z	The skewness of amplitudes	-0.27425	1.22871e-05	0.293237	2.74971e-06	-0.102531	0.107954	-0.0946925	0.13781	0.0129657	0.839333	-0.0175727	0.783473	-0.171196	0.00699979	-0.445831	1.8259e-13	0.0528257	0.408471	-0.0945563	0.13838	-0.205443	0.0011658	-0.109183	0.0868294	0.0183157	0.774558	0.00420342	0.947595	-0.0401433	0.530034	0.0428488	0.502658	0.0187493	0.76937
joint2	Neck	Z	The kurtosis of amplitudes	-0.208594	0.000973629	0.308252	7.7796e-07	-0.0856495	0.179685	-0.0758444	0.23497	-0.00876572	0.890977	-0.00901535	0.887893	-0.161844	0.01085	-0.449339	1.12027e-13	0.0595308	0.351502	-0.123923	0.0517479	-0.217518	0.000576279	-0.0900553	0.158239	-0.00984523	0.87765	0.0137072	0.830279	-0.0294074	0.645568	0.0549461	0.389891	0.000371574	0.995364
joint4	ShoulderLeft	X	Direct current component	-0.396339	1.01955e-10	-0.175592	0.00565448	0.074218	0.245189	-0.0655266	0.305028	-0.228691	0.000290004	0.0718784	0.260426	-0.10126	0.112416	-0.11832	0.0633619	0.0184843	0.77254	0.0623391	0.329205	0.00724513	0.909801	0.0798565	0.211053	-0.0194732	0.760731	-0.0115952	0.856121	-0.0626734	0.326614	0.00660248	0.917772	-0.0406333	0.52502
joint4	ShoulderLeft	X	The mean of phases	0.169439	0.00761323	-0.151979	0.0168339	0.0746324	0.242556	0.257199	4.30017e-05	0.332453	8.72777e-08	-0.0161998	0.800017	0.139906	0.0279157	-0.0219551	0.73134	0.00623651	0.922315	0.133713	0.0357076	0.0103083	0.871944	0.0438941	0.492284	0.206862	0.00107533	-0.00512899	0.936078	0.112089	0.0787083	0.00512574	0.936119	0.00578996	0.927862
joint4	ShoulderLeft	X	The variance of phases	0.0248455	0.697604	-0.135389	0.033436	0.0336254	0.598934	0.163456	0.010076	0.245551	9.64181e-05	-0.0246481	0.69989	0.118439	0.0630948	0.00263512	0.967133	-0.0427257	0.503887	0.102573	0.107806	-0.000979969	0.987774	0.0404263	0.527135	0.196515	0.00191491	-0.0183302	0.774385	0.119822	0.0600563	-0.0382382	0.549753	-0.00121487	0.984844
joint4	ShoulderLeft	X	The standard deviation of phases	0.0134951	0.832867	-0.175088	0.00579587	0.0375552	0.556909	0.168327	0.00802561	0.241284	0.000128362	-0.00801897	0.900214	0.102208	0.109073	0.0216599	0.734817	-0.0459227	0.47248	0.112733	0.0769945	-0.00814941	0.8986	0.0379022	0.553267	0.20342	0.00130696	-0.0353316	0.580513	0.134798	0.0342215	-0.0378097	0.554237	0.00131549	0.983589
joint4	ShoulderLeft	X	The skewness of phases	-0.125558	0.0487133	-0.05562	0.384095	0.0435997	0.495194	0.0741216	0.245804	0.111121	0.0813431	-0.0395509	0.536127	0.114954	0.0713152	0.0463674	0.468198	-0.0474641	0.457729	0.0598989	0.348526	-0.000637089	0.992052	0.0409373	0.521923	0.122153	0.0552078	-0.0260038	0.684245	0.083527	0.190752	-0.060938	0.340213	0.00235289	0.970652
joint4	ShoulderLeft	X	The kurtosis of phases	-0.0901985	0.157576	0.00747474	0.906955	0.051684	0.418689	0.0791958	0.214866	0.120468	0.0586796	-0.063066	0.323586	0.131163	0.0394143	0.0273618	0.668707	-0.042447	0.506676	0.0524362	0.41194	0.00707913	0.911859	0.0496013	0.437708	0.0949075	0.136914	-0.00550424	0.931413	0.0614307	0.336316	-0.0520737	0.415185	-0.00219338	0.97264
joint4	ShoulderLeft	X	The mean of amplitudes	0.56467	3.33797e-22	-0.184108	0.00368816	-0.292657	2.88302e-06	-0.222403	0.000428604	0.0509845	0.425022	-0.132815	0.0369772	0.0491041	0.442321	0.064656	0.311513	-0.079224	0.214703	-0.00523178	0.9348	-0.015512	0.808339	-0.0138026	0.829117	0.00787945	0.901942	0.0240245	0.707129	0.103145	0.105847	0.0263292	0.680509	0.0518919	0.416817
joint4	ShoulderLeft	X	The variance of amplitudes	0.310126	6.61188e-07	-0.0349872	0.58421	-0.343504	3.01228e-08	-0.42576	2.69025e-12	-0.112795	0.0768324	-0.0932405	0.143977	-0.0680086	0.287034	0.235762	0.000184506	-0.0629018	0.32485	-0.185206	0.00348592	0.0644306	0.313206	-0.0521691	0.414329	-0.0346606	0.587726	0.0305138	0.633191	0.099156	0.120116	0.00475728	0.940702	-0.0127831	0.841566
joint4	ShoulderLeft	X	The standard deviation of amplitudes	0.280254	7.74412e-06	-0.11575	0.069364	-0.349107	1.72872e-08	-0.485411	5.2532e-16	-0.150725	0.0177704	-0.0993181	0.119508	-0.0565591	0.376105	0.145491	0.0221867	-0.101003	0.113335	-0.105818	0.0970587	-0.0207806	0.745203	-0.0670546	0.293865	-0.0470529	0.461639	0.0269884	0.672965	0.0753537	0.238021	0.0142499	0.823667	0.0119994	0.851162
joint4	ShoulderLeft	X	The skewness of amplitudes	-0.365716	3.12198e-09	-0.0702597	0.271343	-0.118712	0.0624852	-0.41712	8.11779e-12	-0.0570712	0.371791	-0.0256701	0.688084	-0.147078	0.0207572	0.0214683	0.737076	-0.166579	0.00871427	0.0222482	0.727895	-0.0721394	0.258695	-0.0300513	0.638352	0.102624	0.107631	0.0118796	0.852631	0.0178798	0.779784	-0.0366895	0.566043	-0.0735758	0.249308
joint4	ShoulderLeft	X	The kurtosis of amplitudes	-0.367724	2.52151e-09	-0.0565812	0.375918	-0.0983118	0.123319	-0.429699	1.60894e-12	-0.0422718	0.508433	-0.0227001	0.722593	-0.141313	0.0263643	0.0194476	0.761036	-0.163418	0.0100938	0.0333583	0.601843	-0.0685541	0.283177	-0.0316057	0.621075	0.094782	0.137436	0.0263392	0.680395	0.0101401	0.874016	-0.0403491	0.527925	-0.0631035	0.323298
joint4	ShoulderLeft	Y	Direct current component	-0.27299	1.35179e-05	0.0096645	0.879879	-0.00279623	0.965125	-0.212686	0.000767559	-0.0512931	0.422221	-0.0727466	0.254698	0.105025	0.099603	0.00779757	0.902956	0.0083683	0.895891	0.0686223	0.282697	0.00684678	0.914741	0.064553	0.312285	-0.0188836	0.767765	-0.0299152	0.639874	0.0251499	0.694083	-7.76014e-05	0.999032	0.0435428	0.495757
joint4	ShoulderLeft	Y	The mean of phases	0.200758	0.00151649	-0.0187886	0.7689	0.0605433	0.343356	0.188188	0.0029859	-0.18974	0.00275234	0.196615	0.00190454	0.09877	0.121573	-0.0665674	0.297394	0.0476272	0.456183	0.0403156	0.528268	0.097375	0.126951	0.00284542	0.964512	-0.125394	0.0490109	-0.00319799	0.960118	0.129758	0.0415919	0.03715	0.561175	0.0231308	0.717551
joint4	ShoulderLeft	Y	The variance of phases	0.0114215	0.858253	0.0483746	0.449137	0.0809911	0.204618	0.0635532	0.319855	-0.100122	0.116529	0.185595	0.00341669	0.0807132	0.206181	-0.0668001	0.295705	0.0901848	0.157639	0.0363856	0.569266	0.0626459	0.326826	-0.0194405	0.76112	-0.167328	0.0084129	0.014686	0.818364	0.0606975	0.342126	0.063868	0.317459	0.0352295	0.581608
joint4	ShoulderLeft	Y	The standard deviation of phases	-0.0100927	0.8746	0.0482604	0.45021	0.0726593	0.25527	0.0619527	0.332218	-0.091459	0.151828	0.191262	0.00253958	0.0776561	0.223944	-0.0619517	0.332226	0.0928897	0.145498	0.0325802	0.610348	0.0563781	0.377637	-0.0246392	0.699993	-0.17212	0.00669558	0.0040028	0.950093	0.0663422	0.299035	0.0614841	0.335895	0.04819	0.450872
joint4	ShoulderLeft	Y	The skewness of phases	-0.21238	0.000781455	0.125222	0.0493246	0.0676859	0.289332	-0.056149	0.379581	0.0124936	0.845108	0.0426395	0.504749	0.0718733	0.26046	-0.0481926	0.450847	0.0587891	0.357545	0.017724	0.781654	0.0384293	0.547758	0.00857958	0.893278	-0.15305	0.016068	-0.00350517	0.956291	-0.028519	0.655577	0.0422697	0.508454	0.0270213	0.67259
joint4	ShoulderLeft	Y	The kurtosis of phases	-0.143722	0.02388	0.138411	0.029649	0.0841207	0.187607	-0.0322724	0.613727	0.00463642	0.942206	0.0232269	0.716429	0.101658	0.111	-0.0466978	0.46503	0.0495133	0.438522	0.0132977	0.835277	0.0399556	0.53196	0.0269051	0.673917	-0.130672	0.0401631	0.0125026	0.844998	-0.0215415	0.736213	0.0294059	0.645584	0.00883304	0.890145
joint4	ShoulderLeft	Y	The mean of amplitudes	0.56924	1.29959e-22	0.206536	0.00109552	-0.00792066	0.901431	-0.123031	0.0534684	-0.0326589	0.609485	0.239301	0.000146365	-0.196359	0.00193117	0.247826	8.26035e-05	-0.0378626	0.553682	-0.155027	0.0147346	0.0585491	0.359515	0.00223163	0.972163	0.0101161	0.874311	0.00196371	0.975504	0.0146852	0.818374	0.0174958	0.784397	0.0155751	0.807575
joint4	ShoulderLeft	Y	The variance of amplitudes	0.326184	1.56688e-07	0.26263	2.91217e-05	-0.119871	0.0599504	-0.14331	0.0242907	0.124254	0.0511201	0.0735741	0.249319	-0.213714	0.000722539	0.361449	4.89222e-09	-0.0350916	0.583089	-0.246522	9.02752e-05	0.209046	0.000948593	0.0130188	0.838684	-0.0210591	0.741908	0.00789161	0.901791	0.0194623	0.76086	-0.0019885	0.975195	0.0011853	0.985213
joint4	ShoulderLeft	Y	The standard deviation of amplitudes	0.462734	1.6455e-14	0.254862	5.07229e-05	-0.0228605	0.720714	-0.167033	0.00853069	0.0717842	0.261053	0.211501	0.000822633	-0.221337	0.00045747	0.270592	1.61918e-05	-0.0384785	0.547246	-0.181102	0.00429747	0.044378	0.487519	-0.027991	0.661555	-0.00989463	0.877041	0.0132913	0.835355	-0.0141294	0.825135	0.02896	0.6506	0.0112877	0.859897
joint4	ShoulderLeft	Y	The skewness of amplitudes	-0.18229	0.00404657	0.0594366	0.352265	0.0674404	0.291089	-0.214456	0.00069157	0.0964679	0.130547	0.146871	0.0209392	-0.0713394	0.264028	-0.0618951	0.332668	0.0714474	0.263303	-0.070529	0.269505	-0.0910905	0.153492	-0.152295	0.0166045	-0.0640312	0.316221	0.157158	0.0134066	-0.0448303	0.483089	0.0533309	0.403997	-0.0955684	0.134189
joint4	ShoulderLeft	Y	The kurtosis of amplitudes	-0.129864	0.0414237	0.0606332	0.342638	0.0766481	0.230032	-0.197398	0.00182484	0.0632304	0.322324	0.150195	0.0181798	-0.0580191	0.363888	-0.0683661	0.284502	0.0541576	0.39674	-0.0817574	0.200353	-0.0708696	0.267194	-0.150433	0.0179946	-0.0649429	0.309365	0.153722	0.0156031	-0.0167358	0.793547	0.028974	0.650442	-0.105709	0.0974049
joint4	ShoulderLeft	Z	Direct current component	0.274109	1.24185e-05	-0.111613	0.0799951	0.290016	3.57207e-06	-0.16247	0.0105436	0.0861885	0.176952	-0.247778	8.28717e-05	0.171351	0.00694787	0.0982839	0.123426	-0.0896282	0.160229	-0.095192	0.135735	0.0133723	0.834365	-0.0143403	0.822567	-0.0102614	0.872521	-0.0608565	0.340861	-0.048369	0.449191	0.110504	0.0830599	-0.0412705	0.518537
joint4	ShoulderLeft	Z	The mean of phases	-0.0178252	0.78044	-0.126482	0.047064	-0.139555	0.0283154	0.243955	0.000107376	0.0385622	0.546373	0.133404	0.03614	-0.272525	1.40007e-05	0.026447	0.679159	-0.0518844	0.416885	0.0447186	0.484182	0.0360446	0.572894	0.089519	0.160741	-0.0356401	0.57721	-0.0762885	0.232232	-0.0234719	0.713567	-0.018735	0.76954	-0.0185313	0.771977
joint4	ShoulderLeft	Z	The variance of phases	-0.086795	0.173913	-0.133918	0.0354228	-0.1467	0.0210896	0.195402	0.00203415	-0.00208641	0.973974	0.0616071	0.334927	-0.231383	0.000244525	-0.0560941	0.380048	-0.0175909	0.783253	0.0554742	0.385344	0.0982364	0.123609	0.0872767	0.171527	-0.051294	0.422213	-0.0465797	0.466161	-0.0260574	0.68363	-0.0220912	0.72974	-0.0318688	0.618172
joint4	ShoulderLeft	Z	The standard deviation of phases	-0.0681189	0.286252	-0.141223	0.0264612	-0.16309	0.0102471	0.214998	0.000669705	0.0119384	0.85191	0.0503951	0.430401	-0.241225	0.000128871	-0.0554512	0.385541	-0.0225285	0.724604	0.0593648	0.352849	0.0990999	0.120327	0.0846686	0.184739	-0.0575361	0.367902	-0.0631989	0.322565	-0.0229293	0.719908	-0.00354553	0.955788	-0.0393951	0.537736
joint4	ShoulderLeft	Z	The skewness of phases	-0.180771	0.00436995	-0.0958333	0.133108	-0.072104	0.25893	0.0346364	0.587987	-0.0385996	0.545984	-0.0465311	0.466627	-0.104518	0.101258	-0.115343	0.0703574	0.0511677	0.423358	0.0310088	0.627686	0.153583	0.0156986	0.0937441	0.141814	-0.0613965	0.336586	0.0202199	0.75185	-0.0186555	0.770492	0.000199494	0.997511	-0.0187377	0.769509
joint4	ShoulderLeft	Z	The kurtosis of phases	-0.182512	0.00400124	-0.0706289	0.268825	-0.0291514	0.648445	0.0186315	0.770779	-0.0518511	0.417184	-0.0431324	0.499831	-0.0749224	0.240726	-0.113169	0.0758531	0.0594368	0.352264	0.0145442	0.820087	0.151887	0.0169008	0.0996796	0.118162	-0.0521393	0.414596	0.0337344	0.59775	-0.0263838	0.679884	-0.0178897	0.779665	-0.0216666	0.734737
joint4	ShoulderLeft	Z	The mean of amplitudes	0.467704	7.90441e-15	-0.270431	1.63872e-05	-0.202254	0.00139523	0.220897	0.000469878	-0.163467	0.010071	0.00610356	0.923966	-0.159434	0.0121052	0.076958	0.228148	-0.0189935	0.766452	-0.0503794	0.430545	-0.0202466	0.751533	0.13677	0.0316566	-0.00650266	0.919011	-0.0342637	0.592012	-0.0228865	0.720409	0.00336406	0.958049	-0.0294391	0.645211
joint4	ShoulderLeft	Z	The variance of amplitudes	0.419806	5.77765e-12	-0.141208	0.0264781	-0.131666	0.0386588	0.116753	0.0669695	-0.280485	7.60624e-06	-0.0869978	0.172905	-0.00530346	0.933909	0.00210024	0.973802	0.0864074	0.17585	-0.0485159	0.447813	0.0474404	0.457954	0.0884355	0.165888	0.0702381	0.27149	0.0216432	0.735013	0.039089	0.540902	0.0575674	0.367641	-0.0406351	0.525002
joint4	ShoulderLeft	Z	The standard deviation of amplitudes	0.410265	1.90697e-11	-0.207687	0.0010257	-0.1581	0.0128539	0.119035	0.0617706	-0.248047	8.13637e-05	-0.10251	0.108024	-0.0277073	0.664776	0.0018163	0.977343	0.040346	0.527957	-0.0514859	0.420477	0.0409706	0.521583	0.0583236	0.361371	0.0467069	0.464943	-0.0184944	0.772418	-0.00321692	0.959882	0.0313166	0.624274	-0.0480109	0.452559
joint4	ShoulderLeft	Z	The skewness of amplitudes	-0.211854	0.00080588	0.139008	0.0289462	0.153813	0.0155412	0.00770906	0.904052	-0.13884	0.0291423	-0.0670062	0.294214	0.0535958	0.401664	-0.144772	0.0228621	0.0427299	0.503845	-0.0616396	0.334672	0.120031	0.059607	-0.0981365	0.123993	0.0633011	0.321782	-0.0761748	0.232932	-0.026749	0.675701	0.0349259	0.58487	-0.148443	0.019592
joint4	ShoulderLeft	Z	The kurtosis of amplitudes	-0.173334	0.00631358	0.140694	0.0270373	0.177307	0.00519576	0.00698788	0.91299	-0.166339	0.00881271	-0.0417426	0.51376	0.0583906	0.360819	-0.115261	0.0705581	0.0389854	0.541976	-0.0844591	0.185832	0.126556	0.0469344	-0.0604582	0.344036	0.0548642	0.390599	-0.0753397	0.238108	-0.0299275	0.639737	0.0436237	0.494956	-0.150091	0.0182609
joint5	ShoulderRight	X	Direct current component	-0.368623	2.29039e-09	-0.252758	5.8775e-05	0.043702	0.494181	-0.457952	3.29525e-14	-0.0357193	0.576364	-0.0243844	0.702948	0.132011	0.0381462	-0.160364	0.0116063	0.0794985	0.213113	0.135669	0.0330678	-0.00142899	0.982173	0.0195443	0.759884	0.0137181	0.830147	-0.0118541	0.852944	0.0392911	0.53881	-0.0108365	0.865442	-0.0151113	0.813199
joint5	ShoulderRight	X	The mean of phases	0.110765	0.0823299	-0.0726319	0.255449	-0.0480661	0.452039	0.314813	4.38101e-07	-0.112092	0.0787006	0.0148066	0.816898	-0.0298417	0.640698	-0.0624647	0.32823	0.0085814	0.893256	0.0786788	0.217885	0.0585883	0.359192	-0.205966	0.00113165	0.169106	0.00773453	0.0409513	0.52178	0.0408953	0.52235	-0.043124	0.499915	0.0346201	0.588164
joint5	ShoulderRight	X	The variance of phases	-0.0248551	0.697492	-0.0683769	0.284426	-0.0714488	0.263294	0.213864	0.000716178	-0.100227	0.116147	-0.026155	0.682508	-0.0674831	0.290783	-0.101319	0.112202	-0.0136853	0.830547	0.11788	0.0643596	0.0308252	0.629726	-0.135191	0.0336974	0.113816	0.0741807	0.0487032	0.44606	0.0559765	0.381049	-0.0586777	0.358458	0.0434078	0.497095
joint5	ShoulderRight	X	The standard deviation of phases	-0.0579309	0.364619	-0.0765817	0.230438	-0.0661902	0.300146	0.214241	0.00070041	-0.100607	0.114761	-0.0102004	0.873273	-0.0794179	0.213579	-0.0945746	0.138303	0.00690203	0.914055	0.10412	0.102572	0.0300362	0.638521	-0.14262	0.0249903	0.107269	0.0925351	0.0442419	0.488857	0.0663941	0.298656	-0.057938	0.36456	0.0389656	0.542182
joint5	ShoulderRight	X	The skewness of phases	-0.176121	0.00550907	-0.00154513	0.980725	-0.034767	0.58658	0.0870079	0.172855	-0.0499501	0.434489	-0.0549208	0.390109	-0.0329187	0.606642	-0.101505	0.111543	0.00903051	0.887705	0.0958182	0.133169	0.0227838	0.721612	-0.0221028	0.729604	0.0148284	0.816634	0.0567259	0.374697	0.0656354	0.304224	-0.0500746	0.433343	0.0487801	0.445341
joint5	ShoulderRight	X	The kurtosis of phases	-0.132502	0.0374284	0.0407804	0.52352	-0.0181794	0.776191	0.0858172	0.178831	-0.0306436	0.631746	-0.0674457	0.291051	-0.000820422	0.989765	-0.0913891	0.152142	-0.00167456	0.97911	0.0899121	0.158904	0.0304879	0.633479	-0.00702359	0.912547	0.0196741	0.758338	0.0518644	0.417064	0.0533139	0.404147	-0.0506227	0.428319	0.0417583	0.513602
joint5	ShoulderRight	X	The mean of amplitudes	0.549049	7.53669e-21	-0.122106	0.0553035	-0.153942	0.0154537	-0.23007	0.000265811	-0.28278	6.35658e-06	-0.0342269	0.59241	0.0578399	0.365374	-0.0816138	0.201147	-0.0937062	0.141976	0.067812	0.288433	0.00589241	0.926589	-0.085388	0.181022	0.03745	0.558015	0.0151818	0.812344	-0.0183107	0.774618	0.0606537	0.342475	0.0317749	0.619207
joint5	ShoulderRight	X	The variance of amplitudes	0.335886	6.29996e-08	-0.100161	0.116387	-0.145651	0.022039	-0.484945	5.65251e-16	-0.25024	6.99874e-05	-0.0541976	0.396391	0.037563	0.556827	-0.0657755	0.303191	-0.0875348	0.170259	0.0527994	0.408704	-0.0455304	0.476275	0.0699373	0.273553	-0.0217725	0.733491	0.0322992	0.613434	-0.0287712	0.652729	0.0395413	0.536226	0.0133993	0.834036
joint5	ShoulderRight	X	The standard deviation of amplitudes	0.30928	7.11654e-07	-0.118676	0.0625662	-0.175349	0.00572228	-0.540251	4.06331e-20	-0.246736	8.89698e-05	-0.0502671	0.431575	0.00385087	0.951985	-0.0543536	0.395031	-0.132206	0.03786	0.0528937	0.407868	-0.076425	0.231396	0.0296943	0.642349	-0.0454692	0.476869	0.0469363	0.462751	0.00468252	0.941632	0.0409265	0.522032	0.0252347	0.693104
joint5	ShoulderRight	X	The skewness of amplitudes	-0.410039	1.96099e-11	-0.0431579	0.499578	-0.0428371	0.502775	-0.393806	1.37157e-10	-0.0294598	0.644979	0.0159202	0.803398	-0.136406	0.0321174	-0.0338277	0.596737	-0.194971	0.00208213	0.0804812	0.207492	-0.0757893	0.235311	0.0209443	0.743266	0.159372	0.0121393	0.0739107	0.247154	0.052072	0.4152	-0.00437502	0.945459	-0.0277552	0.664232
joint5	ShoulderRight	X	The kurtosis of amplitudes	-0.415599	9.82813e-12	-0.0346141	0.588227	-0.0333369	0.602076	-0.399795	6.77429e-11	-0.0376462	0.555952	0.0249305	0.696621	-0.121226	0.0570952	-0.0215348	0.736292	-0.193308	0.00227698	0.0675813	0.29008	-0.0518099	0.417555	0.0247467	0.698748	0.161136	0.0112063	0.0827196	0.19509	0.050884	0.425937	-0.0078818	0.901912	-0.0247627	0.698563
joint5	ShoulderRight	Y	Direct current component	-0.267743	2.00185e-05	0.0378763	0.553538	-0.0600116	0.347619	-0.183178	0.0038678	-0.0372959	0.559637	-0.0496773	0.437005	0.0567079	0.374848	0.0625806	0.327332	-0.0109044	0.864608	0.00919323	0.885695	0.0689423	0.280453	0.0716372	0.262034	-0.0468083	0.463973	-0.0364325	0.568768	0.0147979	0.817004	0.000823739	0.989723	0.0455229	0.476347
joint5	ShoulderRight	Y	The mean of phases	0.147418	0.0204613	0.0431678	0.49948	-0.0710261	0.266136	0.304603	1.06425e-06	-0.0282261	0.65889	0.147035	0.0207946	0.037765	0.554706	-0.0755517	0.236787	-0.214206	0.00070186	0.0993579	0.11936	0.00667291	0.916898	0.0246384	0.700002	-0.00439109	0.945259	0.0436211	0.494982	-0.00390339	0.951331	0.158418	0.0126719	-0.0159577	0.802944
joint5	ShoulderRight	Y	The variance of phases	0.0211868	0.740399	0.0728586	0.253965	-0.0188766	0.767848	0.25641	4.54746e-05	0.0271525	0.671092	0.175411	0.00570476	0.00994681	0.876398	-0.0928971	0.145466	-0.218621	0.000539339	0.0654844	0.30534	0.0115198	0.857047	0.0378465	0.553851	-0.0127553	0.841905	0.0395717	0.535912	-0.029239	0.64746	0.110886	0.081992	-0.0186872	0.770112
joint5	ShoulderRight	Y	The standard deviation of phases	0.0253583	0.691677	0.0316778	0.620279	-0.00661631	0.9176	0.276309	1.05006e-05	0.00875844	0.891067	0.186353	0.00328523	0.00622058	0.922513	-0.0977415	0.125521	-0.219204	0.000520692	0.0599405	0.348191	0.016223	0.799736	0.0387503	0.544417	-0.00860695	0.89294	0.030692	0.631207	-0.0242938	0.704	0.12505	0.0496397	-0.0255876	0.689034
joint5	ShoulderRight	Y	The skewness of phases	-0.156807	0.0136173	0.0891469	0.162495	0.0554852	0.38525	0.125037	0.0496642	0.0585526	0.359486	0.11354	0.0748904	0.00447145	0.944259	-0.0889404	0.163474	-0.146802	0.0209995	0.0164457	0.797047	0.0397224	0.534359	0.0354041	0.579736	0.0045997	0.942663	0.0176955	0.781997	-0.0449507	0.481914	0.0309176	0.628699	-0.015283	0.811116
joint5	ShoulderRight	Y	The kurtosis of phases	-0.106298	0.0955424	0.141576	0.0260827	0.0196292	0.758873	0.133957	0.0353691	0.073997	0.246602	0.0868528	0.173625	0.0264488	0.679138	-0.0768991	0.228505	-0.147743	0.0201817	0.0226549	0.723122	0.0265083	0.678457	0.0420111	0.511054	-0.000146606	0.998171	0.0312706	0.624783	-0.0353278	0.580553	0.0290116	0.650019	-0.0121132	0.849767
joint5	ShoulderRight	Y	The mean of amplitudes	0.711598	1.97022e-39	0.0705666	0.269249	0.0583676	0.361009	0.0255327	0.689667	0.0123993	0.846263	0.248011	8.15668e-05	-0.0482564	0.450248	0.00752615	0.906318	-0.120251	0.0591395	0.0777679	0.223276	-0.20957	0.000920285	0.0596149	0.35082	0.0232106	0.716618	-0.0216199	0.735288	0.0260286	0.68396	0.0534442	0.402998	-5.8758e-05	0.999267
joint5	ShoulderRight	Y	The variance of amplitudes	0.501912	3.63227e-17	0.0886509	0.164855	0.133782	0.0356107	0.000935403	0.98833	0.0303231	0.635316	0.363167	4.08614e-09	-0.146091	0.0216365	0.0844838	0.185703	-0.0251783	0.693756	0.0133103	0.835123	-0.233608	0.000212055	0.0632818	0.32193	-0.0453888	0.47765	-0.0178587	0.780037	-0.0365741	0.567266	0.0460644	0.471113	0.0287752	0.652684
joint5	ShoulderRight	Y	The standard deviation of amplitudes	0.635393	2.47505e-29	0.0532468	0.40474	0.125013	0.0497079	-0.0371789	0.56087	0.0602027	0.346083	0.304483	1.07521e-06	-0.090832	0.154667	0.0485297	0.447683	-0.053507	0.402445	0.00693588	0.913635	-0.203972	0.00126691	0.0587026	0.358254	-0.00851238	0.894109	0.000505459	0.993694	0.0181061	0.77707	0.0218113	0.733034	0.0126129	0.843648
joint5	ShoulderRight	Y	The skewness of amplitudes	-0.11238	0.0779303	-0.0206558	0.746681	0.035953	0.57387	-0.00718317	0.910569	0.120777	0.0580301	0.193062	0.00230724	-0.0865403	0.175184	-0.0365463	0.567561	0.020978	0.742867	-0.0878163	0.168883	0.00223645	0.972103	0.114329	0.0728783	-0.103721	0.103902	-0.00595282	0.925838	-0.0888438	0.163934	0.00811431	0.899034	-0.0415861	0.515341
joint5	ShoulderRight	Y	The kurtosis of amplitudes	-0.06816	0.28596	-0.00139693	0.982573	0.0262962	0.680888	0.0228984	0.72027	0.118545	0.0628586	0.195709	0.00200065	-0.0816855	0.200751	-0.0453721	0.477811	0.00916772	0.88601	-0.0754692	0.2373	-0.00527786	0.934227	0.133275	0.0363219	-0.109249	0.0866389	-0.00322529	0.959778	-0.096335	0.13108	0.0170161	0.790168	-0.0451207	0.480257
joint5	ShoulderRight	Z	Direct current component	0.20243	0.00138156	-0.04994	0.434582	0.614936	4.38537e-27	-0.122271	0.0549719	-0.0399062	0.532468	-0.276184	1.06019e-05	0.0155753	0.807573	0.141	0.0267032	-0.11171	0.0797327	0.0263721	0.680017	0.0390909	0.540883	0.0327265	0.608745	-0.00667655	0.916853	0.121643	0.0562398	-0.0380935	0.551265	0.10712	0.0929924	0.0216048	0.735467
joint5	ShoulderRight	Z	The mean of phases	0.0861016	0.17739	-0.217004	0.000594296	-0.0910814	0.153533	0.014812	0.816832	0.133723	0.0356938	0.000518439	0.993532	0.134667	0.034398	0.156714	0.0136742	0.180942	0.00433245	0.100714	0.114374	-0.0652865	0.306808	-0.00749213	0.906739	0.00114848	0.985672	-0.0363144	0.570022	0.026331	0.680489	0.0191012	0.765166	-0.0235848	0.712251
joint5	ShoulderRight	Z	The variance of phases	-0.0111002	0.8622	-0.202302	0.00139149	-0.194598	0.00212448	-0.00534666	0.933372	0.0996631	0.118223	-0.0565391	0.376274	0.109718	0.0852848	0.0758565	0.234895	0.127421	0.0454368	0.0884812	0.165668	-0.0212242	0.739957	-0.0279749	0.661738	0.00413544	0.948441	-0.0235493	0.712664	0.0236914	0.711007	-0.0245688	0.700809	-0.00660028	0.917799
joint5	ShoulderRight	Z	The standard deviation of phases	-0.0256892	0.687864	-0.21975	0.000503783	-0.199886	0.0015916	-0.00719457	0.910427	0.0934633	0.143017	-0.0406147	0.52521	0.123212	0.0531162	0.066025	0.301356	0.127557	0.0452062	0.0833135	0.191892	-0.0270135	0.672679	-0.0275036	0.667092	0.00756032	0.905894	-0.0336066	0.599139	0.00827887	0.896998	-0.0261077	0.683051	-0.00865433	0.892354
joint5	ShoulderRight	Z	The skewness of phases	-0.155676	0.0143182	-0.0497387	0.436438	-0.14719	0.0206595	-0.00224278	0.972025	0.029863	0.640459	-0.0933653	0.143439	0.0990892	0.120367	-0.0210591	0.741908	0.0250389	0.695366	0.0294979	0.644551	0.02174	0.733874	0.00401321	0.949963	-0.00275965	0.965581	-0.0091176	0.88663	-0.0109265	0.864335	-0.0560741	0.380218	0.0038875	0.951529
joint5	ShoulderRight	Z	The kurtosis of phases	-0.128105	0.0442819	-0.000349322	0.995642	-0.110381	0.0834052	0.00460737	0.942567	0.0452257	0.479235	-0.10678	0.0940394	0.113965	0.0738012	-0.00670642	0.916482	0.0290841	0.649203	0.032299	0.613436	0.0253043	0.692301	0.0223857	0.72628	-0.0107818	0.866116	0.00741983	0.907635	-0.00620433	0.922714	-0.0482488	0.450319	-0.000831726	0.989624
joint5	ShoulderRight	Z	The mean of amplitudes	0.446353	1.69852e-13	-0.394729	1.23147e-10	-0.370088	1.95713e-09	-0.0612087	0.338068	-0.103922	0.103229	-0.0446534	0.484819	-0.0302049	0.636636	0.151922	0.0168753	0.0582181	0.362242	0.046474	0.467175	0.00962452	0.880372	0.145666	0.0220255	0.0189863	0.766538	-0.0134673	0.833206	-0.0257329	0.687361	0.00230127	0.971295	0.0163581	0.798104
joint5	ShoulderRight	Z	The variance of amplitudes	0.330797	1.01996e-07	-0.310267	6.53137e-07	-0.383411	4.5143e-10	-0.0363519	0.569625	-0.253731	5.49113e-05	-0.051652	0.418978	-0.110743	0.0823915	0.0689428	0.28045	-0.0300617	0.638236	-0.0413163	0.518072	0.0481081	0.451643	0.157625	0.01313	0.0145566	0.819937	-0.000970679	0.98789	-0.0204333	0.749318	-0.024519	0.701386	0.0433671	0.4975
joint5	ShoulderRight	Z	The standard deviation of amplitudes	0.319414	2.90474e-07	-0.32056	2.61945e-07	-0.415731	9.66689e-12	-0.0399734	0.531778	-0.209169	0.00094187	-0.0596944	0.350178	-0.121904	0.0557105	0.0352237	0.58167	-0.0530142	0.406799	-0.0213562	0.738399	0.0400434	0.531059	0.126207	0.0475505	0.0233202	0.715338	-0.0102799	0.872293	-0.0337404	0.597685	-0.0179433	0.779023	0.057114	0.371432
joint5	ShoulderRight	Z	The skewness of amplitudes	-0.209153	0.000942765	-0.0202061	0.752014	-0.153424	0.0158079	0.00724566	0.909794	-0.0765217	0.230804	-0.0804083	0.207906	0.0234027	0.714375	-0.0916156	0.151125	-0.144262	0.0233521	-0.154586	0.0150233	0.0315181	0.622044	-0.0623136	0.329404	-0.00459976	0.942662	0.166182	0.00887763	-0.0107094	0.867006	0.0320679	0.615978	0.0229346	0.719846
joint5	ShoulderRight	Z	The kurtosis of amplitudes	-0.161177	0.0111855	-0.0491421	0.441967	-0.123238	0.0530644	-0.0084232	0.895212	-0.0780713	0.22147	-0.0829871	0.193645	0.057111	0.371458	-0.0571292	0.371304	-0.127084	0.0460164	-0.163282	0.0101573	0.0509668	0.425183	-0.0527489	0.409154	-0.0129763	0.839203	0.162498	0.01053	-0.0183881	0.773691	0.0405968	0.525394	0.0218733	0.732303
joint6	SpineMid	X	Direct current component	-0.0328527	0.607363	-0.266547	2.18671e-05	-0.272262	1.42817e-05	-0.0319175	0.617634	0.0382503	0.549626	0.090721	0.155173	0.0467359	0.464665	-0.098796	0.121474	0.194007	0.00219312	0.0892441	0.162036	-0.0394329	0.537345	0.0104076	0.870721	-0.108167	0.0898224	0.221426	0.000454971	-0.187202	0.0031436	-0.0460414	0.471335	0.0328873	0.606985
joint6	SpineMid	X	The mean of phases	0.199846	0.00159513	-0.216864	0.000599321	0.0467769	0.464274	0.29064	3.3966e-06	0.182377	0.00402869	-0.184742	0.00357006	0.203283	0.00131702	-0.106125	0.0960873	-0.0313045	0.624408	-0.039886	0.532676	0.0209273	0.743467	-0.158928	0.0123843	0.00837423	0.895818	-0.0302315	0.63634	0.0382586	0.54954	0.0458552	0.473132	-0.00398621	0.9503
joint6	SpineMid	X	The variance of phases	0.0281267	0.660016	-0.1461	0.0216282	-0.00158495	0.980228	0.190495	0.00264488	0.155989	0.0141212	-0.20764	0.00102849	0.149246	0.0189329	-0.117589	0.0650247	-0.0644943	0.312726	-0.0492298	0.441152	-0.0283866	0.657074	-0.136649	0.0318096	-0.00469656	0.941457	-0.024004	0.707368	-0.00351832	0.956127	0.0116046	0.856005	0.00500195	0.937658
joint6	SpineMid	X	The standard deviation of phases	0.0214512	0.737278	-0.190979	0.00257798	-0.00207488	0.974118	0.182293	0.00404607	0.128891	0.0429851	-0.190628	0.0026263	0.142635	0.0249746	-0.126984	0.0461889	-0.0614002	0.336556	-0.0690184	0.279921	-0.037533	0.557142	-0.168558	0.00793824	0.000388688	0.995151	-0.0307629	0.630418	-0.00261151	0.967427	0.00337915	0.957861	-0.0157481	0.805481
joint6	SpineMid	X	The skewness of phases	-0.093081	0.144667	-0.0650292	0.308721	0.00636142	0.920764	0.099443	0.119042	0.0975561	0.126243	-0.184238	0.00366372	0.144986	0.0226594	-0.104543	0.101175	-0.0522504	0.413601	-0.0677978	0.288534	-0.0361009	0.572294	-0.0780686	0.221486	-0.0236292	0.711733	-0.00551129	0.931325	-0.0314666	0.622613	-0.00951514	0.881722	0.00695778	0.913364
joint6	SpineMid	X	The kurtosis of phases	-0.0713461	0.263982	0.00352579	0.956034	0.0216446	0.734997	0.105031	0.0995837	0.119635	0.060461	-0.191137	0.00255652	0.165786	0.00904348	-0.0859327	0.178245	-0.0513275	0.421909	-0.0530901	0.406126	-0.0297837	0.641347	-0.0402293	0.529152	-0.0263152	0.68067	8.96488e-05	0.998882	-0.0315036	0.622204	-0.0060164	0.925049	0.00904023	0.887585
joint6	SpineMid	X	The mean of amplitudes	0.46324	1.52807e-14	-0.215762	0.000640027	-0.178696	0.00484905	-0.333455	7.93932e-08	-0.195035	0.00207495	-0.106749	0.0941365	0.0439197	0.492031	0.0328363	0.607543	-0.0619782	0.332019	-0.0998369	0.11758	-0.0414816	0.516399	-0.110375	0.0834218	-0.148282	0.0197261	0.0135104	0.83268	-0.0607061	0.342057	0.000268399	0.996651	-0.0311474	0.626148
joint6	SpineMid	X	The variance of amplitudes	0.0667969	0.295728	-0.0786567	0.218014	-0.186607	0.00324219	-0.537524	6.78233e-20	-0.266932	2.12553e-05	-0.0428308	0.502838	-0.0598276	0.349101	0.0769891	0.22796	-0.09926	0.119726	-0.107869	0.0907152	-0.116624	0.067274	-0.0713723	0.263807	-0.110196	0.0839265	-0.00583676	0.92728	-0.0182215	0.775687	-0.0440597	0.490651	-0.0280919	0.66041
joint6	SpineMid	X	The standard deviation of amplitudes	0.0609584	0.340051	-0.0819481	0.199302	-0.198147	0.00175153	-0.564221	3.65941e-22	-0.27026	1.65984e-05	-0.0421199	0.50996	-0.115189	0.0707355	0.0722967	0.257655	-0.118597	0.0627421	-0.0621141	0.330957	-0.138404	0.0296571	-0.056054	0.380389	-0.0997543	0.117885	0.0102523	0.872633	-0.0511711	0.423327	-0.0320246	0.616454	-0.00360364	0.955064
joint6	SpineMid	X	The skewness of amplitudes	-0.397758	8.62544e-11	0.0218942	0.732057	-0.0967674	0.129351	-0.328723	1.23828e-07	-0.110644	0.0826664	-0.0267351	0.67586	-0.243244	0.000112626	0.0195747	0.759521	-0.176956	0.00528689	0.0746467	0.242466	-0.200693	0.00152199	0.0226655	0.722998	0.154425	0.0151301	-0.0337527	0.597551	-0.00543345	0.932293	0.000940722	0.988264	0.0533567	0.40377
joint6	SpineMid	X	The kurtosis of amplitudes	-0.39199	1.69405e-10	0.018129	0.776796	-0.0839707	0.188398	-0.33405	7.50366e-08	-0.106132	0.0960655	-0.0249597	0.696283	-0.222151	0.000435258	0.0256816	0.687951	-0.187071	0.00316509	0.0702836	0.271179	-0.192192	0.00241704	0.0369771	0.563	0.152081	0.0167594	-0.0260591	0.683609	-0.000957768	0.988051	0.00604548	0.924687	0.0544383	0.394293
joint6	SpineMid	Y	Direct current component	-0.276951	9.99597e-06	-0.0292393	0.647456	-0.016114	0.801054	-0.207815	0.0010182	-0.0684784	0.28371	-0.0413462	0.517769	0.109125	0.0869991	0.000820736	0.989761	0.0266521	0.67681	0.0409182	0.522117	0.0354245	0.579517	0.0437037	0.494165	-0.00224136	0.972042	-0.044121	0.490047	0.0183596	0.774032	0.0224741	0.725243	0.0449885	0.481545
joint6	SpineMid	Y	The mean of phases	-0.192891	0.00232839	-0.148932	0.0191882	0.0372314	0.560317	0.18704	0.00317023	-0.105515	0.0980228	-0.020348	0.75033	-0.0146819	0.818413	-0.0446686	0.484671	-0.124929	0.0498632	0.152788	0.0162521	0.101723	0.110772	0.113895	0.0739785	-0.109301	0.0864883	0.0303342	0.635193	-0.0137656	0.829567	0.0107989	0.865905	-0.024215	0.704915
joint6	SpineMid	Y	The variance of phases	-0.264362	2.56707e-05	-0.0310717	0.626988	0.0728506	0.254017	0.0646302	0.311706	0.0190237	0.766092	-0.00319025	0.960214	-0.00924627	0.885041	-0.0339057	0.59589	-0.0615531	0.335352	0.0926939	0.146352	0.05017	0.432466	0.127838	0.0447298	-0.0589549	0.356189	0.0560883	0.380097	-0.0390814	0.540981	0.0219917	0.73091	-0.00304218	0.96206
joint6	SpineMid	Y	The standard deviation of phases	-0.274886	1.17065e-05	-0.0667855	0.29581	0.0580586	0.363561	0.0732582	0.251363	0.0150428	0.81403	0.0234737	0.713547	-0.0356223	0.5774	-0.0305472	0.632819	-0.0541805	0.39654	0.0906574	0.155465	0.0486611	0.446453	0.133427	0.0361083	-0.0665379	0.297609	0.0593754	0.352762	-0.0303906	0.634564	0.0295153	0.644356	-0.00219327	0.972642
joint6	SpineMid	Y	The skewness of phases	-0.228285	0.0002975	0.11258	0.0773998	0.071057	0.265927	-0.0311492	0.626128	0.0829358	0.193922	-0.0134206	0.833776	0.0188813	0.767793	-0.02318	0.716976	-0.00381389	0.952445	0.0112372	0.860517	0.0197488	0.757449	0.132726	0.0371055	-0.0251192	0.694439	0.0599809	0.347865	-0.0374769	0.557732	0.0282535	0.65858	0.00791152	0.901544
joint6	SpineMid	Y	The kurtosis of phases	-0.195819	0.00198875	0.129951	0.0412865	0.0809841	0.204657	-0.000228279	0.997152	0.074289	0.244737	-0.0433573	0.497597	0.04982	0.435688	-0.0266858	0.676424	-0.0190193	0.766144	0.0252319	0.693137	0.0240327	0.707034	0.127966	0.0445152	-0.0362771	0.570419	0.0566767	0.375112	-0.0405595	0.525774	0.0159443	0.803106	-0.000181385	0.997737
joint6	SpineMid	Y	The mean of amplitudes	0.697903	2.20589e-37	-0.085616	0.179855	0.0691809	0.278788	-0.0380151	0.552085	-0.195835	0.001987	0.288251	4.11745e-06	-0.00730441	0.909066	0.00390435	0.951319	-0.139718	0.0281288	0.14778	0.0201503	-0.182247	0.00405553	-0.00594928	0.925882	0.0780034	0.221873	-0.00641644	0.920081	0.0733169	0.250983	-0.0113835	0.858719	-0.0304975	0.633372
joint6	SpineMid	Y	The variance of amplitudes	0.609065	1.8086e-26	0.0529024	0.40779	0.157188	0.0133884	-0.0608339	0.34104	-0.0628421	0.325311	0.424691	3.08939e-12	-0.0940625	0.14046	0.0446353	0.484997	-0.0802424	0.208848	0.077851	0.22278	-0.217738	0.000568727	-0.00283977	0.964582	0.0598571	0.348863	-0.00650851	0.918938	0.0393414	0.53829	-0.0282591	0.658516	-0.0219105	0.731865
joint6	SpineMid	Y	The standard deviation of amplitudes	0.679944	7.26487e-35	-0.00525736	0.934482	0.113021	0.0762398	-0.0901702	0.157707	-0.063399	0.321033	0.386868	3.05182e-10	-0.0416134	0.515066	0.0357548	0.575984	-0.0624083	0.328668	0.0824328	0.196648	-0.194062	0.00218666	-0.0277548	0.664237	0.0798854	0.210887	0.00150454	0.981231	0.0608973	0.340536	0.00950701	0.881822	-0.0150631	0.813784
joint6	SpineMid	Y	The skewness of amplitudes	-0.0689859	0.280148	0.0660495	0.301176	0.107395	0.0921515	-0.207682	0.00102599	0.319226	2.95445e-07	0.249684	7.27203e-05	-0.00308584	0.961515	-0.00925642	0.884915	0.238648	0.0001528	-0.0532977	0.404291	-0.110156	0.0840393	-0.0202724	0.751227	0.00983946	0.877721	0.008084	0.899409	0.0138227	0.828871	-0.00771018	0.904038	0.0198633	0.756087
joint6	SpineMid	Y	The kurtosis of amplitudes	-0.0503854	0.430491	0.0580467	0.363659	0.133241	0.0363699	-0.208958	0.000953415	0.296746	2.06003e-06	0.27227	1.42731e-05	-0.00157028	0.980411	-0.0151465	0.812772	0.242897	0.000115272	-0.0388919	0.542947	-0.099031	0.120586	-0.00680803	0.915221	-0.000991552	0.98763	-0.00570885	0.928869	0.0220198	0.73058	-0.0029457	0.963262	0.0178793	0.779791
joint6	SpineMid	Z	Direct current component	0.13364	0.0358097	-0.0414596	0.516621	0.673068	6.00024e-34	0.00907434	0.887164	-0.118523	0.0629082	-0.324238	1.87392e-07	-0.0800477	0.209958	0.108546	0.0886964	-0.0478229	0.454333	-0.0357038	0.57653	0.0270985	0.671709	0.0131401	0.837202	0.00438176	0.945375	0.0233035	0.715534	-0.018725	0.76966	0.080295	0.208549	0.0365369	0.56766
joint6	SpineMid	Z	The mean of phases	-0.035079	0.583224	-0.129166	0.0425396	0.312571	5.33891e-07	0.335965	6.2523e-08	-0.138719	0.0292847	0.284073	5.7414e-06	0.267663	2.0137e-05	0.459207	2.7492e-14	0.0506239	0.428309	0.016744	0.793447	-0.0417811	0.513372	-0.0446443	0.484909	0.0416286	0.514912	-0.00175567	0.978099	0.00696003	0.913336	0.0110547	0.86276	-0.000605973	0.99244
joint6	SpineMid	Z	The variance of phases	-0.0839729	0.188386	-0.0779402	0.222248	0.318139	3.25739e-07	0.29226	2.97774e-06	-0.132048	0.0380917	0.243305	0.000112168	0.305743	9.65394e-07	0.434001	9.1071e-13	0.0310611	0.627105	0.0399076	0.532453	-0.0235014	0.713223	-0.0330062	0.605685	0.0599334	0.348248	-0.013987	0.82687	-0.0127413	0.842077	0.014155	0.824823	-0.00225914	0.97182
joint6	SpineMid	Z	The standard deviation of phases	-0.10054	0.115006	-0.0891232	0.162607	0.309614	6.91296e-07	0.303678	1.15145e-06	-0.122406	0.054703	0.256823	4.41652e-05	0.288227	4.12527e-06	0.436223	6.76605e-13	0.0248075	0.698043	0.0462413	0.46941	-0.0377669	0.554685	-0.0605068	0.343647	0.0689447	0.280436	-0.0155301	0.808121	-0.00762221	0.905128	0.0293531	0.646177	-0.00484346	0.93963
joint6	SpineMid	Z	The skewness of phases	-0.138299	0.0297828	0.0430573	0.500579	0.259494	3.65096e-05	0.172568	0.00655215	-0.0782157	0.220613	0.111414	0.0805388	0.291411	3.19063e-06	0.295777	2.23184e-06	-0.044802	0.483366	0.044964	0.481784	-0.00868886	0.891927	-0.00279526	0.965137	0.0492208	0.441235	-0.00957631	0.880967	-0.0395448	0.53619	0.0384303	0.547748	0.000532434	0.993357
joint6	SpineMid	Z	The kurtosis of phases	-0.0999997	0.116979	0.0826057	0.195708	0.247361	8.52659e-05	0.152983	0.0161151	-0.0578379	0.365391	0.0736383	0.248905	0.294003	2.58253e-06	0.257395	4.24092e-05	-0.0368863	0.56396	0.0310884	0.626803	0.00308356	0.961544	0.0242548	0.704453	0.0341121	0.593653	-0.00037351	0.99534	-0.0453065	0.478449	0.02913	0.648686	-0.00506241	0.936906
joint6	SpineMid	Z	The mean of amplitudes	0.490128	2.48354e-16	-0.129071	0.0426927	0.192971	0.00231846	0.0741782	0.245443	-0.299291	1.66685e-06	0.130194	0.0409052	0.105768	0.0972163	0.39837	8.02313e-11	0.208147	0.000999011	-0.0428142	0.503004	-0.0122391	0.848224	0.209083	0.000946559	-0.00495249	0.938273	0.0129434	0.839605	-0.00233508	0.970874	-0.00741682	0.907673	-0.0119843	0.851347
joint6	SpineMid	Z	The variance of amplitudes	0.460342	2.33189e-14	0.0272828	0.669607	0.0665854	0.297263	-0.122955	0.0536163	-0.284225	5.67284e-06	0.0209577	0.743107	-0.0148277	0.816642	0.118867	0.0621419	0.240318	0.000136862	-0.0586753	0.358479	0.0158391	0.804379	0.241219	0.00012892	-0.000419483	0.994767	0.0367488	0.565415	-0.0320864	0.615773	-0.0179183	0.779322	0.0135701	0.831952
joint6	SpineMid	Z	The standard deviation of amplitudes	0.413794	1.23163e-11	0.0205635	0.747775	0.053408	0.403317	-0.130257	0.0408074	-0.257245	4.28627e-05	-0.00117843	0.985299	-0.0315048	0.622191	0.108674	0.0883184	0.249471	7.37928e-05	-0.0388227	0.543665	-0.0133139	0.835079	0.206809	0.00107856	-0.00113192	0.985879	-0.00372334	0.953573	-0.024478	0.701862	-0.010408	0.870716	0.0273478	0.668867
joint6	SpineMid	Z	The skewness of amplitudes	-0.273793	1.272e-05	0.291218	3.24119e-06	-0.0990241	0.120612	-0.0941434	0.140118	0.00915698	0.886143	-0.0277472	0.664323	-0.176938	0.00529142	-0.449909	1.03411e-13	0.0597856	0.34944	-0.0952844	0.135355	-0.190067	0.00270541	-0.108872	0.0877374	0.0214366	0.73745	-0.00694728	0.913494	-0.0260363	0.683872	0.031708	0.619945	0.021138	0.740976
joint6	SpineMid	Z	The kurtosis of amplitudes	-0.20823	0.000994215	0.304499	1.0737e-06	-0.0821964	0.197939	-0.0745647	0.242985	-0.0139762	0.827001	-0.0201153	0.753092	-0.167035	0.00852966	-0.454453	5.43952e-14	0.0667592	0.296001	-0.125043	0.0496523	-0.201043	0.00149265	-0.0886997	0.164622	-0.00759305	0.905489	0.00206387	0.974255	-0.0141052	0.825429	0.0448895	0.482511	0.00206749	0.97421
joint3	SpineShoulder	X	Direct current component	-0.0429141	0.502007	-0.263951	2.64526e-05	-0.270268	1.65889e-05	-0.0255435	0.689542	0.0437746	0.493464	0.0877763	0.169078	0.0353652	0.580152	-0.0902697	0.157247	0.195236	0.0020525	0.0799513	0.210509	-0.0408992	0.52231	0.00878822	0.890699	-0.106891	0.0936987	0.219325	0.000516884	-0.192955	0.00232049	-0.0462493	0.469333	0.0385639	0.546356
joint3	SpineShoulder	X	The mean of phases	0.186751	0.0032181	-0.208937	0.000954595	0.0579692	0.364302	0.297769	1.89243e-06	0.187898	0.00303155	-0.184853	0.0035498	0.193168	0.00229424	-0.108107	0.0900021	-0.028648	0.654119	-0.039005	0.541772	0.0253484	0.691792	-0.159816	0.0118983	0.000968332	0.987919	-0.0307292	0.630792	0.0288929	0.651357	0.0360329	0.573019	-0.00480133	0.940154
joint3	SpineShoulder	X	The variance of phases	0.0222828	0.727489	-0.135459	0.0333429	0.00993016	0.876603	0.197812	0.00178403	0.164366	0.00966087	-0.208033	0.00100556	0.13709	0.0312569	-0.121147	0.0572589	-0.0628903	0.324938	-0.0508246	0.426477	-0.0260103	0.68417	-0.139446	0.0284397	-0.0124242	0.845958	-0.0281713	0.659511	-0.0162066	0.799935	0.00345592	0.956904	0.00340335	0.957559
joint3	SpineShoulder	X	The standard deviation of phases	0.0150864	0.8135	-0.178946	0.00478888	0.0116357	0.855623	0.191057	0.00256731	0.137246	0.0310636	-0.190649	0.00262343	0.129835	0.0414699	-0.131507	0.0388953	-0.0585609	0.359418	-0.0727124	0.254922	-0.0370501	0.56223	-0.171854	0.00678202	-0.00832988	0.896367	-0.035978	0.573603	-0.0178666	0.779943	-0.00385839	0.951891	-0.0201421	0.752773
joint3	SpineShoulder	X	The skewness of phases	-0.0934614	0.143025	-0.0556285	0.384022	0.0147746	0.817287	0.107096	0.0930656	0.104943	0.0998701	-0.184762	0.00356641	0.135993	0.0326481	-0.108309	0.0893989	-0.0518304	0.41737	-0.0736096	0.249091	-0.0366207	0.566772	-0.0802321	0.208907	-0.0316305	0.620802	-0.0109799	0.863679	-0.0452829	0.478678	-0.0132025	0.836439	0.00338167	0.957829
joint3	SpineShoulder	X	The kurtosis of phases	-0.0724463	0.256669	0.0112538	0.860313	0.0279658	0.661841	0.112283	0.0781896	0.126379	0.0472465	-0.191793	0.0024689	0.158661	0.0125339	-0.0891036	0.1627	-0.0509641	0.425208	-0.0575715	0.367607	-0.0292801	0.646998	-0.0417432	0.513754	-0.0337735	0.597325	-0.00377586	0.952919	-0.0430476	0.500675	-0.0092329	0.885206	0.00642573	0.919966
joint3	SpineShoulder	X	The mean of amplitudes	0.464939	1.19029e-14	-0.211176	0.000838404	-0.173318	0.00631842	-0.334053	7.50162e-08	-0.193537	0.00224918	-0.105127	0.0992738	0.0400004	0.5315	0.0282427	0.658702	-0.067099	0.293544	-0.0928853	0.145517	-0.041407	0.517154	-0.112314	0.0781082	-0.151095	0.0174894	0.0152109	0.811991	-0.0613478	0.33697	-0.00355009	0.955731	-0.0282782	0.658301
joint3	SpineShoulder	X	The variance of amplitudes	0.0726338	0.255437	-0.0755149	0.237016	-0.185083	0.00350806	-0.540355	3.98473e-20	-0.267491	2.03951e-05	-0.0414741	0.516474	-0.0612228	0.337957	0.0735189	0.249676	-0.102277	0.108832	-0.105278	0.0987867	-0.116811	0.0668329	-0.0738403	0.247606	-0.110525	0.0829986	-0.00790223	0.901659	-0.0184464	0.772994	-0.0450453	0.480991	-0.0279365	0.662173
joint3	SpineShoulder	X	The standard deviation of amplitudes	0.0680414	0.286802	-0.0797228	0.211821	-0.196431	0.00192364	-0.566845	2.13437e-22	-0.270354	1.64823e-05	-0.0412558	0.518687	-0.115678	0.0695405	0.0690072	0.279999	-0.122028	0.0554596	-0.0590891	0.355093	-0.13865	0.0293661	-0.0587434	0.35792	-0.0997106	0.118047	0.00972038	0.87919	-0.0515237	0.420135	-0.0322237	0.614263	-0.00384774	0.952024
joint3	SpineShoulder	X	The skewness of amplitudes	-0.395193	1.16638e-10	0.0219872	0.730963	-0.0929712	0.145143	-0.333197	8.13525e-08	-0.112999	0.0762965	-0.0273585	0.668744	-0.243458	0.000111018	0.0178889	0.779675	-0.175811	0.00559389	0.0740286	0.246399	-0.202765	0.00135584	0.0170056	0.790295	0.154127	0.0153288	-0.0361658	0.571603	-0.009255	0.884933	0.00233801	0.970837	0.0508267	0.426459
joint3	SpineShoulder	X	The kurtosis of amplitudes	-0.39008	2.11242e-10	0.0181637	0.77638	-0.0804397	0.207727	-0.337766	5.26054e-08	-0.108974	0.0874393	-0.0250853	0.69483	-0.221368	0.00045659	0.0244545	0.702134	-0.185898	0.0033635	0.0696164	0.275766	-0.194458	0.0021406	0.0315035	0.622205	0.151088	0.0174945	-0.0280502	0.660884	-0.00411546	0.94869	0.00766507	0.904597	0.0521489	0.41451
joint3	SpineShoulder	Y	Direct current component	-0.279305	8.33606e-06	-0.0252858	0.692514	-0.00999645	0.875786	-0.206972	0.0010686	-0.0653175	0.306577	-0.0421042	0.510118	0.107723	0.0911574	0.000983807	0.987726	0.0244497	0.70219	0.0386593	0.545364	0.0362858	0.570327	0.0441798	0.489468	-0.00419837	0.947658	-0.0433872	0.4973	0.0182157	0.775756	0.0214062	0.737808	0.0448264	0.483128
joint3	SpineShoulder	Y	The mean of phases	-0.160573	0.0114968	-0.145883	0.0218263	0.0183778	0.773814	0.199995	0.00158201	-0.132052	0.038086	0.0100123	0.87559	-0.00773557	0.903723	-0.0422381	0.508772	-0.155511	0.0144227	0.163432	0.010087	0.095137	0.135963	0.0924908	0.147242	-0.100489	0.11519	0.0262214	0.681746	0.00282721	0.964739	0.00112873	0.985919	-0.0298854	0.640208
joint3	SpineShoulder	Y	The variance of phases	-0.239815	0.000141487	-0.0279269	0.662282	0.0582586	0.361908	0.070721	0.2682	-0.00105365	0.986855	0.024844	0.697621	-0.0046248	0.94235	-0.0282629	0.658474	-0.0938579	0.141329	0.111325	0.0807823	0.0454328	0.477222	0.115009	0.0711791	-0.0493904	0.439661	0.0556869	0.383522	-0.024559	0.700923	0.016173	0.800341	-0.0148261	0.816661
joint3	SpineShoulder	Y	The standard deviation of phases	-0.255532	4.83845e-05	-0.0580515	0.363619	0.0401356	0.530113	0.0727913	0.254405	-0.0124051	0.846192	0.0502192	0.432014	-0.0312812	0.624666	-0.0238788	0.708825	-0.0884811	0.165669	0.110363	0.0834546	0.043816	0.493054	0.120887	0.0577998	-0.061303	0.337323	0.0569573	0.372748	-0.0109873	0.863588	0.0259647	0.684694	-0.0204323	0.74933
joint3	SpineShoulder	Y	The skewness of phases	-0.227149	0.000319469	0.124771	0.0501552	0.0633055	0.321748	-0.0439882	0.491355	0.0727103	0.254935	-0.00503949	0.937191	0.0223367	0.726855	-0.0161073	0.801135	-0.0210451	0.742074	0.0270276	0.672518	0.0205613	0.747801	0.1306	0.040274	-0.0185689	0.771527	0.0597715	0.349554	-0.030806	0.629939	0.0283054	0.657992	-0.0096393	0.88019
joint3	SpineShoulder	Y	The kurtosis of phases	-0.191828	0.00246429	0.14188	0.0257607	0.0713506	0.263952	-0.00903098	0.887699	0.0658918	0.302335	-0.0337451	0.597634	0.0519254	0.416516	-0.0218528	0.732545	-0.0348746	0.585421	0.0397974	0.533587	0.025065	0.695066	0.124035	0.0515355	-0.0292141	0.647739	0.0578704	0.365121	-0.034811	0.586105	0.0152166	0.811921	-0.0119988	0.85117
joint3	SpineShoulder	Y	The mean of amplitudes	0.708294	6.30409e-39	-0.0595226	0.351568	0.0785563	0.218604	-0.0351607	0.582346	-0.185828	0.00337565	0.306222	9.26536e-07	-0.0092249	0.885304	0.0110546	0.862761	-0.139092	0.0288483	0.130923	0.0397796	-0.182611	0.00398112	0.00083924	0.98953	0.070613	0.268933	-0.00210668	0.973721	0.0774835	0.224978	-0.0166386	0.79472	-0.0319108	0.617708
joint3	SpineShoulder	Y	The variance of amplitudes	0.592898	7.71722e-25	0.0678594	0.288096	0.158025	0.0128972	-0.0563015	0.378286	-0.0575458	0.367821	0.432692	1.08382e-12	-0.100067	0.116734	0.0548524	0.390701	-0.0779691	0.222077	0.0657429	0.303431	-0.212475	0.000777083	0.0114381	0.85805	0.0449866	0.481564	-0.00328366	0.95905	0.0351838	0.582099	-0.0310908	0.626777	-0.0219518	0.73138
joint3	SpineShoulder	Y	The standard deviation of amplitudes	0.683647	2.27452e-35	0.0209706	0.742955	0.123269	0.0530055	-0.0853977	0.180972	-0.051177	0.423274	0.398295	8.09387e-11	-0.0468341	0.463726	0.0408396	0.522917	-0.0643779	0.313603	0.0660785	0.300964	-0.188677	0.00291054	-0.0165581	0.79569	0.0705397	0.269432	0.00769836	0.904184	0.0627169	0.326277	0.00708239	0.911818	-0.0161708	0.800367
joint3	SpineShoulder	Y	The skewness of amplitudes	-0.0416508	0.514688	0.0701684	0.271967	0.127617	0.0451047	-0.199527	0.00162347	0.315185	4.23913e-07	0.257127	4.32231e-05	0.00607802	0.924283	-0.0114086	0.858412	0.213102	0.000749022	-0.0553535	0.38638	-0.106604	0.0945868	-0.0102784	0.872312	0.00305816	0.96186	0.00589743	0.926526	0.0378432	0.553885	0.00898138	0.888312	0.0103093	0.871931
joint3	SpineShoulder	Y	The kurtosis of amplitudes	-0.0231309	0.71755	0.0626191	0.327033	0.151315	0.0173237	-0.196109	0.00195768	0.292638	2.88751e-06	0.286063	4.90392e-06	0.00784335	0.902389	-0.0203502	0.750304	0.216533	0.000611278	-0.0418657	0.512518	-0.098793	0.121485	0.00313341	0.960923	-0.00883697	0.890097	-0.00888324	0.889525	0.0445404	0.485927	0.00962958	0.88031	0.0071992	0.91037
joint3	SpineShoulder	Z	Direct current component	0.123669	0.0522336	-0.0614281	0.336336	0.649327	5.78951e-31	-0.0216878	0.734488	-0.123302	0.0529413	-0.344797	2.65258e-08	-0.0465518	0.466428	0.105653	0.0975841	-0.0488863	0.44435	-0.0591784	0.354365	0.014706	0.818121	-0.00243246	0.96966	0.00544851	0.932105	0.0411791	0.519465	-0.033397	0.601421	0.0973182	0.127174	0.0216477	0.73496
joint3	SpineShoulder	Z	The mean of phases	-0.0446897	0.484464	-0.118869	0.0621374	0.290738	3.36954e-06	0.34273	3.24994e-08	-0.139076	0.0288668	0.304554	1.06866e-06	0.262221	2.99969e-05	0.457482	3.52569e-14	0.0541997	0.396372	0.00632303	0.921241	-0.0433295	0.497873	-0.0388428	0.543456	0.0422548	0.508604	0.000783216	0.990229	-0.00506654	0.936855	0.0101897	0.873404	-0.000624204	0.992212
joint3	SpineShoulder	Z	The variance of phases	-0.0939041	0.141133	-0.0671127	0.293445	0.292926	2.82034e-06	0.302939	1.22605e-06	-0.135165	0.0337313	0.265669	2.33271e-05	0.302825	1.23792e-06	0.437738	5.51889e-13	0.0368182	0.56468	0.0290748	0.649308	-0.021179	0.740492	-0.0287333	0.653156	0.0549102	0.390201	-0.0138827	0.82814	-0.0221228	0.729368	0.0104466	0.870241	-0.00283359	0.964659
joint3	SpineShoulder	Z	The standard deviation of phases	-0.114363	0.0727922	-0.0799579	0.210472	0.28301	6.24291e-06	0.313411	4.95865e-07	-0.130258	0.0408054	0.282489	6.50369e-06	0.285206	5.24898e-06	0.440649	3.71984e-13	0.0321489	0.615086	0.0366509	0.566452	-0.0336632	0.598524	-0.0580853	0.36334	0.0615905	0.335058	-0.0159779	0.8027	-0.0190446	0.765842	0.0255003	0.69004	-0.00591207	0.926345
joint3	SpineShoulder	Z	The skewness of phases	-0.149061	0.0190833	0.0488398	0.444783	0.242334	0.000119696	0.18781	0.0030455	-0.0864543	0.175615	0.134187	0.0350521	0.296318	2.13431e-06	0.309308	7.09932e-07	-0.0377993	0.554346	0.0381157	0.551033	-0.00557155	0.930576	-0.00328198	0.959071	0.0404982	0.5264	-0.011645	0.85551	-0.048993	0.443355	0.0329514	0.606284	-0.000355916	0.99556
joint3	SpineShoulder	Z	The kurtosis of phases	-0.108652	0.0883837	0.0876587	0.169653	0.231724	0.000239275	0.164986	0.00938702	-0.0643891	0.313518	0.092271	0.14821	0.298925	1.71858e-06	0.268399	1.90679e-05	-0.0315167	0.622059	0.0244948	0.701668	0.00525965	0.934453	0.0238431	0.709241	0.0277232	0.664595	-0.0011469	0.985692	-0.0521093	0.414865	0.0249946	0.695879	-0.00571814	0.928754
joint3	SpineShoulder	Z	The mean of amplitudes	0.482272	8.59264e-16	-0.122746	0.054028	0.177678	0.00510117	0.0756318	0.236288	-0.299919	1.58141e-06	0.136434	0.032082	0.0996035	0.118444	0.39306	1.49613e-10	0.210136	0.000890641	-0.0496049	0.437675	-0.0103269	0.871715	0.212455	0.000778013	-0.0034356	0.957157	0.0141572	0.824796	-0.000649151	0.991901	-0.00788353	0.901891	-0.0157732	0.805177
joint3	SpineShoulder	Z	The variance of amplitudes	0.455137	4.93399e-14	0.0284014	0.656906	0.0569929	0.372449	-0.12201	0.0554954	-0.285158	5.26904e-06	0.0194019	0.76158	-0.0181334	0.776742	0.118509	0.062938	0.243461	0.000111002	-0.0627382	0.326112	0.0176276	0.782813	0.243414	0.000111348	-0.00132415	0.983481	0.0396033	0.535587	-0.0258731	0.685747	-0.0144588	0.821126	0.00953959	0.88142
joint3	SpineShoulder	Z	The standard deviation of amplitudes	0.408868	2.26415e-11	0.0222577	0.727783	0.0432563	0.4986	-0.131207	0.0393466	-0.259013	3.77904e-05	-0.0012687	0.984173	-0.0359249	0.57417	0.106869	0.0937655	0.249683	7.2726e-05	-0.0420548	0.510614	-0.0110308	0.863054	0.208381	0.000985656	-0.00255902	0.968082	-0.00371598	0.953665	-0.0192004	0.763983	-0.00849482	0.894326	0.0235318	0.712868
joint3	SpineShoulder	Z	The skewness of amplitudes	-0.277037	9.93062e-06	0.291683	3.12089e-06	-0.103484	0.1047	-0.0960665	0.132162	0.0122293	0.848345	-0.019352	0.762174	-0.170419	0.00726554	-0.446151	1.74685e-13	0.0540247	0.397902	-0.0951924	0.135734	-0.20194	0.0014199	-0.109149	0.0869291	0.0196334	0.758823	4.24597e-05	0.99947	-0.0376544	0.555867	0.0395908	0.535716	0.0183908	0.773658
joint3	SpineShoulder	Z	The kurtosis of amplitudes	-0.21143	0.000826063	0.306371	9.14791e-07	-0.0864934	0.175419	-0.0774307	0.225295	-0.0095776	0.880951	-0.0109559	0.863975	-0.160707	0.0114273	-0.449848	1.04298e-13	0.0610143	0.339608	-0.124563	0.0505422	-0.214023	0.000709459	-0.0899955	0.158516	-0.00877866	0.890817	0.00982555	0.877893	-0.0268839	0.67416	0.0520061	0.415791	-2.38019e-05	0.999703
joint13	ThumbLeft	X	Direct current component	-0.253969	5.40044e-05	-0.330607	1.0383e-07	0.00493065	0.938545	-0.239258	0.000146784	0.105846	0.0969686	0.208539	0.000976695	-0.0706015	0.269012	-0.025926	0.685139	0.161677	0.0109333	-0.0647187	0.311042	0.157656	0.0131119	0.00605315	0.924592	0.0681874	0.285766	0.0352368	0.58153	0.03836	0.548482	0.102339	0.108617	-0.108102	0.0900157
joint13	ThumbLeft	X	The mean of phases	0.0614769	0.335952	0.0352248	0.581658	0.00642554	0.919968	0.026179	0.682232	-0.270111	1.67843e-05	0.210046	0.000895284	-0.155256	0.0145865	-0.103291	0.10535	-0.000843316	0.989479	-0.0772134	0.226603	0.0527245	0.409371	-0.0426013	0.505131	0.0380752	0.551457	0.164083	0.00978849	0.0650322	0.308699	0.00249073	0.968933	-0.0719505	0.259947
joint13	ThumbLeft	X	The variance of phases	0.00654309	0.918509	0.0574054	0.368993	0.0255713	0.689222	0.0905279	0.156058	-0.119056	0.0617233	0.1895	0.00278741	-0.142474	0.0251407	-0.128346	0.0438817	0.0404179	0.527221	-0.0736272	0.248977	0.0183025	0.774717	-0.0183025	0.774717	0.0600863	0.347018	0.164515	0.00959456	0.0691317	0.279131	0.0575687	0.36763	-0.0672266	0.292625
joint13	ThumbLeft	X	The standard deviation of phases	-0.0229643	0.719498	0.0340867	0.593929	0.0366221	0.566757	0.0794436	0.21343	-0.142803	0.0248028	0.199008	0.00167058	-0.157818	0.0130167	-0.117516	0.0651922	0.0376144	0.556286	-0.0661569	0.30039	0.0188272	0.768438	-0.0244159	0.702582	0.0569237	0.373031	0.154025	0.0153976	0.0672864	0.292195	0.065197	0.307472	-0.0766639	0.229936
joint13	ThumbLeft	X	The skewness of phases	-0.0863399	0.176189	0.0934719	0.14298	0.0486444	0.44661	0.10003	0.116868	-0.00173144	0.978401	0.0839379	0.188571	-0.0585724	0.359324	-0.0876428	0.16973	0.0474974	0.457414	-0.0864949	0.175412	-0.0154505	0.809086	0.0205942	0.74741	0.0360684	0.57264	0.110581	0.0828426	0.0429098	0.502049	0.0681419	0.286089	-0.0583068	0.36151
joint13	ThumbLeft	X	The kurtosis of phases	-0.0597599	0.349648	0.137573	0.0306604	0.0477503	0.455018	0.0906525	0.155487	0.0228338	0.721026	0.0428105	0.50304	-0.0201638	0.752517	-0.0765732	0.23049	0.0378753	0.553549	-0.08082	0.20558	-0.0168569	0.792086	0.032006	0.61666	0.0286058	0.654596	0.103462	0.104774	0.039143	0.540342	0.0525599	0.410837	-0.0477097	0.455403
joint13	ThumbLeft	X	The mean of amplitudes	0.430764	1.39847e-12	0.240591	0.000134403	-0.181073	0.00430379	0.212155	0.000791801	-0.00287968	0.964085	0.0198428	0.75633	0.0801244	0.20952	-0.0549771	0.389623	-0.0456085	0.475518	0.00536688	0.93312	-0.0604159	0.344374	0.0596683	0.350388	0.0540448	0.397725	0.00486001	0.939424	0.0253967	0.691234	0.0341002	0.593783	-0.0212995	0.739068
joint13	ThumbLeft	X	The variance of amplitudes	0.24813	8.09056e-05	0.27391	1.26081e-05	-0.178531	0.00488926	0.262311	2.9803e-05	0.273174	1.33314e-05	-0.0512939	0.422214	0.186821	0.00320643	-0.00765449	0.904728	-0.129405	0.0421543	0.0274149	0.668103	-0.105618	0.097694	0.02345	0.713823	-0.0653772	0.306135	-0.0850368	0.18283	0.0109991	0.863444	-0.0406612	0.524736	0.00996473	0.876177
joint13	ThumbLeft	X	The standard deviation of amplitudes	0.275842	1.08829e-05	0.202727	0.00135875	-0.148461	0.0195767	0.230528	0.000258191	0.245981	9.36503e-05	-0.0369448	0.563342	0.169913	0.00744315	-0.0452996	0.478516	-0.034794	0.586289	0.0125885	0.843946	-0.0680214	0.286943	0.0677738	0.288705	-0.0130209	0.838658	-0.0769047	0.228472	0.00503884	0.937199	-0.00397605	0.950426	0.00597895	0.925514
joint13	ThumbLeft	X	The skewness of amplitudes	-0.137578	0.0306551	0.0829781	0.193693	0.0763479	0.231868	0.157455	0.0132298	0.418697	6.65146e-12	0.119111	0.0616024	0.0679791	0.287244	-0.0499611	0.434388	0.0932131	0.144095	0.0283949	0.65698	-0.0461163	0.470613	0.0348771	0.585394	7.67464e-05	0.999043	-0.0122113	0.848565	-0.0145644	0.819842	0.0100736	0.874836	-0.0248205	0.697894
joint13	ThumbLeft	X	The kurtosis of amplitudes	-0.133449	0.0360766	0.098059	0.124292	0.0838667	0.188948	0.144123	0.0234869	0.402192	5.08774e-11	0.134958	0.0340081	0.0678458	0.288192	-0.0509289	0.425528	0.0763142	0.232075	0.0216051	0.735462	-0.0439445	0.491786	0.0312068	0.62549	-0.0141492	0.824894	-0.00545607	0.932011	-0.0112656	0.860168	0.00505868	0.936953	-0.0210565	0.741938
joint13	ThumbLeft	Y	Direct current component	0.111535	0.0802084	0.331331	9.70119e-08	-0.0704	0.270384	0.0355524	0.578148	-0.241008	0.000130738	-0.09412	0.140217	-0.0288957	0.651325	-0.261921	3.0657e-05	0.0675537	0.290278	0.0114937	0.857367	0.132292	0.0377349	0.0390824	0.540971	-0.0397937	0.533625	0.0860232	0.177787	0.0250791	0.694902	-0.0262103	0.681873	0.0104987	0.869599
joint13	ThumbLeft	Y	The mean of phases	0.163785	0.00992433	0.303471	1.17185e-06	-0.0896796	0.159989	-0.102311	0.108715	-0.256773	4.43206e-05	0.0217662	0.733565	0.142417	0.0252001	0.0122534	0.84805	-0.113099	0.076036	-0.0656712	0.30396	0.0210736	0.741737	-0.0799768	0.210364	0.0383094	0.549009	0.091816	0.150229	-0.00516286	0.935657	-0.0771837	0.226783	0.0325825	0.610323
joint13	ThumbLeft	Y	The variance of phases	0.205131	0.00118664	0.265492	2.36325e-05	-0.0414249	0.516973	-0.00158617	0.980213	-0.214987	0.000670145	-0.0283892	0.657045	0.107409	0.0921088	-0.0101298	0.874143	-0.0606937	0.342156	-0.0275956	0.666045	-0.00143161	0.982141	-0.100178	0.116327	0.0102939	0.872121	0.111546	0.0801781	-0.0203502	0.750303	-0.0390133	0.541687	0.054314	0.395376
joint13	ThumbLeft	Y	The standard deviation of phases	0.171121	0.00702517	0.242503	0.000118351	-0.0291254	0.648738	-0.0198892	0.755779	-0.229552	0.000274666	-0.0273045	0.669359	0.100624	0.114702	-0.020388	0.749855	-0.0591602	0.354514	-0.0210191	0.742381	0.00119767	0.985059	-0.10453	0.101217	-0.0118643	0.852819	0.0938544	0.141344	-0.0226664	0.722987	-0.0368484	0.56436	0.0750029	0.240219
joint13	ThumbLeft	Y	The skewness of phases	0.138727	0.0292753	0.204238	0.00124809	0.0214453	0.737347	0.055184	0.387839	-0.119427	0.0609125	-0.0588268	0.357237	0.112811	0.07679	-0.00527678	0.93424	-0.0124875	0.845183	0.0284743	0.656082	-0.0103534	0.871389	-0.0814204	0.202221	-0.0380039	0.552203	0.0949707	0.136652	-0.0380203	0.552031	-0.0068215	0.915054	0.0691314	0.279133
joint13	ThumbLeft	Y	The kurtosis of phases	0.144133	0.0234771	0.240161	0.000138291	0.011936	0.85194	0.0616412	0.334659	-0.0829733	0.193719	-0.0639017	0.317203	0.129003	0.0428031	0.00599056	0.925369	-0.0281605	0.659633	0.0221606	0.728924	-0.0123301	0.84711	-0.056956	0.372759	-0.0267999	0.67512	0.0936487	0.142222	-0.0367174	0.565748	-0.00663543	0.917363	0.0453834	0.477701
joint13	ThumbLeft	Y	The mean of amplitudes	0.363254	4.04889e-09	0.243865	0.00010803	-0.0807118	0.206189	0.124079	0.0514516	-0.324033	1.90947e-07	-0.0148974	0.815795	-0.0654891	0.305306	-0.191944	0.00244913	-0.0704276	0.270196	0.0372231	0.560404	0.056797	0.374097	-0.0141113	0.825355	0.0507631	0.427038	0.0217542	0.733706	-0.0471609	0.46061	0.0134445	0.833485	-0.0198349	0.756425
joint13	ThumbLeft	Y	The variance of amplitudes	0.186185	0.00331388	0.22525	0.000359594	-0.0643587	0.313747	0.133417	0.0361224	-0.259976	3.527e-05	-0.057556	0.367736	-0.0998801	0.11742	-0.222201	0.000433937	-0.0167781	0.793036	0.0552091	0.387623	0.0437247	0.493957	0.00823425	0.89755	0.0302637	0.635979	-0.0020584	0.974324	-0.0130677	0.838086	-0.013482	0.833028	0.00452325	0.943614
joint13	ThumbLeft	Y	The standard deviation of amplitudes	0.263768	2.68078e-05	0.128399	0.0437931	-0.0400615	0.530873	0.16048	0.0115453	-0.218904	0.000530216	-0.0345103	0.589347	-0.12584	0.0482056	-0.201959	0.00141841	-0.013521	0.832551	0.0617809	0.333563	0.0341245	0.593519	-0.0125519	0.844395	0.00154082	0.980778	0.00815551	0.898524	-0.0237405	0.710436	0.0160262	0.802116	-0.00468322	0.941623
joint13	ThumbLeft	Y	The skewness of amplitudes	-0.171868	0.00677729	-0.293532	2.68409e-06	0.102069	0.109556	0.226412	0.000334526	0.24142	0.000127212	-0.013029	0.838559	-0.342479	3.33061e-08	0.00197686	0.97534	0.0105408	0.869081	0.0775353	0.224667	-0.0619003	0.332628	-0.0838614	0.188976	0.028911	0.651152	0.15839	0.0126873	0.0267001	0.67626	0.0229489	0.719678	-0.0387333	0.544593
joint13	ThumbLeft	Y	The kurtosis of amplitudes	-0.169144	0.00772088	-0.27287	1.36416e-05	0.116694	0.0671089	0.221178	0.000461905	0.23307	0.000219515	-0.00879592	0.890604	-0.362616	4.3296e-09	0.0108912	0.86477	-0.0129449	0.839588	0.056409	0.377375	-0.0475437	0.456974	-0.0724144	0.256879	0.0280324	0.661085	0.161475	0.0110344	0.0467671	0.464367	0.0170762	0.789445	-0.0568768	0.373425
joint13	ThumbLeft	Z	Direct current component	0.11821	0.0636112	-0.0172639	0.787186	-0.0414151	0.517072	0.0359541	0.573858	0.25407	5.36222e-05	-0.117769	0.0646122	0.163121	0.0102326	0.0795527	0.2128	-0.0161187	0.800997	0.0188887	0.767703	-0.122034	0.0554477	0.0892208	0.162146	0.111239	0.0810178	-0.0611775	0.338315	-0.1055	0.0980716	0.00603495	0.924818	-0.0276757	0.665135
joint13	ThumbLeft	Z	The mean of phases	0.379542	6.95892e-10	0.0635062	0.320214	-0.0859589	0.178112	-0.0105136	0.869416	0.182756	0.00395183	-0.0561338	0.379711	-0.0698468	0.274176	-0.0735947	0.249186	-0.0666545	0.296761	-0.0278701	0.662927	-0.097666	0.125814	0.00620847	0.922663	-0.0610618	0.339231	-0.0383273	0.548822	0.0221199	0.729403	0.0178791	0.779793	0.00893275	0.888913
joint13	ThumbLeft	Z	The variance of phases	0.279837	7.99888e-06	-0.0231363	0.717487	-0.130561	0.0403355	0.0157345	0.805645	0.235644	0.000185921	-0.0289589	0.650613	-0.117672	0.0648333	-0.0880853	0.167577	-0.0246727	0.699605	-0.00653074	0.918662	-0.05798	0.364212	-0.0270346	0.672438	-0.0648752	0.309871	-0.0198462	0.75629	0.00880493	0.890493	0.030769	0.63035	0.0066875	0.916717
joint13	ThumbLeft	Z	The standard deviation of phases	0.269661	1.73586e-05	-0.0631188	0.32318	-0.136097	0.0325138	0.0163423	0.798296	0.246439	9.07847e-05	-0.0324467	0.611813	-0.141108	0.026586	-0.0887915	0.164183	-0.0262164	0.681804	-0.00199095	0.975165	-0.0710845	0.265742	-0.0265945	0.67747	-0.0880601	0.167699	-0.0370792	0.561922	-0.0112314	0.860588	0.0417689	0.513495	0.0146373	0.818955
joint13	ThumbLeft	Z	The skewness of phases	0.103981	0.103032	-0.0604357	0.344216	-0.115912	0.0689742	0.00956932	0.881053	0.218363	0.000547767	-0.0262386	0.681549	-0.101258	0.11242	-0.0832932	0.192001	0.0125392	0.84455	-0.00981752	0.877992	-0.0265895	0.677527	-0.0298406	0.64071	-0.0698189	0.274368	-0.0084377	0.895033	-0.0147866	0.817141	0.0320575	0.616092	0.0169175	0.791356
joint13	ThumbLeft	Z	The kurtosis of phases	0.0843422	0.186443	0.00825407	0.897305	-0.0924838	0.147273	0.00923595	0.885168	0.188245	0.00297714	-0.0419279	0.511892	-0.0626702	0.326638	-0.0762006	0.232773	0.00939963	0.883147	-0.0142878	0.823206	-0.0166764	0.794262	-0.0187233	0.76968	-0.0579225	0.364689	0.00744787	0.907288	-0.00430494	0.946331	0.0154114	0.809559	0.00974407	0.878898
joint13	ThumbLeft	Z	The mean of amplitudes	0.430022	1.54209e-12	-0.446722	1.61363e-13	-0.103686	0.10402	0.0633892	0.321108	-0.00273093	0.965939	0.120839	0.0578997	-0.0126389	0.843329	-0.0570776	0.371737	0.041241	0.518836	-0.0100149	0.875559	0.0297879	0.6413	-0.0789729	0.216164	-0.00933926	0.883892	-0.00356243	0.955578	-0.0221375	0.729195	0.0330049	0.605699	0.00538627	0.932879
joint13	ThumbLeft	Z	The variance of amplitudes	-0.0656822	0.303879	-0.378495	7.81614e-10	-0.0585319	0.359656	0.0958578	0.133008	0.0219386	0.731535	0.206024	0.00112792	0.0481837	0.450931	-0.0322989	0.613437	0.0940835	0.140371	-0.012398	0.846278	0.0841804	0.187293	-0.163185	0.0102024	0.00988986	0.8771	0.0497827	0.436032	-0.0342712	0.591931	-0.0317816	0.619134	0.00622224	0.922492
joint13	ThumbLeft	Z	The standard deviation of amplitudes	-0.0470164	0.461986	-0.439682	4.24252e-13	-0.0605241	0.343509	0.104863	0.100131	0.0178862	0.779708	0.225943	0.000344433	0.00291307	0.963669	-0.0132806	0.835486	0.115419	0.0701704	-0.00744186	0.907362	0.081065	0.204204	-0.135211	0.0336712	0.000152071	0.998103	0.0355922	0.577723	-0.0509501	0.425335	0.00220582	0.972485	-0.00197371	0.97538
joint13	ThumbLeft	Z	The skewness of amplitudes	-0.39892	7.51664e-11	-0.30293	1.22696e-06	0.029497	0.644561	0.13048	0.0404595	0.171671	0.00684178	0.282464	6.51619e-06	-0.175324	0.00572933	0.07975	0.211664	0.128081	0.0443219	0.0115293	0.856929	0.0779262	0.222332	-0.0866782	0.174495	-0.00585164	0.927095	0.0169068	0.791486	-0.0693388	0.27769	0.0147218	0.817928	-0.0296091	0.643303
joint13	ThumbLeft	Z	The kurtosis of amplitudes	-0.41899	6.4085e-12	-0.297146	1.99295e-06	0.0331436	0.604184	0.122551	0.0544141	0.164147	0.00975921	0.284538	5.53419e-06	-0.178922	0.00479467	0.0725889	0.255732	0.125898	0.0481003	0.0113768	0.858802	0.0844678	0.185786	-0.0824827	0.196376	-0.00298701	0.962747	0.0136949	0.83043	-0.0701989	0.271758	0.011965	0.851584	-0.0263678	0.680067
joint17	ThumbRight	X	Direct current component	-0.338375	4.96109e-08	-0.314273	4.59566e-07	0.203223	0.00132147	-0.136309	0.0322414	-0.183968	0.0037147	0.117899	0.0643162	0.0348381	0.585814	-0.0547694	0.39142	-0.0910944	0.153474	-0.103864	0.103425	-0.11251	0.077585	0.0772551	0.226352	-0.0873561	0.171136	-0.0511221	0.423772	-0.00944519	0.882585	0.0212761	0.739344	-0.0305685	0.632582
joint17	ThumbRight	X	The mean of phases	0.0505282	0.429183	-0.0417968	0.513214	-0.0271441	0.671188	0.156949	0.013532	-0.217526	0.000576018	-0.0558594	0.382048	0.0227565	0.721932	0.0722338	0.258071	0.00813363	0.898795	0.0555004	0.385119	-0.0278911	0.662689	-0.0124107	0.846123	0.0735248	0.249638	0.0133453	0.834695	-0.0324323	0.611971	-0.0762767	0.232305	0.0800287	0.210067
joint17	ThumbRight	X	The variance of phases	-0.0330261	0.605468	-0.0677858	0.28862	-0.000149781	0.998131	0.13131	0.0391913	-0.125916	0.0480687	-0.099378	0.119284	0.0248029	0.698097	0.0252898	0.692469	0.0494739	0.438888	0.0582857	0.361684	-0.0187776	0.769031	-0.0133569	0.834554	0.101106	0.112963	0.0386363	0.545603	-0.0361124	0.572171	-0.0796028	0.212511	0.0576051	0.367327
joint17	ThumbRight	X	The standard deviation of phases	-0.0245015	0.70159	-0.0634215	0.320861	-0.0237617	0.710189	0.124669	0.050344	-0.115666	0.0695683	-0.090756	0.155013	0.011599	0.856075	0.0239765	0.707688	0.0376378	0.55604	0.0519109	0.416646	-0.0182168	0.775743	-0.0343146	0.591462	0.0999614	0.117121	0.0338016	0.59702	-0.0400473	0.531018	-0.0840837	0.187802	0.0623513	0.32911
joint17	ThumbRight	X	The skewness of phases	-0.115497	0.0699806	-0.0477422	0.455095	0.0553063	0.386786	0.0414481	0.516738	-0.031826	0.618644	-0.126183	0.0475935	0.072418	0.256856	-0.0430143	0.501007	0.0804207	0.207835	0.0120965	0.849972	0.0324741	0.611512	-0.0176804	0.782178	0.0758547	0.234906	0.0363872	0.56925	-0.0282685	0.65841	-0.0605427	0.343361	0.0194908	0.76052
joint17	ThumbRight	X	The kurtosis of phases	-0.104375	0.101726	-0.0307733	0.630302	0.0794603	0.213334	0.0395735	0.535893	-0.0416183	0.515016	-0.137146	0.0311868	0.0993208	0.119498	-0.0400528	0.530962	0.0832745	0.192101	0.008375	0.895808	0.0379839	0.552411	0.0170856	0.789331	0.0620622	0.331363	0.0423702	0.507446	-0.0303499	0.635018	-0.0580128	0.363941	0.00954023	0.881412
joint17	ThumbRight	X	The mean of amplitudes	0.587588	2.52943e-24	0.227292	0.000316629	-0.126319	0.0473521	0.0264834	0.678741	0.00556984	0.930597	-0.129985	0.0412323	-0.0506624	0.427957	-0.020312	0.750757	0.0870366	0.172713	0.11351	0.074969	0.00880144	0.890536	0.00611356	0.923842	0.053674	0.400975	0.0105558	0.868896	-0.0086609	0.892273	0.00100182	0.987502	0.00846864	0.89465
joint17	ThumbRight	X	The variance of amplitudes	0.421479	4.66804e-12	0.296526	2.09797e-06	-0.141951	0.0256863	-0.0194666	0.760809	0.266788	2.14824e-05	-0.150837	0.0176847	-0.0488178	0.444989	-0.0743712	0.244213	0.155956	0.014142	0.205037	0.00119292	0.00846718	0.894668	-0.0125315	0.844644	0.0724443	0.256682	-0.0465119	0.466811	-0.0265547	0.677925	-0.00936503	0.883574	0.0171702	0.788313
joint17	ThumbRight	X	The standard deviation of amplitudes	0.435092	7.87318e-13	0.271676	1.49257e-05	-0.140558	0.0271875	-0.0350734	0.583284	0.185621	0.00341199	-0.110169	0.0840012	-0.0537943	0.399919	-0.0748458	0.241209	0.0980664	0.124263	0.13603	0.0326002	0.0249462	0.696439	-0.0376994	0.555394	0.0431083	0.500072	-0.00886613	0.889736	-0.00981882	0.877976	0.020817	0.744773	0.00270418	0.966272
joint17	ThumbRight	X	The skewness of amplitudes	-0.31297	5.15503e-07	0.0857778	0.179031	0.00257077	0.967935	-0.088597	0.165113	0.180898	0.00434199	-0.0290477	0.649612	-0.0356973	0.576599	-0.0452381	0.479114	0.0255991	0.688902	0.0843883	0.186202	-0.0831644	0.192691	-0.0548927	0.390352	0.0146104	0.819283	0.075997	0.234027	-0.00563043	0.929844	-0.0335623	0.599622	0.0608546	0.340875
joint17	ThumbRight	X	The kurtosis of amplitudes	-0.307357	8.40422e-07	0.0975795	0.126152	-0.00116137	0.985511	-0.0926562	0.146517	0.156529	0.0137871	-0.0527358	0.40927	-0.0301299	0.637474	-0.0356748	0.57684	0.0257898	0.686706	0.10507	0.0994572	-0.0838107	0.189244	-0.0624221	0.328561	0.0176692	0.782313	0.0750711	0.239791	-0.000164559	0.997947	-0.0493457	0.440076	0.064389	0.313519
joint17	ThumbRight	Y	Direct current component	0.132851	0.0369263	0.348666	1.80653e-08	-0.139194	0.0287301	-0.0874062	0.17089	0.234743	0.000197096	-0.0743743	0.244194	-0.0204118	0.749573	0.0151189	0.813106	0.275219	1.14129e-05	0.0485632	0.447369	0.12593	0.0480427	-0.149544	0.0186937	0.0620932	0.331121	-0.0598307	0.349076	0.0197946	0.756904	-0.0185927	0.771243	0.01913	0.764823
joint17	ThumbRight	Y	The mean of phases	0.0478461	0.454113	0.156017	0.0141034	-0.110371	0.0834335	0.116952	0.0665034	-0.0621627	0.330579	0.0767948	0.229139	-0.115287	0.0704948	0.16467	0.00952559	-0.0028492	0.964465	-0.114654	0.0720615	-0.0547371	0.391699	-0.142188	0.0254374	-0.0525269	0.411131	-0.053997	0.398144	0.0501806	0.432369	-0.0349656	0.584442	0.0638419	0.317657
joint17	ThumbRight	Y	The variance of phases	0.0821169	0.198375	0.189353	0.00280899	-0.103374	0.10507	0.176669	0.00536243	0.00610391	0.923962	-0.0095707	0.881036	-0.180122	0.00451505	0.184979	0.00352682	-0.00536698	0.933119	-0.112897	0.0765638	-0.0342247	0.592434	-0.101126	0.112894	-0.0692613	0.278228	0.00747392	0.906965	0.094468	0.13875	-0.0364415	0.568673	-0.00393085	0.950989
joint17	ThumbRight	Y	The standard deviation of phases	0.045732	0.474323	0.155787	0.0142483	-0.0947685	0.137493	0.159658	0.0119834	-0.00919223	0.885708	-0.00147369	0.981616	-0.197121	0.00185269	0.18228	0.00404868	0.0135626	0.832043	-0.11851	0.0629353	-0.0307812	0.630215	-0.103116	0.105945	-0.0698903	0.273877	0.00304188	0.962063	0.0903788	0.156744	-0.0354509	0.579234	0.00545732	0.931996
joint17	ThumbRight	Y	The skewness of phases	0.0318016	0.618913	0.173794	0.00617399	-0.0668399	0.295416	0.145405	0.0222665	0.0552914	0.386914	-0.072271	0.257825	-0.132211	0.0378526	0.14044	0.0273182	-0.0133927	0.834117	-0.0638414	0.317661	-0.00604317	0.924716	-0.0383217	0.54888	-0.0705305	0.269495	0.0727757	0.254508	0.0884813	0.165668	-0.0270339	0.672446	-0.0245181	0.701397
joint17	ThumbRight	Y	The kurtosis of phases	0.0524972	0.411395	0.214588	0.000686183	-0.0706207	0.268881	0.148503	0.019542	0.0740727	0.246117	-0.0712939	0.264333	-0.0866091	0.17484	0.125391	0.0490157	-0.0202996	0.750903	-0.0504369	0.430019	-0.0159552	0.802974	-0.0321216	0.615387	-0.062363	0.32902	0.0674444	0.291061	0.0782501	0.22041	-0.0266625	0.676691	-0.0192638	0.763226
joint17	ThumbRight	Y	The mean of amplitudes	0.452481	7.19684e-14	0.386938	3.02762e-10	-0.226067	0.0003418	-0.0543888	0.394724	0.146173	0.0215625	-0.0411854	0.519401	-0.163903	0.00987	0.231279	0.000246162	0.108517	0.0887836	-0.0867222	0.174275	0.15056	0.0178971	-0.0268271	0.674808	0.0517792	0.417832	-0.01403	0.826345	-0.0144192	0.821607	-0.00114336	0.985736	-0.0163085	0.798704
joint17	ThumbRight	Y	The variance of amplitudes	0.307837	8.06293e-07	0.435516	7.43867e-13	-0.246477	9.05554e-05	-0.04426	0.488679	0.28436	5.61261e-06	-0.130467	0.04048	-0.11897	0.0619131	0.162243	0.0106538	0.205657	0.00115175	0.0379339	0.552935	0.119574	0.0605918	0.00182557	0.977227	0.014434	0.821427	-0.0138238	0.828858	-0.0279303	0.662243	-0.0345001	0.589458	0.0104189	0.870582
joint17	ThumbRight	Y	The standard deviation of amplitudes	0.360872	5.19588e-09	0.350347	1.5264e-08	-0.204822	0.00120759	-0.0518513	0.417182	0.202949	0.00134194	-0.104219	0.102243	-0.131728	0.0385663	0.131941	0.0382504	0.169476	0.00759971	-0.00225275	0.9719	0.13102	0.0396316	0.017969	0.778714	0.0288924	0.651362	0.00155609	0.980588	-0.00900245	0.888052	-0.0271268	0.671386	-0.0221035	0.729596
joint17	ThumbRight	Y	The skewness of amplitudes	-0.211911	0.000803171	-0.097985	0.124577	0.102905	0.106665	0.199816	0.00159772	0.0711336	0.265411	-0.107378	0.0922026	-0.212814	0.000761814	0.0801437	0.20941	0.0749234	0.240719	0.019961	0.754926	-0.0284691	0.656141	0.0807741	0.205838	-0.0530577	0.406413	0.0736089	0.249095	0.139812	0.0280218	-0.0310913	0.62677	-0.117336	0.0656073
joint17	ThumbRight	Y	The kurtosis of amplitudes	-0.223779	0.000393845	-0.100411	0.115474	0.114766	0.0717827	0.195109	0.00206668	0.0799068	0.210765	-0.108122	0.0899582	-0.217735	0.000568825	0.0943919	0.139069	0.0884491	0.165822	0.0404567	0.526825	-0.0295792	0.643639	0.0669894	0.294335	-0.0538333	0.399578	0.0606049	0.342864	0.142597	0.0250139	-0.0378018	0.55432	-0.104802	0.100328
joint17	ThumbRight	Z	Direct current component	-0.153825	0.0155333	0.233322	0.000215994	-0.0230299	0.718731	0.105706	0.0974146	-0.185387	0.00345353	-0.118274	0.0634654	-0.0660773	0.300973	0.0144093	0.821728	0.0677038	0.289205	0.0478616	0.453967	0.0389974	0.541852	-0.232418	0.000228889	0.109436	0.0860962	0.0867218	0.174277	-0.0330291	0.605435	0.125367	0.0490599	-0.00107411	0.9866
joint17	ThumbRight	Z	The mean of phases	0.338601	4.85436e-08	-0.167745	0.0082495	-0.150186	0.0181869	-0.158131	0.0128357	0.132106	0.0380076	-0.00447926	0.944162	0.0143518	0.822428	0.161247	0.0111498	0.0928347	0.145737	0.121259	0.0570281	0.0197769	0.757115	-0.120189	0.0592707	-0.0209512	0.743184	0.0218068	0.733086	-0.0070798	0.91185	-0.0182591	0.775237	0.0637027	0.318716
joint17	ThumbRight	Z	The variance of phases	0.236427	0.000176694	-0.227693	0.000308762	-0.18192	0.00412326	-0.128282	0.0439866	0.115734	0.069404	0.0155299	0.808123	-0.00678846	0.915464	0.170279	0.00731435	0.0828179	0.194558	0.0956342	0.13392	0.00650384	0.918996	-0.144305	0.0233098	0.0174078	0.785455	0.0063653	0.920716	0.0117817	0.853833	-0.0256638	0.688156	0.0873617	0.171109
joint17	ThumbRight	Z	The standard deviation of phases	0.230879	0.000252499	-0.248156	8.07626e-05	-0.191744	0.00247541	-0.135836	0.032851	0.107926	0.0905451	0.0314412	0.622894	-0.0213994	0.737889	0.196961	0.00186888	0.0820403	0.198795	0.103539	0.104513	-0.00813708	0.898752	-0.150235	0.0181481	0.00737927	0.908138	0.00563744	0.929757	0.0117979	0.853634	-0.00988968	0.877102	0.0937613	0.141741
joint17	ThumbRight	Z	The skewness of phases	0.0773653	0.225688	-0.183731	0.00375997	-0.170194	0.00734392	-0.0913044	0.152524	0.0890349	0.163026	0.0224485	0.725543	-0.0203929	0.749797	0.140793	0.0269287	0.0524185	0.412098	0.0455437	0.476146	-0.0245048	0.701552	-0.124056	0.0514945	0.049058	0.442749	0.0186828	0.770164	0.0240774	0.706515	-0.00326392	0.959296	0.101586	0.111257
joint17	ThumbRight	Z	The kurtosis of phases	0.0690996	0.279354	-0.107859	0.0907449	-0.15114	0.0174553	-0.0774057	0.225446	0.0951087	0.13608	0.00354882	0.955747	-0.00248404	0.969016	0.110561	0.0828984	0.0417471	0.513715	0.0324036	0.612286	-0.0125513	0.844402	-0.101738	0.110719	0.0484611	0.448327	0.0308507	0.629442	0.0307939	0.630074	-0.0137564	0.82968	0.0932055	0.144128
joint17	ThumbRight	Z	The mean of amplitudes	0.423607	3.55276e-12	-0.392609	1.57671e-10	-0.261463	3.1688e-05	-0.0750342	0.240023	-0.0863499	0.176139	0.0940145	0.140664	0.0811328	0.203825	0.0200606	0.753742	-0.123519	0.0525208	-0.0344832	0.58964	0.0201247	0.75298	0.0544583	0.39412	-0.0699382	0.273547	0.0155084	0.808383	-0.010055	0.875065	0.0470568	0.461601	0.0127327	0.842182
joint17	ThumbRight	Z	The variance of amplitudes	-0.107486	0.0918746	-0.237009	0.000170111	-0.166269	0.0088416	0.064406	0.313391	-0.0687318	0.281928	0.108745	0.0881085	0.0955921	0.134092	-0.131433	0.0390072	-0.20041	0.00154609	-0.136783	0.0316413	0.0717211	0.261474	0.0449791	0.481637	0.0040176	0.949909	-0.026413	0.679549	0.0103182	0.871821	-0.0609151	0.340395	0.0198022	0.756814
joint17	ThumbRight	Z	The standard deviation of amplitudes	-0.110769	0.0823172	-0.290599	3.40776e-06	-0.155227	0.0146051	0.0974168	0.126788	-0.108443	0.0890027	0.136434	0.0320817	0.0756844	0.235962	-0.0859433	0.178191	-0.184462	0.00362181	-0.136448	0.0320642	0.0185387	0.771889	0.0635669	0.31975	-0.00490601	0.938852	-0.031506	0.622178	0.00171734	0.978577	-0.0195361	0.759982	-0.00416112	0.948122
joint17	ThumbRight	Z	The skewness of amplitudes	-0.523584	8.6671e-19	-0.2651	2.43221e-05	0.0472571	0.459695	0.198786	0.00169118	-0.072352	0.257291	0.102245	0.108944	0.0133897	0.834154	0.0129142	0.839963	-0.0951704	0.135825	-0.0827667	0.194835	-0.10064	0.114641	0.0184822	0.772565	0.00530806	0.933851	-0.0557486	0.382995	-0.0129001	0.840135	-0.0252848	0.692527	-0.0293503	0.646208
joint17	ThumbRight	Z	The kurtosis of amplitudes	-0.524665	7.14213e-19	-0.268994	1.82423e-05	0.0593695	0.352811	0.177445	0.00516041	-0.0767645	0.229323	0.10722	0.0926858	0.0127697	0.84173	0.0113501	0.85913	-0.0943304	0.139328	-0.0743375	0.244428	-0.0951997	0.135704	0.0166327	0.79479	0.00574589	0.928409	-0.0454564	0.476993	-0.015894	0.803714	-0.0355887	0.57776	-0.033219	0.603361
joint10	WristLeft	X	Direct current component	-0.309964	6.70555e-07	-0.345151	2.5616e-08	0.0423024	0.508126	-0.369261	2.13907e-09	-0.00874992	0.891172	0.140829	0.0268892	-0.0596222	0.350761	-0.033251	0.603013	0.117828	0.064478	-0.0469313	0.462798	0.147412	0.0204667	-0.00499448	0.937751	0.0197065	0.757953	0.0330028	0.605722	0.0381381	0.550799	0.0330068	0.605678	-0.0537287	0.400495
joint10	WristLeft	X	The mean of phases	0.181049	0.00430911	0.0565292	0.376358	-0.125437	0.0489328	0.151727	0.0170184	-0.378412	7.88818e-10	0.30817	7.83481e-07	-0.237296	0.000166957	-0.217061	0.000592293	0.0724261	0.256802	0.0235918	0.712169	-0.0253415	0.691871	-0.0458773	0.472919	-0.0216377	0.735078	-0.0177212	0.781688	0.00849306	0.894348	-0.0512833	0.42231	0.00497296	0.938019
joint10	WristLeft	X	The variance of phases	0.124015	0.0515729	0.0802278	0.208931	-0.143564	0.0240371	0.219373	0.000515397	-0.232771	0.000223777	0.299529	1.6339e-06	-0.209045	0.000948642	-0.23466	0.000198157	0.0687504	0.281797	0.0327276	0.608733	-0.075256	0.238632	0.00283644	0.964624	-0.0225945	0.723831	-0.0157884	0.804992	0.0171379	0.788702	-0.0122894	0.847609	0.0233983	0.714426
joint10	WristLeft	X	The standard deviation of phases	0.097612	0.126025	0.0554005	0.385977	-0.137848	0.0303259	0.234498	0.000200237	-0.249242	7.4968e-05	0.315948	3.9613e-07	-0.212565	0.000773009	-0.242717	0.000116668	0.0774642	0.225094	0.0221909	0.728568	-0.0737692	0.248063	-0.0118839	0.852579	-0.031495	0.6223	-0.0415262	0.515947	0.0206014	0.747326	-0.0200839	0.753466	0.0394426	0.537245
joint10	WristLeft	X	The skewness of phases	-0.0255184	0.689831	0.110856	0.0820753	-0.087465	0.170601	0.202825	0.00135135	-0.0570895	0.371638	0.189531	0.0027828	-0.0859736	0.178038	-0.168191	0.00807748	0.0339031	0.595919	0.00613803	0.923538	-0.0804835	0.207479	0.0471873	0.460358	-0.0554674	0.385402	-0.0328687	0.607189	0.0156866	0.806225	0.0130562	0.838227	0.0423565	0.507584
joint10	WristLeft	X	The kurtosis of phases	-0.00828133	0.896967	0.159492	0.0120736	-0.0697331	0.27496	0.171269	0.00697542	-0.0300663	0.638185	0.134551	0.0345558	-0.0471855	0.460376	-0.142889	0.0247158	0.016685	0.79416	0.013492	0.832904	-0.0734374	0.250202	0.0615388	0.335465	-0.0451055	0.480404	-0.00556479	0.93066	0.0143108	0.822927	0.014966	0.814962	0.0218523	0.732551
joint10	WristLeft	X	The mean of amplitudes	0.570202	1.06355e-22	0.229461	0.000276241	-0.240429	0.00013586	0.251223	6.53913e-05	-0.0399086	0.532443	0.0193087	0.762691	0.0842122	0.187126	-0.0357462	0.576076	-0.0301351	0.637416	0.00179845	0.977565	-0.0820403	0.198795	0.0410303	0.520977	0.0179816	0.778563	0.0457263	0.474378	0.00659702	0.91784	-0.000753916	0.990594	-0.0401517	0.529947
joint10	WristLeft	X	The variance of amplitudes	0.271797	1.47905e-05	0.294662	2.44648e-06	-0.188289	0.00297017	0.270518	1.62807e-05	0.286407	4.77116e-06	-0.0519522	0.416275	0.190505	0.00264353	0.0492821	0.440667	-0.148805	0.019292	0.00777645	0.903217	-0.122085	0.0553448	0.0234025	0.714378	-0.0891408	0.162524	-0.0447192	0.484176	0.0175799	0.783385	-0.0413858	0.517368	0.00206009	0.974303
joint10	WristLeft	X	The standard deviation of amplitudes	0.330852	1.01475e-07	0.200737	0.00151831	-0.178229	0.00496337	0.249033	7.60486e-05	0.256542	4.50528e-05	-0.0577698	0.365957	0.197238	0.00184092	0.00151808	0.981062	-0.0652875	0.3068	-0.00520987	0.935072	-0.087751	0.169202	0.0585197	0.359757	-0.0486712	0.446359	0.002553	0.968157	0.00680899	0.915209	-0.00845419	0.894829	-0.0167701	0.793133
joint10	WristLeft	X	The skewness of amplitudes	-0.245962	9.37732e-05	0.0648264	0.310236	0.172431	0.00659569	0.141789	0.0258572	0.41069	1.80967e-11	0.0416805	0.514388	0.104871	0.100103	-0.00720237	0.910331	-0.0106914	0.867228	0.0130307	0.838538	-0.0789426	0.216341	0.0580151	0.363921	0.0713247	0.264126	-0.0232756	0.715859	-0.00165876	0.979307	-0.0180707	0.777495	0.0082419	0.897455
joint10	WristLeft	X	The kurtosis of amplitudes	-0.248383	7.95146e-05	0.0834995	0.190898	0.178057	0.00500599	0.134691	0.0343661	0.397685	8.69934e-11	0.0598085	0.349256	0.103353	0.105143	-0.00711383	0.911429	-0.0183423	0.77424	0.0100713	0.874863	-0.0757591	0.235498	0.0568239	0.373871	0.0660372	0.301267	-0.0235605	0.712534	-0.00279944	0.965085	-0.0295868	0.643554	0.0106787	0.867384
joint10	WristLeft	Y	Direct current component	0.11762	0.0649543	0.257341	4.2572e-05	-0.0890116	0.163136	0.0298381	0.640738	-0.266703	2.1618e-05	-0.140944	0.0267639	-0.0770371	0.227669	-0.221774	0.000445421	0.0508503	0.426244	0.0266618	0.676699	0.116988	0.0664173	0.0668225	0.295542	0.00311641	0.961135	0.0898532	0.159179	0.0392897	0.538825	0.0420879	0.510281	0.0634597	0.320569
joint10	WristLeft	Y	The mean of phases	0.341417	3.69429e-08	0.402959	4.64037e-11	-0.0464647	0.467264	-0.0626571	0.326739	-0.27517	1.14558e-05	0.14062	0.0271194	0.138911	0.0290593	-0.0288134	0.652253	-0.049736	0.436464	-0.0206799	0.746395	0.0540974	0.397265	-0.135118	0.033795	-0.00412642	0.948554	-0.109285	0.0865341	0.0212722	0.73939	-0.0650043	0.308908	-0.0744211	0.243896
joint10	WristLeft	Y	The variance of phases	0.313074	5.10788e-07	0.366231	2.95593e-09	-0.010866	0.865079	-0.0164701	0.796753	-0.196722	0.0018934	0.143721	0.0238815	0.06491	0.309612	-0.0367085	0.565842	-0.0305637	0.632635	0.0157718	0.805194	0.0658964	0.302301	-0.131481	0.0389342	-0.0343115	0.591495	-0.115829	0.0691733	0.0269394	0.673526	-0.0348846	0.585314	-0.0657516	0.303367
joint10	WristLeft	Y	The standard deviation of phases	0.285951	4.94756e-06	0.359213	6.17372e-09	-0.00507975	0.936691	-0.00753664	0.906188	-0.206109	0.0011225	0.156615	0.0137343	0.0661614	0.300357	-0.0568242	0.373868	-0.0187417	0.76946	0.0279025	0.662559	0.0743964	0.244054	-0.141716	0.0259344	-0.0620454	0.331494	-0.145213	0.0224459	0.0242265	0.704782	-0.0418862	0.512312	-0.0485472	0.44752
joint10	WristLeft	Y	The skewness of phases	0.18089	0.00434375	0.291209	3.24354e-06	0.0423728	0.50742	0.0262132	0.68184	-0.087209	0.171861	0.136154	0.0324407	0.0692969	0.27798	-0.0292136	0.647745	-0.0160399	0.80195	0.0617247	0.334004	0.0534723	0.402751	-0.0963509	0.131016	-0.0894426	0.1611	-0.114514	0.0724125	0.0196954	0.758084	-0.00687636	0.914374	-0.041968	0.511488
joint10	WristLeft	Y	The kurtosis of phases	0.175207	0.00576223	0.307617	8.21776e-07	0.0353196	0.580642	0.0264165	0.679509	-0.0552221	0.387511	0.105043	0.0995455	0.0902444	0.157364	-0.0100352	0.875309	-0.0338713	0.596263	0.0492769	0.440714	0.0397499	0.534076	-0.0735002	0.249796	-0.0799186	0.210697	-0.093247	0.143949	0.0175777	0.783412	-0.00591615	0.926294	-0.0504711	0.429705
joint10	WristLeft	Y	The mean of amplitudes	0.386383	3.22477e-10	0.218478	0.000543982	-0.0687267	0.281964	0.115344	0.0703532	-0.326868	1.47088e-07	-0.00580419	0.927685	-0.0959388	0.13268	-0.171454	0.00691363	-0.0449475	0.481945	0.0159691	0.802807	0.104369	0.101749	-0.00237614	0.970362	0.0495266	0.4384	0.0137322	0.829975	-0.0313247	0.624184	0.0215669	0.735913	-0.0169907	0.790474
joint10	WristLeft	Y	The variance of amplitudes	0.181808	0.00414684	0.159222	0.0122218	-0.0496547	0.437214	0.134894	0.0340938	-0.265305	2.39578e-05	-0.0647275	0.310976	-0.124796	0.0501086	-0.22862	0.000291302	-0.0122334	0.848295	0.0441656	0.489608	0.0959824	0.132503	0.0122844	0.847669	0.0327211	0.608804	-0.00654412	0.918496	-0.0113883	0.858661	-0.00606262	0.924474	0.0221655	0.728867
joint10	WristLeft	Y	The standard deviation of amplitudes	0.226259	0.000337732	0.0184492	0.77296	-0.0220207	0.730569	0.146755	0.0210411	-0.210439	0.000875084	-0.0433593	0.497576	-0.172332	0.00662734	-0.186827	0.00320553	-0.0115188	0.857058	0.0458876	0.472818	0.095214	0.135645	0.0117535	0.854178	0.0043967	0.945189	0.00549578	0.931518	-0.0198347	0.756427	0.00939564	0.883196	0.0333681	0.601736
joint10	WristLeft	Y	The skewness of amplitudes	-0.283656	5.93306e-06	-0.451327	8.47137e-14	0.10642	0.0951597	0.124955	0.0498136	0.183616	0.00378223	-0.0555048	0.385082	-0.34167	3.6044e-08	0.0171452	0.788615	-0.0207752	0.745267	0.0683422	0.284671	0.0268968	0.674012	0.0154526	0.80906	-0.00130252	0.983751	-0.032021	0.616495	0.117714	0.064739	-0.0496276	0.437465	0.0775865	0.22436
joint10	WristLeft	Y	The kurtosis of amplitudes	-0.256996	4.36277e-05	-0.430461	1.45538e-12	0.124291	0.0510516	0.113791	0.074245	0.172796	0.00648014	-0.0887349	0.164454	-0.357742	7.18825e-09	0.0297491	0.641734	-0.0454789	0.476774	0.0458832	0.472862	0.0438087	0.493127	0.00413165	0.948489	-0.00951519	0.881721	-0.0499903	0.434119	0.125212	0.0493417	-0.0481628	0.451128	0.0693321	0.277736
joint10	WristLeft	Z	Direct current component	0.23915	0.000147832	0.0388113	0.543783	-0.114017	0.0736695	0.00962433	0.880375	0.264626	2.51801e-05	-0.155241	0.0145959	0.229402	0.00027728	0.00465295	0.942	-0.0374392	0.558128	-0.0321198	0.615406	-0.110791	0.0822567	0.102953	0.106501	0.062953	0.324456	-0.0645223	0.312516	-0.0430345	0.500807	0.00968858	0.879582	0.00811466	0.89903
joint10	WristLeft	Z	The mean of phases	0.396397	1.01261e-10	-0.131214	0.0393364	-0.0920327	0.149265	0.0280424	0.660972	0.19914	0.00165847	-0.061396	0.336589	-0.158461	0.0126471	-0.0670338	0.294015	-0.000179955	0.997755	0.000545403	0.993196	-0.0941298	0.140175	-0.0392171	0.539576	-0.0139735	0.827033	-0.0465475	0.46647	0.0235859	0.712237	0.0549057	0.39024	0.00644599	0.919714
joint10	WristLeft	Z	The variance of phases	0.250132	7.05115e-05	-0.226554	0.000331575	-0.111815	0.0794485	0.036194	0.571303	0.205532	0.00115991	-0.0206925	0.746246	-0.197573	0.00180745	-0.0716097	0.262217	0.0279889	0.661579	-9.48869e-05	0.998816	-0.0454941	0.476627	-0.0530798	0.406217	-0.00235655	0.970606	-0.0410667	0.520607	0.00665075	0.917173	0.0665401	0.297593	0.0118924	0.852475
joint10	WristLeft	Z	The standard deviation of phases	0.246449	9.07238e-05	-0.238714	0.000152139	-0.127535	0.0452424	0.0569243	0.373026	0.219382	0.000515105	-0.0202822	0.751111	-0.215833	0.000637308	-0.065355	0.306299	0.0214833	0.7369	0.00401966	0.949883	-0.0643191	0.314046	-0.057088	0.37165	-0.0361601	0.571664	-0.0529034	0.407781	-0.0218047	0.733111	0.0877119	0.169393	0.0145208	0.820372
joint10	WristLeft	Z	The skewness of phases	0.0361078	0.57222	-0.243135	0.000113449	-0.0942028	0.139867	0.014498	0.82065	0.152726	0.0162963	0.00489214	0.939024	-0.175209	0.00576168	-0.0626803	0.32656	0.0533341	0.40397	-0.0230241	0.718799	0.0131021	0.837666	-0.0590487	0.355423	-0.0148573	0.816282	-0.0230165	0.718888	-0.0316957	0.620082	0.0651117	0.308107	0.0309291	0.628571
joint10	WristLeft	Z	The kurtosis of phases	0.00926266	0.884838	-0.193334	0.00227382	-0.0668374	0.295434	-0.0155225	0.808213	0.107468	0.0919287	-0.0034481	0.957002	-0.144481	0.0231405	-0.0749535	0.24053	0.0562737	0.378522	-0.0331006	0.604654	0.0390036	0.541788	-0.0461735	0.470062	0.000425473	0.994692	0.00253024	0.968441	-0.0136773	0.830644	0.0402733	0.528701	0.0301465	0.637289
joint10	WristLeft	Z	The mean of amplitudes	0.51741	2.58153e-18	-0.512529	6.02327e-18	-0.108269	0.0895187	0.0569588	0.372736	0.0443743	0.487556	0.0555647	0.384568	-0.0148203	0.816732	-0.0512329	0.422767	0.0347197	0.587089	0.00939351	0.883223	-0.0237394	0.710449	-0.0681654	0.285922	0.00560244	0.930192	0.00407553	0.949187	0.00992311	0.87669	0.0281608	0.659631	-0.000162753	0.997969
joint10	WristLeft	Z	The variance of amplitudes	-0.0520961	0.414984	-0.411835	1.57087e-11	-0.0754686	0.237304	0.075328	0.238182	0.0375653	0.556802	0.194009	0.00219296	0.0504045	0.430315	-0.0413187	0.518048	0.0732304	0.251544	-0.0250312	0.695456	0.0727281	0.254819	-0.141351	0.026324	-0.00881981	0.890309	0.0626899	0.326486	-0.0058069	0.927651	-0.046964	0.462487	0.0400195	0.531305
joint10	WristLeft	Z	The standard deviation of amplitudes	-0.0332447	0.603081	-0.478627	1.51201e-15	-0.0695874	0.275966	0.076644	0.230058	0.0249427	0.696479	0.216213	0.000623048	0.00809853	0.899229	-0.0167636	0.793212	0.0892097	0.162198	-0.0178104	0.780617	0.065187	0.307547	-0.118039	0.0639967	-0.0158791	0.803896	0.0383437	0.548651	-0.0225221	0.724679	-0.0194641	0.760838	0.0275267	0.66683
joint10	WristLeft	Z	The skewness of amplitudes	-0.529774	2.83672e-19	-0.294373	2.5053e-06	0.0994403	0.119052	0.0510697	0.424248	0.0785691	0.218529	0.312073	5.57781e-07	-0.168749	0.00786673	0.070437	0.270131	0.106478	0.0949805	-0.0527644	0.409016	0.0930565	0.144773	-0.0496472	0.437284	-0.0518226	0.41744	-0.0237461	0.710371	-0.0201512	0.752666	-0.0135015	0.832789	0.00882575	0.890235
joint10	WristLeft	Z	The kurtosis of amplitudes	-0.53681	7.7506e-20	-0.28815	4.15103e-06	0.10397	0.103071	0.0403275	0.528146	0.0698705	0.274013	0.306051	9.40246e-07	-0.175087	0.00579612	0.0613194	0.337194	0.101967	0.109914	-0.0499159	0.434803	0.0989263	0.120981	-0.0417639	0.513546	-0.0555461	0.384727	-0.0242645	0.70434	-0.0200039	0.754416	-0.0182006	0.775938	0.0111631	0.861428
joint14	WristRight	X	Direct current component	-0.39309	1.49097e-10	-0.331728	9.34507e-08	0.139036	0.0289142	-0.198372	0.00173001	-0.198402	0.00172717	0.103557	0.104453	0.0765101	0.230875	-0.0726628	0.255247	-0.0706043	0.268993	-0.0439492	0.49174	-0.0790917	0.215472	0.048432	0.448599	-0.0746274	0.242588	-0.0419979	0.511187	0.0072456	0.909795	0.033245	0.603078	0.00902237	0.887806
joint14	WristRight	X	The mean of phases	0.0906548	0.155476	-0.0577205	0.366366	-0.0414582	0.516635	0.252026	6.18459e-05	-0.318519	3.14821e-07	-0.00323768	0.959623	0.0186278	0.770823	0.0869045	0.173368	-0.0412144	0.519106	0.0528737	0.408045	-0.0272972	0.669443	-0.10038	0.115587	0.0564714	0.376846	0.0820115	0.198953	-0.00641366	0.920115	0.0203996	0.749717	-0.011374	0.858837
joint14	WristRight	X	The variance of phases	0.0114612	0.857766	-0.0543538	0.395029	-0.0103771	0.871097	0.221898	0.000442043	-0.247254	8.58907e-05	-0.0250628	0.69509	-2.46569e-05	0.999692	0.0285539	0.655182	-0.0397588	0.533985	0.134563	0.0345395	-0.0220205	0.730572	-0.138063	0.0300663	0.0277215	0.664614	0.0597057	0.350086	-0.000444749	0.994451	0.0337519	0.59756	-0.0517703	0.417911
joint14	WristRight	X	The standard deviation of phases	0.00797294	0.900784	-0.0505558	0.428931	-0.00334272	0.958315	0.217315	0.000583359	-0.250235	7.001e-05	-0.0216423	0.735025	-0.0126024	0.843777	0.0271339	0.671305	-0.0483869	0.449023	0.125697	0.0484612	-0.0187957	0.768815	-0.159336	0.0121587	0.0241051	0.706192	0.0483239	0.449614	0.00441267	0.94499	0.0466225	0.46575	-0.0625205	0.327797
joint14	WristRight	X	The skewness of phases	-0.0999882	0.117022	0.0125044	0.844976	0.0971605	0.127795	0.104045	0.102821	-0.105388	0.0984319	-0.0593308	0.353125	0.04188	0.512374	-0.0335405	0.599859	-0.0314329	0.622986	0.13827	0.0298172	0.0184807	0.772583	-0.125221	0.0493252	-0.0434554	0.496623	0.0120671	0.850332	0.0100886	0.87465	0.0594375	0.352258	-0.0766723	0.229885
joint14	WristRight	X	The kurtosis of phases	-0.0797072	0.21191	0.0329234	0.60659	0.0967022	0.129611	0.105303	0.0987048	-0.0960001	0.132431	-0.0675882	0.290031	0.070265	0.271306	-0.0201384	0.752818	-0.0299142	0.639886	0.129662	0.0417434	0.0183018	0.774724	-0.0830019	0.193565	-0.0373314	0.559263	0.0250569	0.695159	0.00430011	0.946391	0.0422528	0.508624	-0.0679278	0.287609
joint14	WristRight	X	The mean of amplitudes	0.653411	1.85524e-31	0.252915	5.81317e-05	-0.129616	0.0418168	0.0391006	0.540782	-0.0188383	0.768305	-0.121077	0.0574047	-0.0039448	0.950815	-0.0470464	0.461701	0.0644876	0.312777	0.101219	0.112561	0.00913783	0.88638	-0.0178448	0.780205	0.0165436	0.795865	0.0116805	0.855074	0.0389685	0.542151	-0.0236694	0.711264	-0.0138756	0.828226
joint14	WristRight	X	The variance of amplitudes	0.462398	1.72843e-14	0.327634	1.3701e-07	-0.134564	0.0345383	-0.0238273	0.709425	0.266316	2.22435e-05	-0.134444	0.0347009	-0.0075571	0.905934	-0.0838669	0.188947	0.141444	0.0262241	0.199563	0.00162024	0.00875202	0.891146	0.0331029	0.604628	0.0230467	0.718535	-0.0570232	0.372194	-0.00349952	0.956361	-0.0273239	0.669138	0.00730688	0.909035
joint14	WristRight	X	The standard deviation of amplitudes	0.52042	1.52032e-18	0.324473	1.83402e-07	-0.134335	0.034849	-0.061147	0.338556	0.188597	0.00292279	-0.112088	0.0787117	-0.00166609	0.979216	-0.117019	0.0663446	0.100185	0.116298	0.133249	0.0363591	0.0411749	0.519507	-0.036646	0.566503	-0.0200704	0.753626	-0.0231304	0.717556	0.0326375	0.609721	-0.00910229	0.886819	-0.014358	0.822353
joint14	WristRight	X	The skewness of amplitudes	-0.304228	1.09882e-06	0.105525	0.0979915	0.0743074	0.244619	-0.109273	0.0865696	0.204474	0.00123154	-0.0606634	0.342397	-0.0298544	0.640555	-0.114099	0.0734602	0.0114131	0.858357	0.137012	0.031354	-0.0310047	0.627732	-0.0460387	0.471361	-0.0185278	0.772019	0.00263328	0.967156	-0.0378306	0.554018	-0.0259562	0.684792	0.00682522	0.915008
joint14	WristRight	X	The kurtosis of amplitudes	-0.305184	1.0127e-06	0.131486	0.0389265	0.0856028	0.179923	-0.115441	0.070117	0.171843	0.00678547	-0.0690489	0.279708	-0.00836343	0.895952	-0.109814	0.0850129	0.00771436	0.903986	0.138738	0.0292624	-0.0337833	0.597219	-0.0502823	0.431436	-0.0204583	0.749022	0.00583241	0.927334	-0.0319232	0.617572	-0.0504799	0.429626	0.012674	0.8429
joint14	WristRight	Y	Direct current component	0.225803	0.000347448	0.38783	2.73456e-10	-0.181734	0.00416246	-0.0371284	0.561403	0.103957	0.103114	-0.193668	0.00223344	-0.126853	0.0464165	0.0852423	0.18177	0.121911	0.0556955	0.0834834	0.190984	0.106898	0.0936755	-0.0409496	0.521797	-0.00198936	0.975184	0.0109596	0.863929	0.00546442	0.931907	0.0425797	0.505347	0.051454	0.420765
joint14	WristRight	Y	The mean of phases	0.225724	0.000349171	0.0207059	0.746087	-0.119228	0.0613463	0.0637976	0.317994	0.0106289	0.867997	0.0105702	0.86872	-0.0918724	0.149978	0.253962	5.403e-05	-0.123833	0.0519183	-0.103196	0.105674	0.0196079	0.759126	-0.102646	0.107556	0.0704392	0.270116	-0.0606581	0.34244	-0.081821	0.200002	-0.0116845	0.855025	-0.0305714	0.63255
joint14	WristRight	Y	The variance of phases	0.133381	0.0361727	0.0362277	0.570945	-0.0924184	0.147561	0.0961732	0.131731	0.048479	0.448159	-0.0413978	0.517247	-0.147862	0.0200808	0.270287	1.65648e-05	-0.135591	0.0331698	-0.0789944	0.216038	0.00267631	0.96662	-0.0645856	0.31204	0.0898794	0.159056	0.00137987	0.982786	-0.0674002	0.291378	0.00723655	0.909907	-0.0343141	0.591468
joint14	WristRight	Y	The standard deviation of phases	0.116446	0.0676953	-0.0031739	0.960418	-0.0817257	0.200528	0.0827504	0.194923	0.0307938	0.630075	-0.0404244	0.527154	-0.163247	0.0101733	0.276262	1.05382e-05	-0.137812	0.0303695	-0.0831226	0.192916	0.00834606	0.896166	-0.0699553	0.27343	0.0830999	0.193038	0.00528696	0.934114	-0.085047	0.182777	0.0101392	0.874027	-0.0420643	0.510519
joint14	WristRight	Y	The skewness of phases	-0.0336446	0.598726	0.0528984	0.407825	-0.0211425	0.740923	0.0812832	0.202985	0.0530191	0.406755	-0.070516	0.269593	-0.0906835	0.155345	0.205776	0.00114394	-0.146998	0.0208271	-0.0432987	0.498179	0.00309386	0.961416	-0.00595117	0.925859	0.0692349	0.278412	0.0603846	0.344625	-0.055592	0.384334	0.0286706	0.653865	-0.0308069	0.629929
joint14	WristRight	Y	The kurtosis of phases	-0.018207	0.775861	0.116069	0.0685956	-0.00514863	0.935834	0.0884716	0.165714	0.0758686	0.23482	-0.0690528	0.279681	-0.0413455	0.517777	0.177579	0.00512619	-0.140307	0.0274665	-0.0349704	0.584391	9.32842e-06	0.999884	0.00763264	0.904998	0.0641741	0.31514	0.0562716	0.37854	-0.0452355	0.479139	0.0161541	0.800569	-0.0307372	0.630704
joint14	WristRight	Y	The mean of amplitudes	0.482416	8.40162e-16	0.369908	1.99548e-09	-0.210502	0.000871932	-0.0235799	0.712308	0.157102	0.0134397	-0.0431947	0.499212	-0.168181	0.0080813	0.281619	6.96199e-06	0.0631501	0.32294	-0.0932418	0.143971	0.160178	0.0117045	-0.0375191	0.557288	0.0504456	0.429939	0.0159222	0.803373	-0.0505912	0.428607	0.0165194	0.796158	-0.0239498	0.707999
joint14	WristRight	Y	The variance of amplitudes	0.29505	2.36973e-06	0.459093	2.79466e-14	-0.247275	8.57649e-05	-0.0062624	0.921993	0.283404	6.05226e-06	-0.120713	0.0581639	-0.11346	0.0750972	0.230261	0.000262598	0.140228	0.0275543	-0.0116916	0.854938	0.102253	0.108917	-0.0290956	0.649073	0.00477521	0.940479	-0.0124918	0.84513	-0.0292755	0.647049	-0.019331	0.762426	0.0121988	0.848719
joint14	WristRight	Y	The standard deviation of amplitudes	0.333025	8.26857e-08	0.342465	3.33503e-08	-0.195043	0.00207406	-0.0161733	0.800337	0.188763	0.00289737	-0.0917478	0.150534	-0.141102	0.0265923	0.178144	0.00498438	0.131212	0.0393398	-0.0181673	0.776336	0.120232	0.0591794	-0.0132429	0.835946	0.0184851	0.77253	0.00813416	0.898788	-0.035459	0.579148	0.00306745	0.961745	-0.0127043	0.842529
joint14	WristRight	Y	The skewness of amplitudes	-0.385745	3.46755e-10	-0.167873	0.00819974	0.0838683	0.188939	0.152278	0.0166169	0.00436854	0.94554	-0.102818	0.106964	-0.262978	2.83955e-05	0.052322	0.41296	0.10726	0.0925638	0.0328632	0.607248	-0.0977117	0.125637	-0.0540626	0.39757	0.00357202	0.955458	-0.0404456	0.526938	0.0360716	0.572606	0.0198679	0.756032	-0.0454799	0.476765
joint14	WristRight	Y	The kurtosis of amplitudes	-0.36007	5.6483e-09	-0.174196	0.00605404	0.101936	0.110023	0.152015	0.0168071	0.0143904	0.821959	-0.112148	0.0785515	-0.268292	1.92198e-05	0.0634377	0.320737	0.102705	0.107351	0.0387101	0.544835	-0.0803369	0.208311	-0.0810648	0.204205	-0.00253347	0.9684	-0.0535337	0.40221	0.0338335	0.596674	0.0114129	0.858358	-0.0306505	0.631668
joint14	WristRight	Z	Direct current component	-0.0622833	0.329639	0.328749	1.23524e-07	-0.0915982	0.151203	0.0977362	0.125541	-0.107575	0.0916044	-0.131253	0.0392785	-0.0608217	0.341137	-0.00776449	0.903365	0.102794	0.107047	0.0503552	0.430768	0.0432439	0.498723	-0.263225	2.78896e-05	0.0394193	0.537485	0.0706781	0.268491	-0.000188579	0.997647	0.14336	0.0242398	-0.00211201	0.973655
joint14	WristRight	Z	The mean of phases	0.299156	1.6858e-06	-0.231475	0.000243095	-0.187615	0.00307668	-0.0567068	0.374858	0.113927	0.0738991	0.0643502	0.313811	-0.0209686	0.742978	0.144496	0.0231262	0.0230958	0.71796	0.0385412	0.546592	0.0343189	0.591415	-0.0760614	0.23363	-0.0810127	0.204497	-0.00642575	0.919965	-0.0148719	0.816104	-0.0136073	0.831498	-0.0319353	0.617438
joint14	WristRight	Z	The variance of phases	0.129085	0.0426699	-0.284633	5.49264e-06	-0.201997	0.00141539	-0.0217078	0.734253	0.102413	0.108361	0.0654142	0.30586	-0.0482381	0.450419	0.142662	0.0249472	0.00392575	0.951052	0.00662541	0.917487	0.0403567	0.527847	-0.0778227	0.222948	-0.0232684	0.715943	-0.0358162	0.575329	-0.0178777	0.77981	-0.0217706	0.733513	-0.0366765	0.566181
joint14	WristRight	Z	The standard deviation of phases	0.120699	0.0581931	-0.309881	6.75457e-07	-0.206047	0.00112647	-0.00542746	0.932367	0.101098	0.112994	0.0903969	0.15666	-0.0661365	0.300539	0.160009	0.0117946	0.00193255	0.975893	0.00838732	0.895656	0.0291167	0.648835	-0.0680217	0.286941	-0.0220702	0.729986	-0.0461892	0.469911	-0.0373853	0.558696	-0.0204603	0.748998	-0.0484603	0.448334
joint14	WristRight	Z	The skewness of phases	-0.0912701	0.152679	-0.217273	0.00058481	-0.136997	0.0313725	0.00945852	0.88242	0.0644452	0.313096	0.0462245	0.469571	-0.0480411	0.452274	0.0964211	0.130734	-0.0227234	0.722319	-0.0466537	0.465452	0.0188754	0.767863	-0.0427248	0.503896	0.0350149	0.583912	-0.0413619	0.517611	-0.0323659	0.6127	-0.01117	0.861342	-0.0398702	0.532838
joint14	WristRight	Z	The kurtosis of phases	-0.081442	0.202101	-0.133838	0.0355329	-0.0970266	0.128323	-0.000727671	0.990922	0.0662178	0.299944	0.00752537	0.906327	-0.00387985	0.951624	0.0705318	0.269486	-0.0132837	0.835447	-0.0447472	0.483902	0.0335452	0.599808	-0.025468	0.690412	0.0273675	0.668643	-0.0208961	0.743836	-0.0232555	0.716094	-0.0168976	0.791596	-0.0372907	0.559692
joint14	WristRight	Z	The mean of amplitudes	0.431184	1.3232e-12	-0.456875	3.84741e-14	-0.341352	3.7177e-08	-0.00632056	0.921271	-0.0681543	0.286001	0.110907	0.0819347	0.0635835	0.319624	0.0172631	0.787195	-0.170583	0.00720877	-0.0466856	0.465146	-0.00611268	0.923853	0.0239804	0.707643	-0.128199	0.0441246	-0.00960678	0.880591	0.0147804	0.817216	0.0770866	0.227369	-0.0160147	0.802254
joint14	WristRight	Z	The variance of amplitudes	-0.10261	0.107678	-0.256479	4.52552e-05	-0.205123	0.00118716	0.0735452	0.249506	-0.0701837	0.271862	0.0861235	0.17728	0.0944503	0.138824	-0.122149	0.0552158	-0.21131	0.000831869	-0.126452	0.0471176	0.0633793	0.321183	0.0195289	0.760066	-0.0100254	0.875429	-0.0156804	0.806301	0.0045535	0.943238	-0.0386127	0.545848	0.0479477	0.453154
joint14	WristRight	Z	The standard deviation of amplitudes	-0.106028	0.0963925	-0.320513	2.63057e-07	-0.197356	0.00182911	0.0939175	0.141075	-0.102195	0.109118	0.117493	0.0652465	0.0713791	0.263761	-0.079839	0.211153	-0.191181	0.00255057	-0.11249	0.0776388	0.0147398	0.817709	0.0379112	0.553173	-0.00978142	0.878437	-0.0261898	0.682108	-0.00440418	0.945096	0.00742588	0.90756	0.0280703	0.660656
joint14	WristRight	Z	The skewness of amplitudes	-0.562873	4.8184e-22	-0.249401	7.41522e-05	0.0636595	0.319045	0.166709	0.00866108	-0.0569645	0.372688	0.0726884	0.255079	-6.97792e-05	0.999129	0.00395956	0.950631	-0.0804535	0.207649	-0.0538007	0.399863	-0.0453234	0.478285	0.0328708	0.607166	0.0334104	0.601274	-0.0473138	0.459156	-0.0249973	0.695848	-0.0166246	0.794888	0.00880944	0.890437
joint14	WristRight	Z	The kurtosis of amplitudes	-0.55862	1.13831e-21	-0.256682	4.46093e-05	0.0735149	0.249701	0.152609	0.0163795	-0.059171	0.354425	0.0802569	0.208766	0.00625621	0.92207	0.00363252	0.954704	-0.0835815	0.190461	-0.0484148	0.448761	-0.0408226	0.52309	0.0326722	0.60934	0.0256166	0.6887	-0.0407567	0.523762	-0.0269526	0.673374	-0.0248012	0.698116	0.00441965	0.944903
